# Supplementary material for: A Simple Biomimetic Receptor Selectively Recognizing the GlcNAc2 Disaccharide in Water
Source: PubMed Central journal article supplement (PMC8252438; doi:10.1002/anie.202100560), 2021-04-06
Supplement: ANIE-60-11168-s001.pdf [file ANIE-60-11168-s001.pdf]

## Supporting Information

### **A Simple Biomimetic Receptor Selectively Recognizing the GlcNAc<sub>2</sub> Disaccharide in Water**

*Oscar Francesconi,\* Francesco Milanesi, Cristina Nativi, and Stefano Roelens\**

anie\_202100560\_sm\_miscellaneous\_information.pdf

## SUPPORTING INFORMATION

|                                                             |               |
|-------------------------------------------------------------|---------------|
| <b>Synthesis and characterization of chemical materials</b> | <b>p. S2</b>  |
| <b>General</b>                                              | <b>p. S2</b>  |
| <b>Materials</b>                                            | <b>p. S2</b>  |
| <b>NMR Spectra</b>                                          | <b>p. S4</b>  |
| <b>Binding studies</b>                                      | <b>p. S6</b>  |
| <b>NMR preliminary screening</b>                            | <b>p. S6</b>  |
| <b>NMR titrations and data analysis</b>                     | <b>p. S8</b>  |
| <b>Calorimetric titrations and data analysis</b>            | <b>p. S42</b> |
| <b>Structural studies</b>                                   | <b>p. S63</b> |
| <b>NMR methods</b>                                          | <b>p. S63</b> |
| <b>Molecular modeling methods</b>                           | <b>p. S66</b> |
| <b>References</b>                                           | <b>p. S67</b> |

## Synthesis and characterization of chemical materials.

**General.** ESI-MS analyses were performed in negative ion mode and were recorded on an LCQ-Fleet Ion Trap equipped with a standard Ionspray interface. HRMS were performed on a Triple-TOF with a resolution of 35000 (FWHM). Chemical shifts are reported in part per million ( $\delta$ ) relative to 4,4-Dimethyl-4-silapentane-1-sulfonic acid (DSS) for D<sub>2</sub>O, using the residual solvent line as secondary internal reference (4.79 ppm for spectra run in D<sub>2</sub>O). <sup>13</sup>C NMR spectra were obtained at 125 MHz in D<sub>2</sub>O. Chemical shifts are reported in  $\delta$  relative to DSS for D<sub>2</sub>O.

**Materials.** Reagents were purchased from commercial suppliers and used without purification. Compound **2** was prepared according to known methods<sup>[13]</sup>

### Receptor 1.

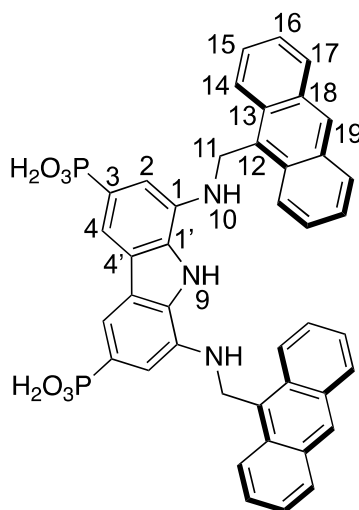

To a solution of **2** (809 mg, 0.950 mmol) in 6.4 mL of dry CH<sub>2</sub>Cl<sub>2</sub>, Et<sub>3</sub>N (784 mg, 7.62 mmol) was added under a nitrogen atmosphere. The solution was cooled to 0 °C and TMSBr (1.17 g, 7.62 mmol) was slowly added. The solution was stirred at room temperature for 22 h, then diluted with 25 mL of CH<sub>2</sub>Cl<sub>2</sub> and cooled to 0 °C. After addition of 50 mL of MeOH, the solution was stirred at room temperature for 30 minutes and the solvent evaporated to give 1.84 g of crude **2** as a pale brown solid. The solid was dissolved in 50 mL of NaOH 0.3 M under an ice bath and the aqueous phase washed with AcOEt (4 x 30 mL). EtOH (120 mL) was then added to the aqueous phase and the resulting suspension was centrifugated at 3000 rpm for 20 minutes. The liquids were removed, the solid was dissolved in water (40 mL), then, NaOH 0.5 M was added under an ice bath until pH = 12 was reached. Then, HCl 0.5 M was added (160 mL) and the resulting suspension was centrifugated at 3000 rpm for 20 minutes. The liquids were removed and the solid was suspended in

160 mL of HCl 0.1 M: The suspension was centrifugated at 3000 rpm for 20 minutes, the liquids were removed and the solid was suspended in MeOH (2 x 40 mL) and the resulting suspension centrifugated at 3000 rpm for 20 minutes. The liquids were removed, and the yellow solid was dried in vacuo to obtain pure **2** (380 mg, 54%). Mp: 145.2 (dec) °C; <sup>1</sup>H NMR (500 MHz, D<sub>2</sub>O, DSS as internal reference,  $\delta = 0.0$ ):  $\delta$  8.02 (d,  $J = 11.9$  Hz, 2H, CH-4); 7.86 (d,  $J = 9.0$  Hz, 2H, CH-14); 7.53 (d,  $J = 11.6$  Hz, 2H, CH-2); 7.16-7.13 (m, 6H, CH-15, CH-19); 7.00 (bs, 8H, CH-16, CH-17); 4.93 (s, 4H, CH<sub>2</sub>-11); <sup>13</sup>C NMR (125 MHz, D<sub>2</sub>O, DSS as internal reference,  $\delta = 0.0$ ):  $\delta$  135.93 (d,  $J = 143.2$  Hz); 135.2 (d,  $J = 10.7$  Hz); 133.8; 133.29; 132.35; 132.28, 131.31 (CH-17); 129.99 (CH-19); 128.95 (CH-15); 127.60 (CH-16); 126.33 (CH-14); 125.93 (d,  $J = 16.3$  Hz); 117.81 (CH-4); 117.73 (CH-2); 45.05 (CH<sub>2</sub>-11); <sup>31</sup>P NMR (202 MHz, D<sub>2</sub>O):  $\delta$  12.73; ESI-MS  $m/z$  (%): 367.67 (100%) [M-2H]<sup>2-</sup>, 736.25 (86%) [M-1H]<sup>-</sup>; HRMS ( $m/z$ ): [M-2H]<sup>2-</sup> calcd. for C<sub>42</sub>H<sub>33</sub>N<sub>3</sub>O<sub>6</sub>P<sub>2</sub>, 367.58496; found, 367.58727.

# NMR spectra.

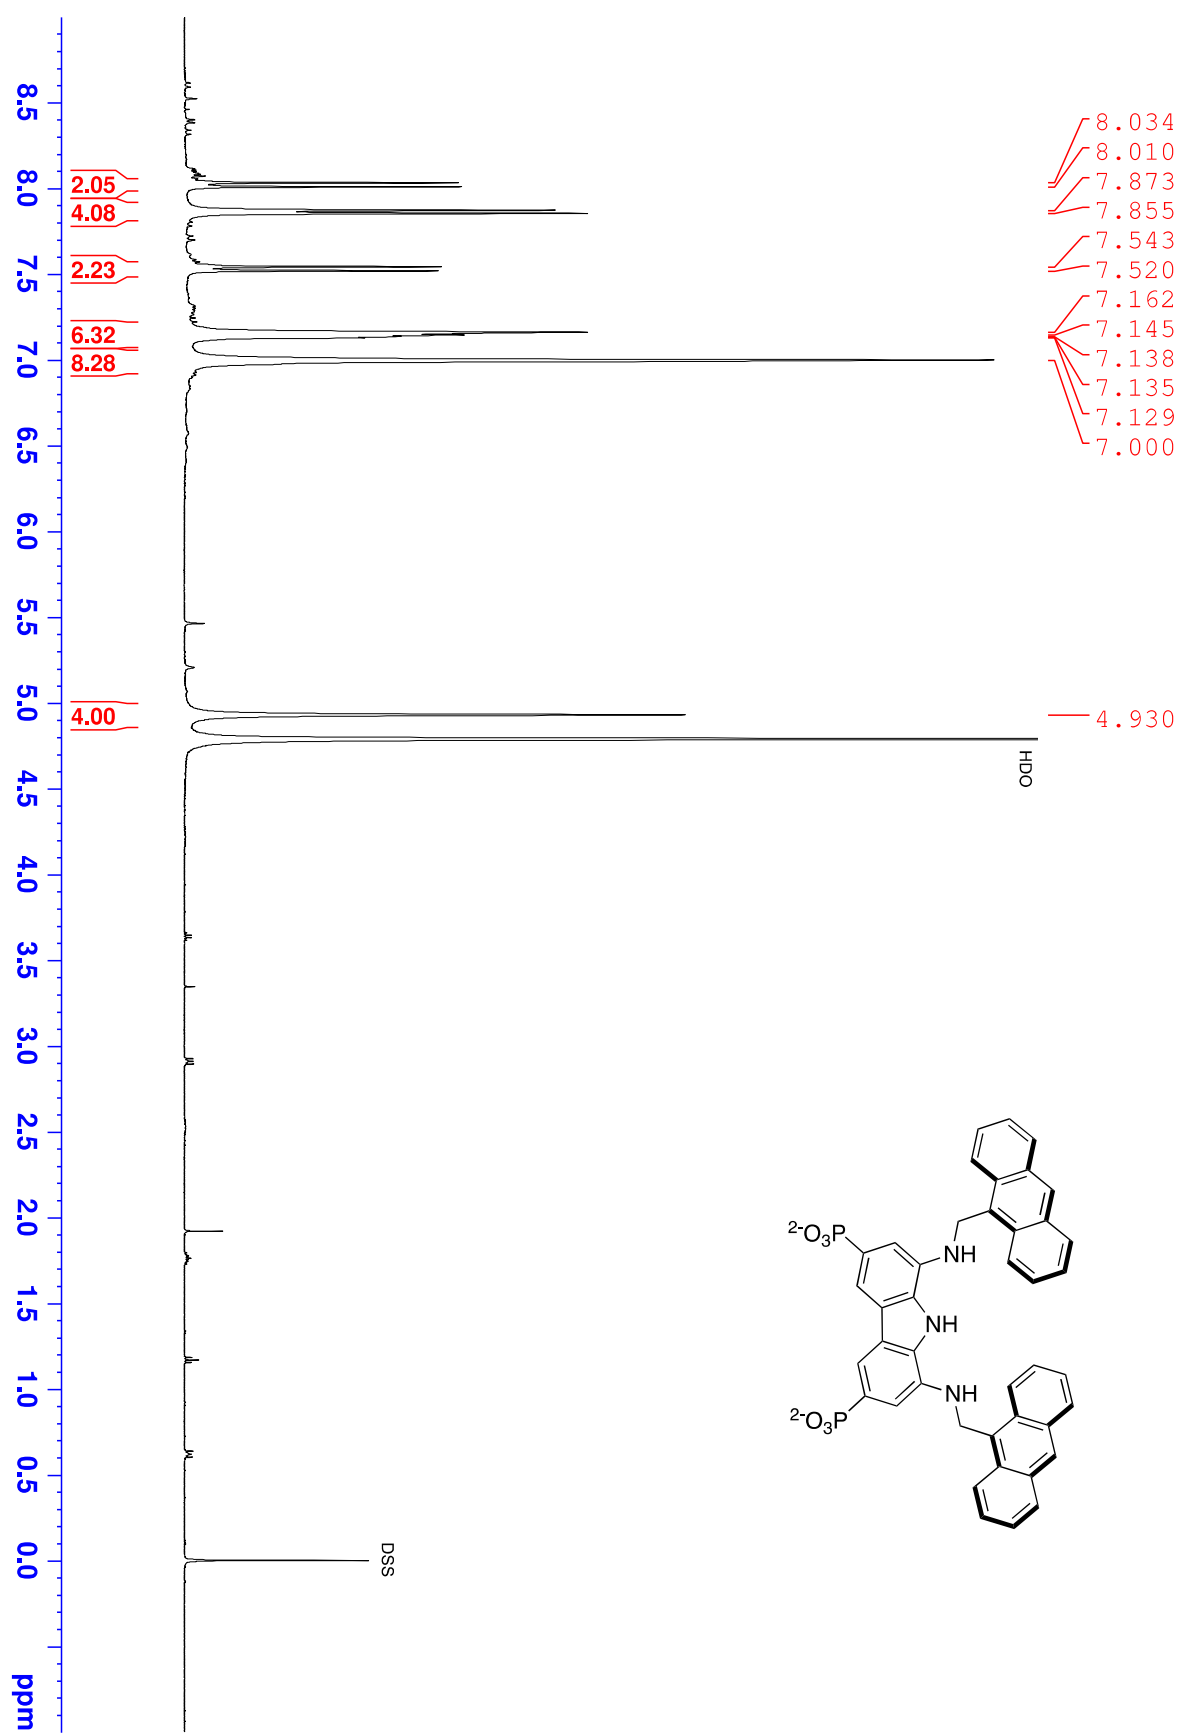

Figure S1. <sup>1</sup>H NMR spectrum of receptor 1 (500 MHz, D<sub>2</sub>O + DSS).



## Binding studies.

**NMR preliminary screening.** Preliminary screenings (298 K, 500 MHz) were performed in D<sub>2</sub>O at pD 11 in presence of DSS as internal reference. Solution of reducing carbohydrates were prepared in D<sub>2</sub>O and kept overnight at room temperature before the screening experiments, to ensure equilibration of the anomers. The spectra of the free sugars at 1 mM concentration were compared to the spectra of the equimolar mixture of sugars with receptor **1** (1 mM each) and chemical shift differences were evaluated.

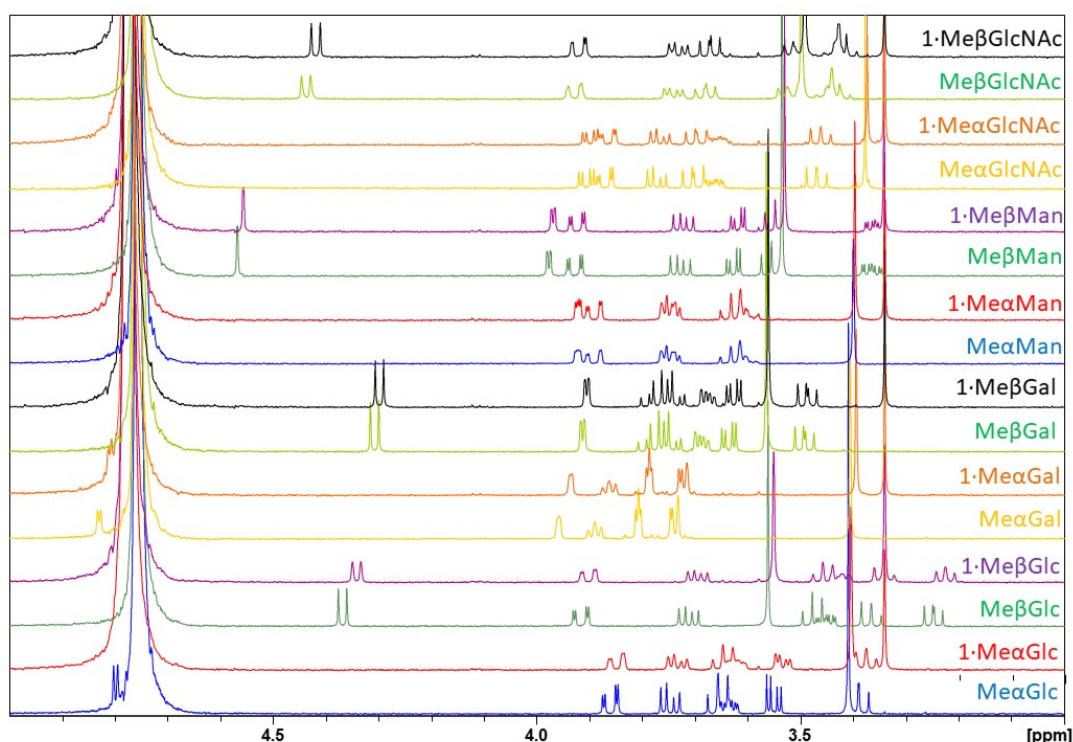

**Figure S3.** <sup>1</sup>H NMR spectra (500 MHz, D<sub>2</sub>O) of a 1 mM solution of methyl glycosides and an equimolar mixture of methyl glycosides and **1** (1 mM each) at pD 11.

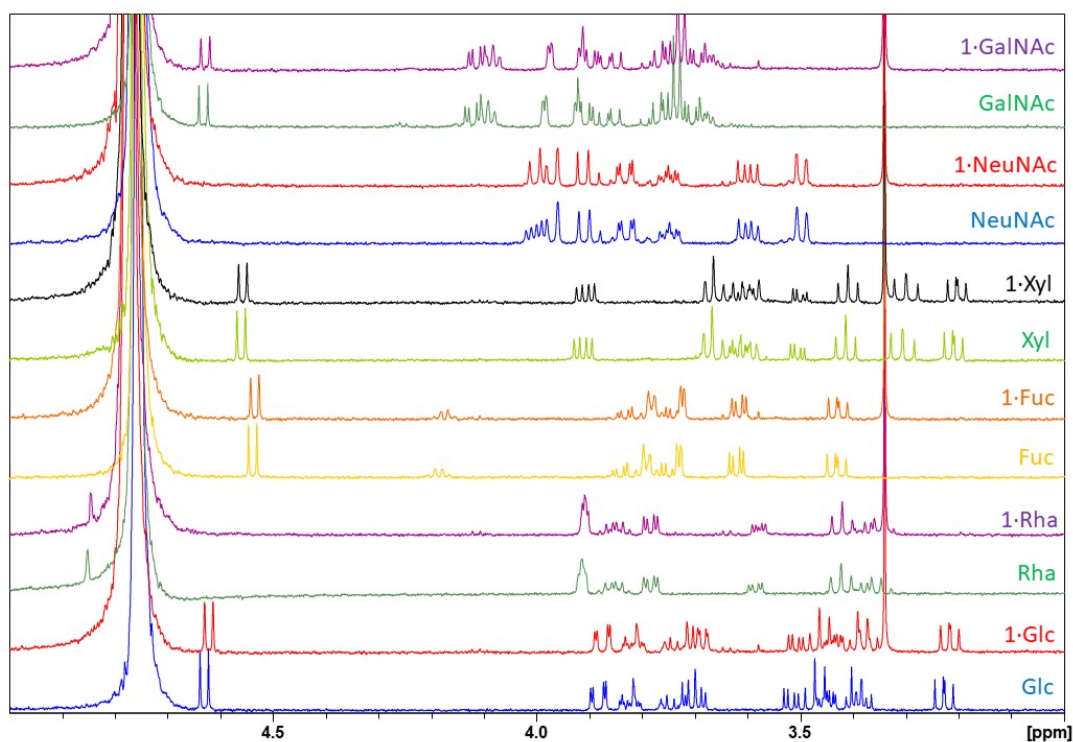

**Figure S4.**  $^1\text{H}$  NMR spectra (500 MHz,  $\text{D}_2\text{O}$ ) of a 1 mM solution of monosaccharides and an equimolar mixture of monosaccharides and **1** (1 mM each) at pD 11.

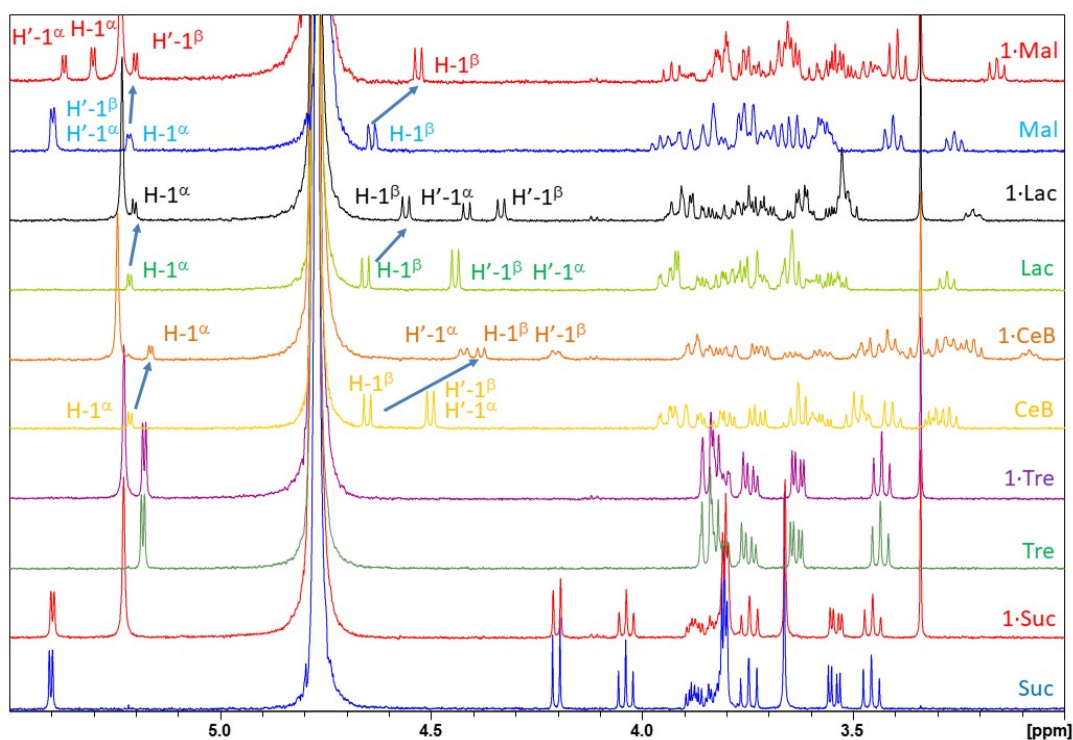

**Figure S5.**  $^1\text{H}$  NMR spectra (500 MHz,  $\text{D}_2\text{O}$ ) of a 1 mM solution of disaccharides and an equimolar mixture of disaccharides and **1** (1 mM each) at pD 11. Variations of the H-1 proton signal shifts of CeB, Lac, Mal are  $\Delta\delta = 0.05$ , 0.01, 0.03 ppm for the  $\alpha$  and  $\Delta\delta = 0.23$ , 0.10, 0.11 ppm for the  $\beta$  anomer respectively.



**NMR titrations and data analysis.** Titrations were performed at 298 K, 500 MHz in 5 mm NMR tubes using microsyringes, following a previously described technique.<sup>S1</sup> Concentration of the receptor was measured using an internal standard (DMSO<sub>2</sub>) preliminarily to each binding measurement and maintained constant during the titrations with glycosides to avoid changes in ionic strength. The stock solutions of **1** were prepared in D<sub>2</sub>O adjusting the pD with a diluted NaOH solution in D<sub>2</sub>O. A correction factor of +0.4 was applied to the pH values measured by the pH meter to determine the pD values (pD = pH + 0.4). DSS was used as internal reference. The alkaline stock solution of **1** was stored during the titrations under nitrogen atmosphere to avoid acid/base reactions with atmospheric CO<sub>2</sub>. Following this strategy, constant values of pD were observed during titrations and dilution experiments. DSS was used as internal reference. Dimerization constants of receptor **1** at pD 7.4 and at pD 11, were set invariant in the non-linear regression analysis of receptor-glycosides binding data measured at pD 7.4 and pD 11, respectively. Mathematical analysis of data and graphic presentation of results was performed using the HypNMR 2006 program.<sup>S2</sup> BC<sub>50</sub> Calculator, the utility program for computing  $BC_{50}^{0,15}$ , is available for free at the corresponding author's e-mail address. Results pages and Plots of experimental and calculated shifts are reported hereafter.

## Dilution of receptor 1 (D<sub>2</sub>O, pD 7.4, 298 K, 500 MHz).

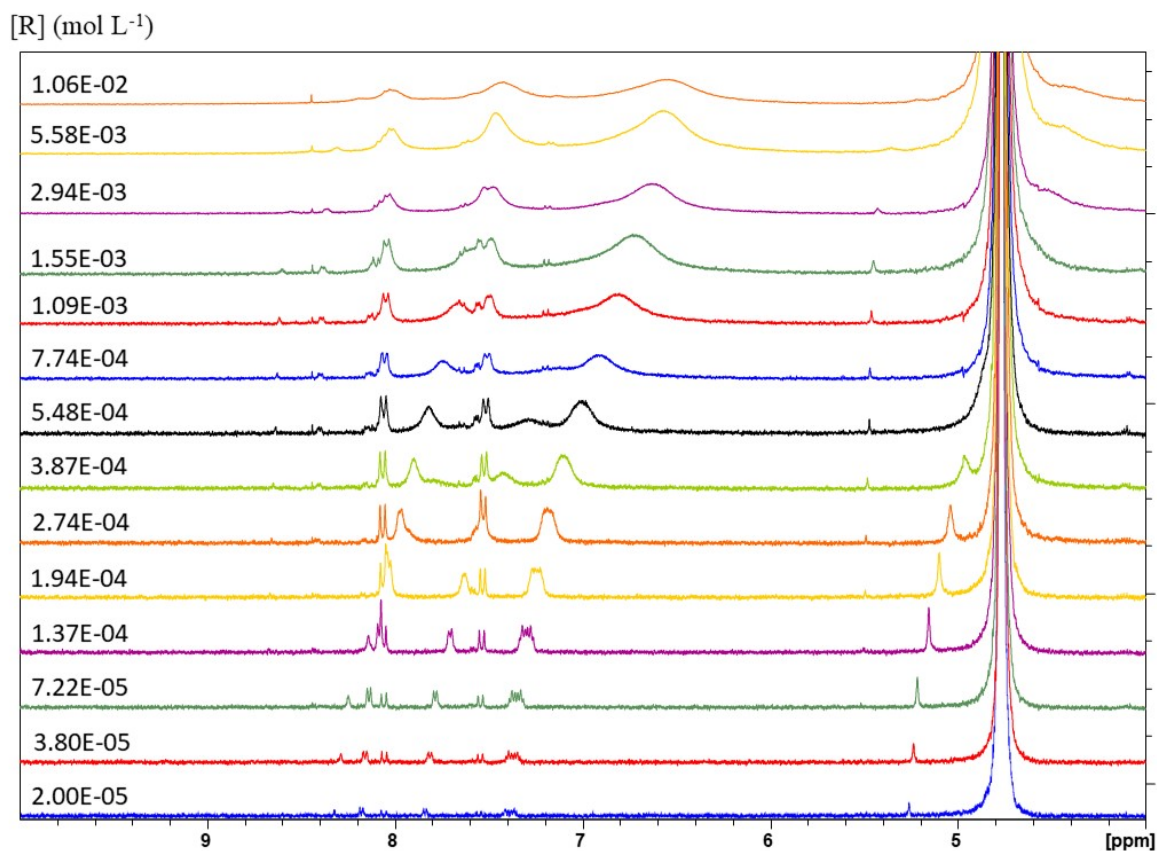

**Figure S6.** <sup>1</sup>H NMR spectroscopic spectra (500 MHz, D<sub>2</sub>O, pD 7.4, 298 K) of receptor 1 (R) at different concentrations in dilution experiment.

### Data Table

$\delta$  (ppm) vs. [R] (mol L<sup>-1</sup>)

| [R]      | CH-G<br>R | CH-C<br>R | CH-F<br>R | CH-B<br>R | CH-2<br>R |
|----------|-----------|-----------|-----------|-----------|-----------|
| 2.00E-05 | 8.3231    | 8.1791    | 7.8391    | 7.5525    | 5.2589    |
| 3.80E-05 | 8.2915    | 8.1632    | 7.8166    | 7.5496    | 5.2409    |
| 7.22E-05 | 8.2501    | 8.1404    | 7.7874    | 7.5459    | 5.2171    |
| 1.37E-04 | 8.1445    | 8.0865    | 7.7081    | 7.5396    | 5.1577    |
| 1.94E-04 | -         | 8.0357    | 7.6338    | 7.5355    | 5.1051    |
| 2.74E-04 | 7.9351    | 7.9737    | 7.5398    | 7.5307    | 5.0411    |
| 3.87E-04 | 7.7970    | 7.9014    | 7.4248    | 7.5259    | 4.9638    |
| 5.48E-04 | -         | 7.8232    | 7.2940    | 7.5189    | -         |
| 7.74E-04 | -         | 7.7493    | 7.1330    | 7.5106    | -         |
| 1.09E-03 | -         | 7.6710    | -         | 7.5008    | -         |
| 1.55E-03 | -         | 7.5981    | -         | 7.4939    | -         |
| 2.94E-03 | -         | -         | -         | 7.4748    | 4.5290    |
| 5.58E-03 | -         | 7.4669    | -         | 7.4655    | 4.4540    |
| 1.06E-02 | -         | 7.4177    | -         | 7.4247    | 4.4120    |

## Results page

no. of spectra 14  
no. of resonance values 52  
no. of resonant nuclei 5

Chi-squared = 7.38

sigma = 0.00472549283 RMS weighted residual = 0.00387685411

|      | stoich<br>coeff | value       | relative<br>std devn | log<br>beta | standard<br>deviation |        |
|------|-----------------|-------------|----------------------|-------------|-----------------------|--------|
| Beta | 2 refined       | 4.4211E+002 | 0.1557               | 2.6455      | 0.0676                | ( R2 ) |
| Beta | 4 refined       | 2.5653E+009 | 0.2599               | 9.4091      | 0.1129                | ( R4 ) |

Individual chemical shifts

|      |   | R      |        | 2      |        |
|------|---|--------|--------|--------|--------|
|      | + | value  | error  | value  | error  |
| CH-G | + | 8.3574 | 0.0047 | 6.4205 | 0.3035 |
| CH-C | + | 8.2006 | 0.0039 | 7.1043 | 0.1514 |
| CH-F | + | 7.8633 | 0.0045 | 6.4857 | 0.2426 |
| CH-B | + | 7.5491 | 0.0032 | 7.5032 | 0.0267 |
| CH-2 | + | 5.2787 | 0.0039 | 4.1586 | 0.1697 |

|      | + | 4      |        |
|------|---|--------|--------|
|      | + | value  | error  |
| CH-G | + | 6.6141 | 0.1198 |
| CH-C | + | 7.3655 | 0.0109 |
| CH-F | + | 6.3413 | 0.0454 |
| CH-B | + | 7.4446 | 0.0051 |
| CH-2 | + | 4.3405 | 0.0119 |

Correlation coefficients\*1000

|   | 1   | 2 |
|---|-----|---|
| 1 |     |   |
| 2 | 834 |   |

Parameters are numbered as follows

1 beta 2  
2 beta 4

### Titration Plots

Chemical shifts ( $\delta$ , ppm) vs. concentration of R (mol L<sup>-1</sup>)  
 experimental (symbols) and calculated (lines) values

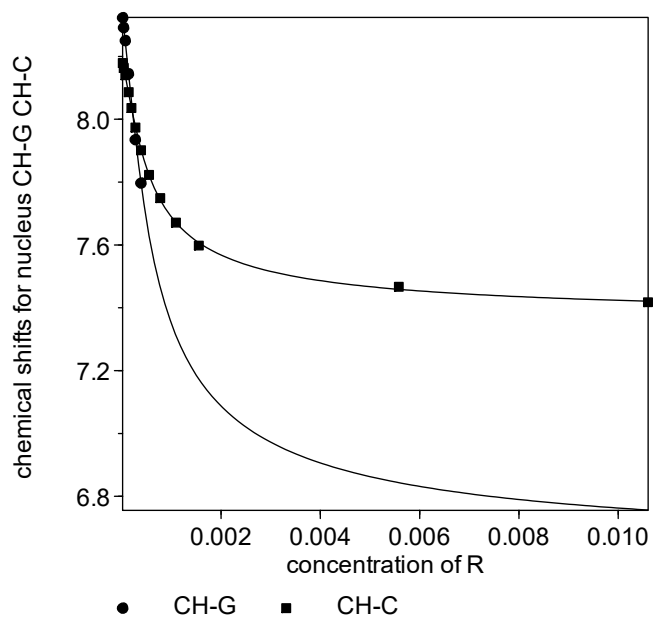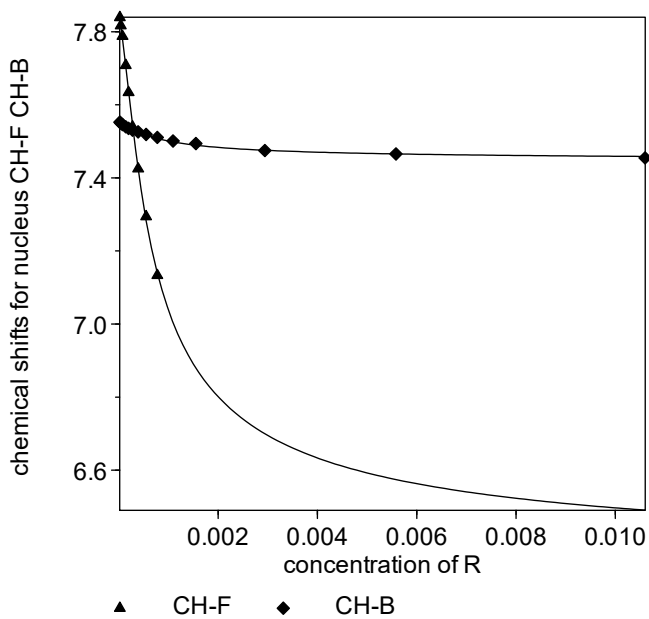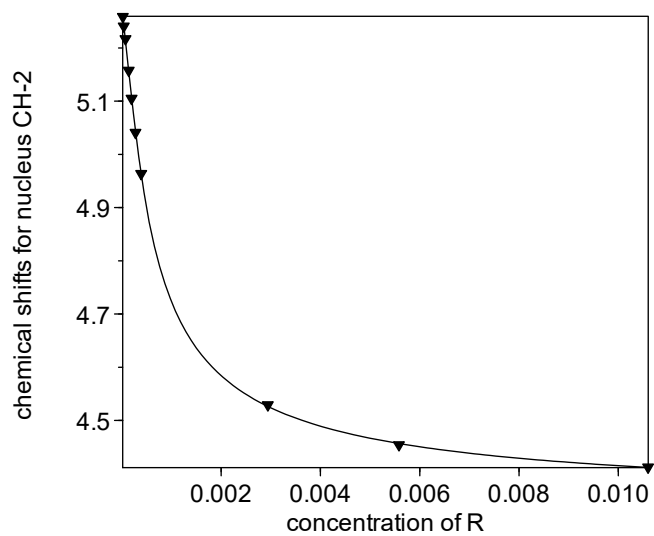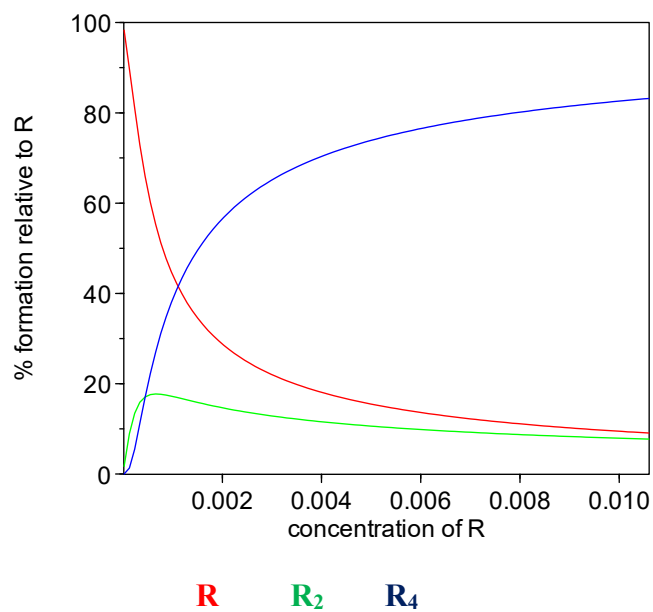

## Dilution of receptor 1 (D<sub>2</sub>O, pD 11, 298 K, 500 MHz).

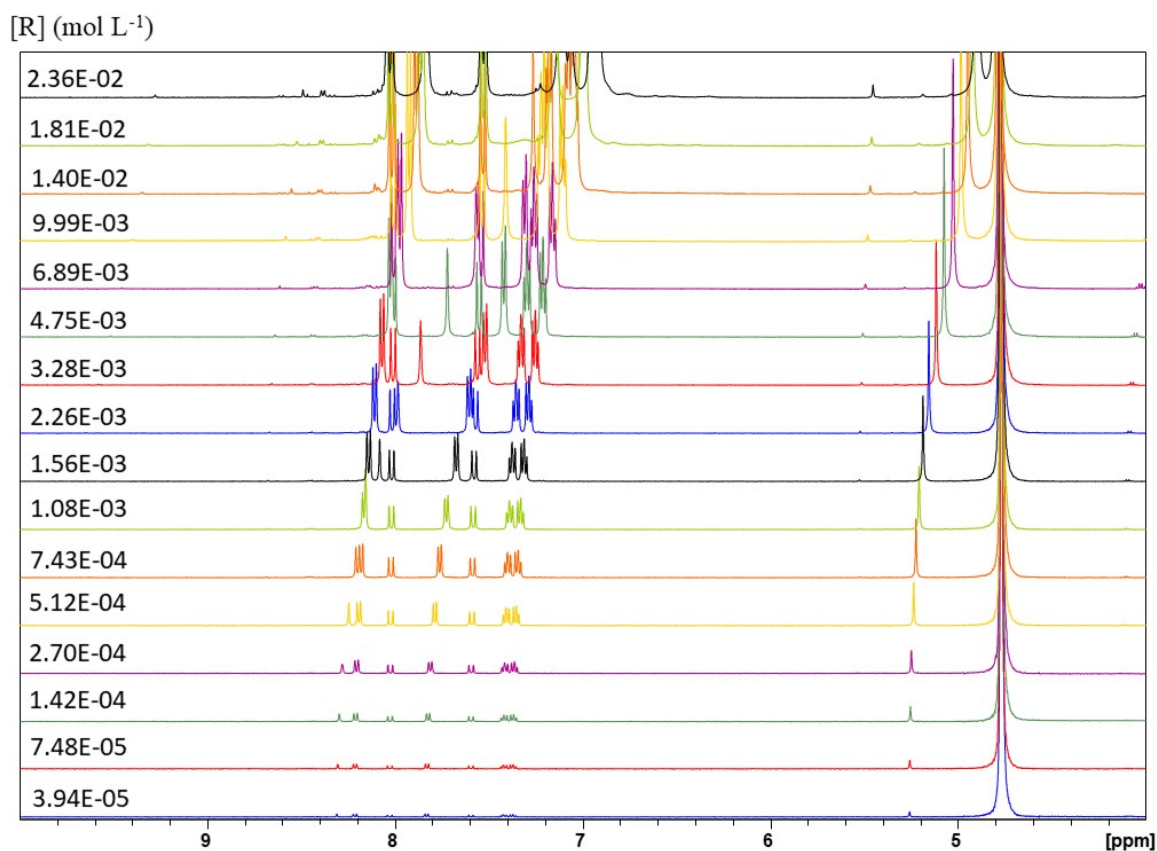

**Figure S7.** <sup>1</sup>H NMR spectroscopic spectra (500 MHz, D<sub>2</sub>O, pD 11, 298 K) of receptor **1** (R) at different concentrations in dilution experiment.

### Data Table

R = 1

$\delta$  (ppm) vs. [R] (mol L<sup>-1</sup>)

| [R]      | CH-G<br>R | CH-C<br>R | CH-A<br>R | CH-F<br>R | CH-B<br>R |
|----------|-----------|-----------|-----------|-----------|-----------|
| 3.94E-05 | 8.3117    | 8.2243    | 8.0424    | 7.8428    | 7.6089    |
| 7.48E-05 | 8.3070    | 8.2235    | 8.0419    | 7.8400    | 7.6096    |
| 1.42E-04 | 8.2989    | 8.2207    | 8.0405    | 7.8337    | 7.6088    |
| 2.70E-04 | 8.2829    | 8.2154    | 8.0395    | 7.8226    | 7.6078    |
| 5.12E-04 | 8.2488    | 8.2045    | 8.0380    | 7.7990    | 7.6052    |
| 7.43E-04 | 8.2116    | 8.1925    | 8.0364    | 7.7728    | 7.6021    |
| 1.08E-03 | 8.1598    | 8.1758    | 8.0342    | 7.7381    | 7.5978    |
| 1.56E-03 | 8.0836    | 8.1506    | 8.0313    | 7.6835    | -         |
| 2.26E-03 | 7.9856    | 8.1188    | 8.0280    | 7.6144    | 7.5837    |
| 3.28E-03 | 7.8659    | 8.0800    | 8.0245    | 7.5308    | 7.5746    |
| 4.75E-03 | 7.7224    | 8.0340    | -         | 7.4291    | 7.5645    |
| 6.89E-03 | 7.5706    | 7.9863    | 8.0217    | 7.3208    | 7.5561    |
| 9.99E-03 | 7.4104    | 7.9382    | 8.0249    | -         | 7.5493    |
| 1.40E-02 | 7.2670    | 7.8981    | 8.0305    | 7.0950    | 7.5449    |
| 1.81E-02 | 7.1583    | 7.8725    | 8.0362    | -         | 7.5428    |
| 2.36E-02 | 7.0649    | 7.8495    | 8.0429    | 6.9289    | 7.5416    |

## Results page

no. of spectra 16  
no. of resonance values 92  
no. of resonant nuclei 6

sigma = 0.00105982572 RMS weighted residual = 0.00089083489

|      | stoich<br>coeff | value       | relative<br>std devn | log<br>beta | standard<br>deviation |        |  |
|------|-----------------|-------------|----------------------|-------------|-----------------------|--------|--|
| Beta | 2 refined       | 1.4667E+003 | 0.1658               | 3.1663      | 0.0720                | ( R2 ) |  |
| Beta | 4 refined       | 4.5958E+008 | 0.2472               | 8.6624      | 0.1074                | ( R4 ) |  |
| Beta | 8 refined       | 2.0568E+019 | 0.4825               | 19.3132     | 0.2096                | ( R8 ) |  |

Individual chemical shifts

|      |   | R      |        | 2      |        |
|------|---|--------|--------|--------|--------|
|      |   | value  | error  | value  | error  |
| CH-G | + | 8.3177 | 0.0011 | 8.2536 | 0.0114 |
| CH-C | + | 8.2258 | 0.0010 | 8.2093 | 0.0038 |
| CH-A | + | 8.0434 | 0.0009 | 8.0333 | 0.0018 |
| CH-F | + | 7.8479 | 0.0010 | 7.7994 | 0.0084 |
| CH-B | + | 7.6101 | 0.0009 | 7.6054 | 0.0020 |
| CH-2 | + | 5.2626 | 0.0009 | 5.2400 | 0.0039 |
|      | + |        |        |        |        |
|      |   | 4      |        | 8      |        |
|      |   | value  | error  | value  | error  |
| CH-G | + | 6.3761 | 0.0719 | 6.4302 | 0.0307 |
| CH-C | + | 7.5794 | 0.0219 | 7.7824 | 0.0250 |
| CH-A | + | 7.9777 | 0.0046 | 8.1913 | 0.0221 |
| CH-F | + | 6.5057 | 0.0526 | 6.3138 | 0.0242 |
| CH-B | + | 7.4546 | 0.0057 | 7.6127 | 0.0181 |
| CH-2 | + | 4.6419 | 0.0208 | 4.8604 | 0.0263 |

Correlation coefficients\*1000

|   | 1   | 2   | 3 |
|---|-----|-----|---|
| 1 |     |     |   |
| 2 | 990 |     |   |
| 3 | 890 | 939 |   |

Parameters are numbered as follows

1 beta 2  
2 beta 4  
3 beta 8

### Titration Plots

Chemical shifts ( $\delta$ , ppm) vs. concentration of R (mol L<sup>-1</sup>)  
 experimental (symbols) and calculated (lines) values

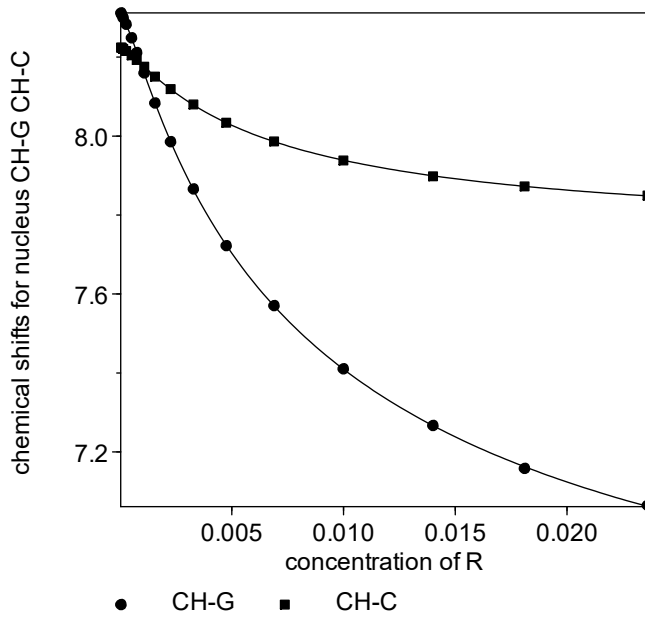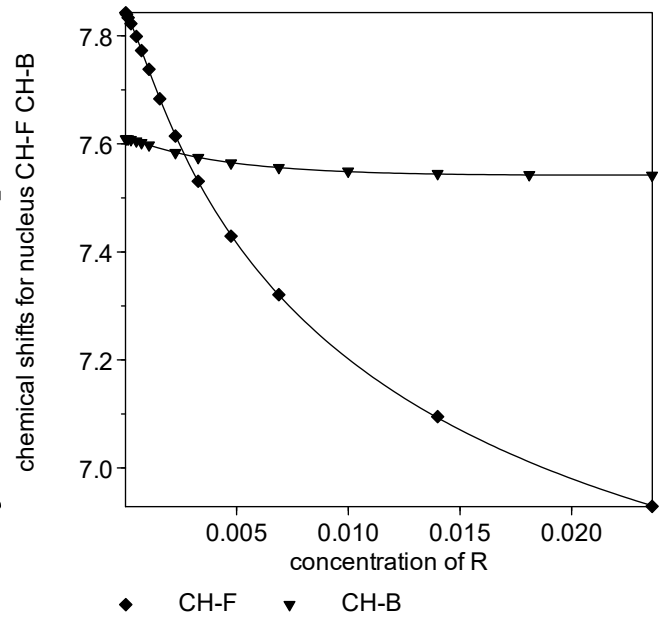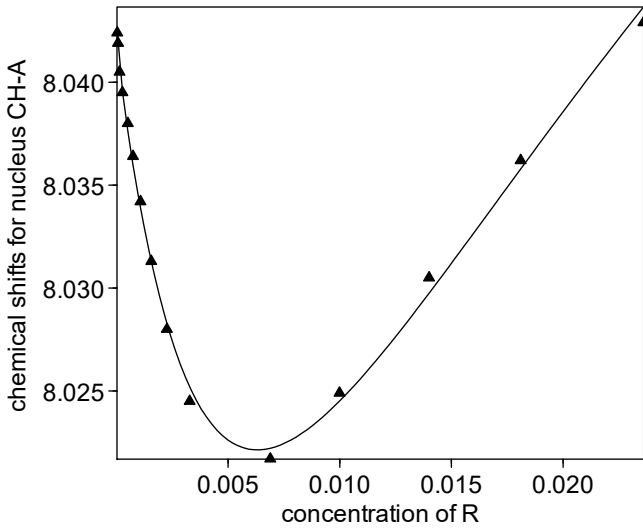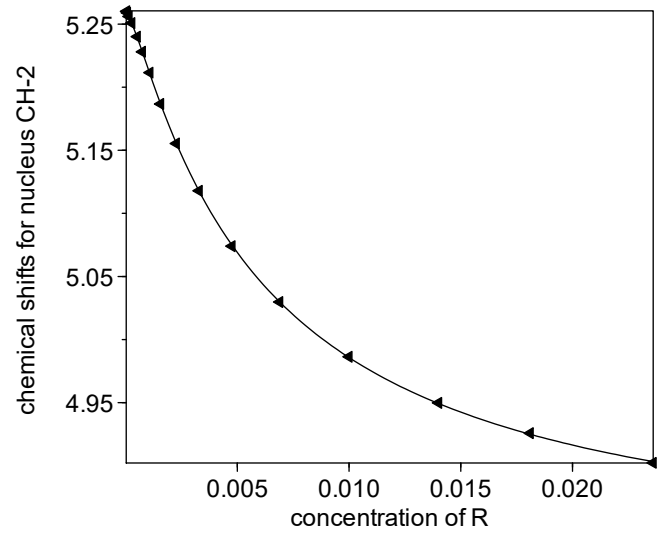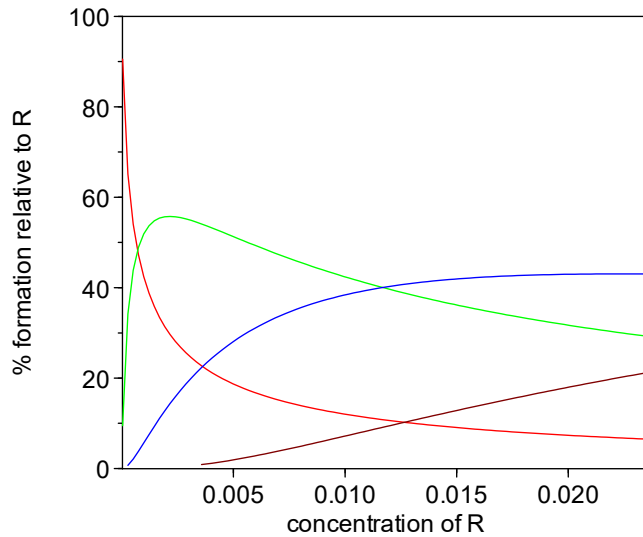

**R**    **R<sub>2</sub>**    **R<sub>4</sub>**    **R<sub>8</sub>**

**1 + Me $\beta$ CeB (D<sub>2</sub>O, pD 7.4, 298 K, 500 MHz).**

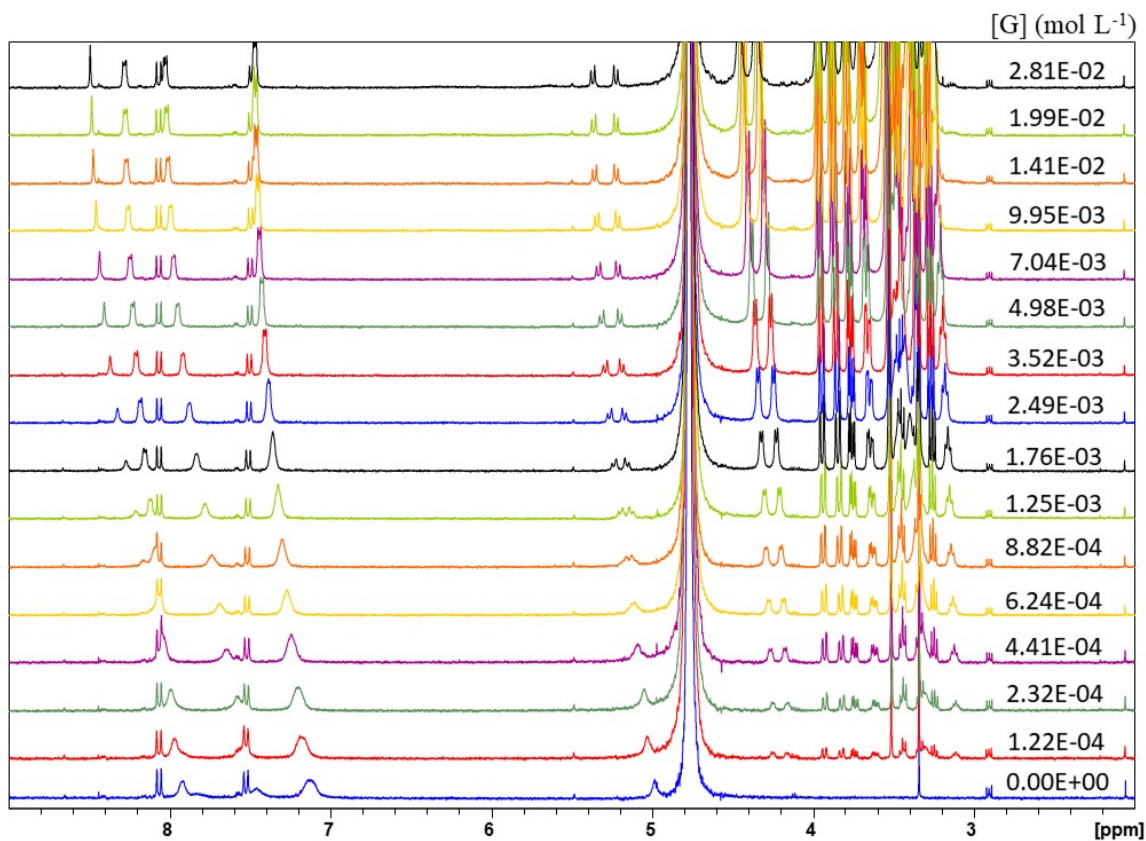

**Figure S8.** <sup>1</sup>H NMR spectroscopic titration (500 MHz, D<sub>2</sub>O, pD 7.4, 298 K) of receptor **1** ( $5.06 \cdot 10^{-4}$  mol L<sup>-1</sup>) with incremental concentrations of Me $\beta$ CeB (G).



### Data Table

R = 1 G = MeßCeB

$\delta$  (ppm) vs. [G] (mol L<sup>-1</sup>)

Titration [R] = 5.06 10<sup>-4</sup> mol L<sup>-1</sup>

| [G]      | CH'-1<br>G | CH-1<br>G | CH-6<br>G | CH'-6<br>G | CH-6'<br>G | CH'-6'<br>G | CH-2<br>G | CH-G<br>R | CH-C<br>R | CH-F<br>R |
|----------|------------|-----------|-----------|------------|------------|-------------|-----------|-----------|-----------|-----------|
| 0.00E+00 | -          | -         | -         | -          | -          | -           | -         | 7.8357    | 7.9226    | 7.4617    |
| 1.22E-04 | 4.2508     | 4.1612    | 3.9418    | 3.8358     | 3.7604     | 3.6318      | 3.1133    | -         | 7.9705    | -         |
| 2.32E-04 | 4.2530     | 4.1639    | 3.9418    | 3.8354     | 3.7599     | 3.6312      | 3.1139    | -         | 7.9945    | 7.5777    |
| 4.41E-04 | 4.2692     | 4.1774    | 3.9444    | 3.8405     | 3.7638     | 3.6385      | 3.1248    | -         | 8.0373    | 7.6477    |
| 6.24E-04 | 4.2794     | 4.1871    | 3.9469    | 3.8435     | 3.7664     | 3.6425      | 3.1326    | -         | 8.0729    | 7.6892    |
| 8.82E-04 | 4.2924     | 4.1995    | 3.9502    | 3.8483     | 3.7695     | 3.6487      | 3.1425    | 8.1669    | 8.0976    | 7.7411    |
| 1.25E-03 | 4.3049     | 4.2120    | 3.9531    | 3.8530     | 3.7732     | 3.6545      | 3.1527    | 8.2124    | 8.1238    | 7.7821    |
| 1.76E-03 | 4.3234     | 4.2288    | 3.9570    | 3.8590     | 3.7776     | 3.6624      | 3.1661    | 8.2723    | 8.1561    | 7.8338    |
| 2.49E-03 | 4.3427     | 4.2468    | 3.9612    | 3.8651     | 3.7826     | 3.6708      | 3.1802    | 8.3257    | 8.1848    | 7.8790    |
| 3.52E-03 | 4.3638     | 4.2676    | 3.9659    | 3.8727     | 3.7883     | 3.6791      | 3.1965    | 8.3715    | 8.2095    | 7.9201    |
| 4.98E-03 | 4.3846     | 4.2869    | 3.9701    | 3.8797     | 3.7931     | 3.6904      | 3.2115    | 8.4085    | 8.2300    | 7.9512    |
| 7.04E-03 | 4.4044     | 4.3052    | 3.9746    | 3.8864     | 3.7975     | 3.6993      | 3.2262    | 8.4373    | 8.2470    | 7.9770    |
| 9.95E-03 | 4.4222     | 4.3221    | 3.9789    | 3.8926     | 3.8012     | 3.7077      | 3.2393    | 8.4594    | 8.2603    | 7.9972    |
| 1.41E-02 | 4.4380     | 4.3368    | 3.9820    | 3.8976     | 3.8041     | 3.7150      | 3.2509    | 8.4757    | 8.2704    | 8.0126    |
| 1.99E-02 | 4.4478     | 4.3460    | 3.9846    | 3.9010     | 3.8080     | 3.7195      | 3.2585    | 8.4863    | 8.2775    | 8.0219    |
| 2.81E-02 | 4.4597     | 4.3574    | 3.9867    | 3.9051     | 3.8122     | 3.7247      | 3.2678    | 8.4964    | 8.2828    | 8.0316    |

## Results page

no. of spectra            16  
 no. of resonance values 148  
 no. of resonant nuclei   10

sigma =    0.00181807032                      RMS weighted residual =    0.00158861640

|      | stoich |   | value    | relative    | log    | standard  |         |
|------|--------|---|----------|-------------|--------|-----------|---------|
|      | coeff  |   |          | std devn    | beta   | deviation |         |
| Beta | 0      | 2 | constant | 4.4208E+002 |        | 2.6455    | ( R2 )  |
| Beta | 1      | 1 | refined  | 3.4165E+002 | 0.1680 | 2.5336    | ( GR )  |
| Beta | 1      | 2 | refined  | 2.1265E+006 | 0.1447 | 6.3277    | ( GR2 ) |

### Individual chemical shifts

| G      |   |        |        | R      |        |
|--------|---|--------|--------|--------|--------|
|        | + | value  | error  | value  | error  |
| CH'-1  | + | 4.5038 | 0.0044 |        |        |
| CH-1   | + | 4.3992 | 0.0042 |        |        |
| CH-6   | + | 3.9969 | 0.0019 |        |        |
| CH'-6  | + | 3.9205 | 0.0022 |        |        |
| CH-6'  | + | 3.8219 | 0.0020 |        |        |
| CH'-6' | + | 3.7458 | 0.0026 |        |        |
| CH-2   | + | 3.3007 | 0.0035 |        |        |
| CH-G   | + |        |        | 7.5399 | 0.1320 |
| CH-C   | + |        |        | 7.7988 | 0.0778 |
| CH-F   | + |        |        | 7.2183 | 0.1163 |
|        | + |        |        |        |        |

| 0,2    |   |        |        | 1,1    |        |
|--------|---|--------|--------|--------|--------|
|        | + | value  | error  | value  | error  |
| CH'-1  | + |        |        | 0.7438 | 0.6846 |
| CH-1   | + |        |        | 0.8403 | 0.6484 |
| CH-6   | + |        |        | 3.1554 | 0.1679 |
| CH'-6  | + |        |        | 2.6206 | 0.2457 |
| CH-6'  | + |        |        | 2.8986 | 0.1814 |
| CH'-6' | + |        |        | 1.9671 | 0.3298 |
| CH-2   | + |        |        | 0.4787 | 0.5160 |
| CH-G   | + | 8.7195 | 0.3943 | 8.4876 | 0.0163 |
| CH-C   | + | 8.3034 | 0.2330 | 8.2915 | 0.0082 |
| CH-F   | + | 8.1956 | 0.3475 | 8.0330 | 0.0134 |
|        | + |        |        |        |        |

| 1,2    |   |        |        |
|--------|---|--------|--------|
|        | + | value  | error  |
| CH'-1  | + | 4.8811 | 0.0342 |
| CH-1   | + | 4.7639 | 0.0344 |
| CH-6   | + | 4.0873 | 0.0315 |
| CH'-6  | + | 4.0621 | 0.0319 |
| CH-6'  | + | 3.9142 | 0.0314 |
| CH'-6' | + | 3.9525 | 0.0331 |
| CH-2   | + | 3.5928 | 0.0334 |
| CH-G   | + | 8.7434 | 0.0238 |
| CH-C   | + | 8.3830 | 0.0199 |
| CH-F   | + | 8.2233 | 0.0227 |

### Correlation coefficients\*1000

|   |      |
|---|------|
| 1 | 2    |
| 1 |      |
| 2 | -255 |

Parameters are numbered as follows

1 beta 1,1  
 2 beta 1,2

## Titration Plots

Chemical shifts ( $\delta$ , ppm) vs. concentration of G (mol L<sup>-1</sup>)

experimental (symbols) and calculated (lines) values

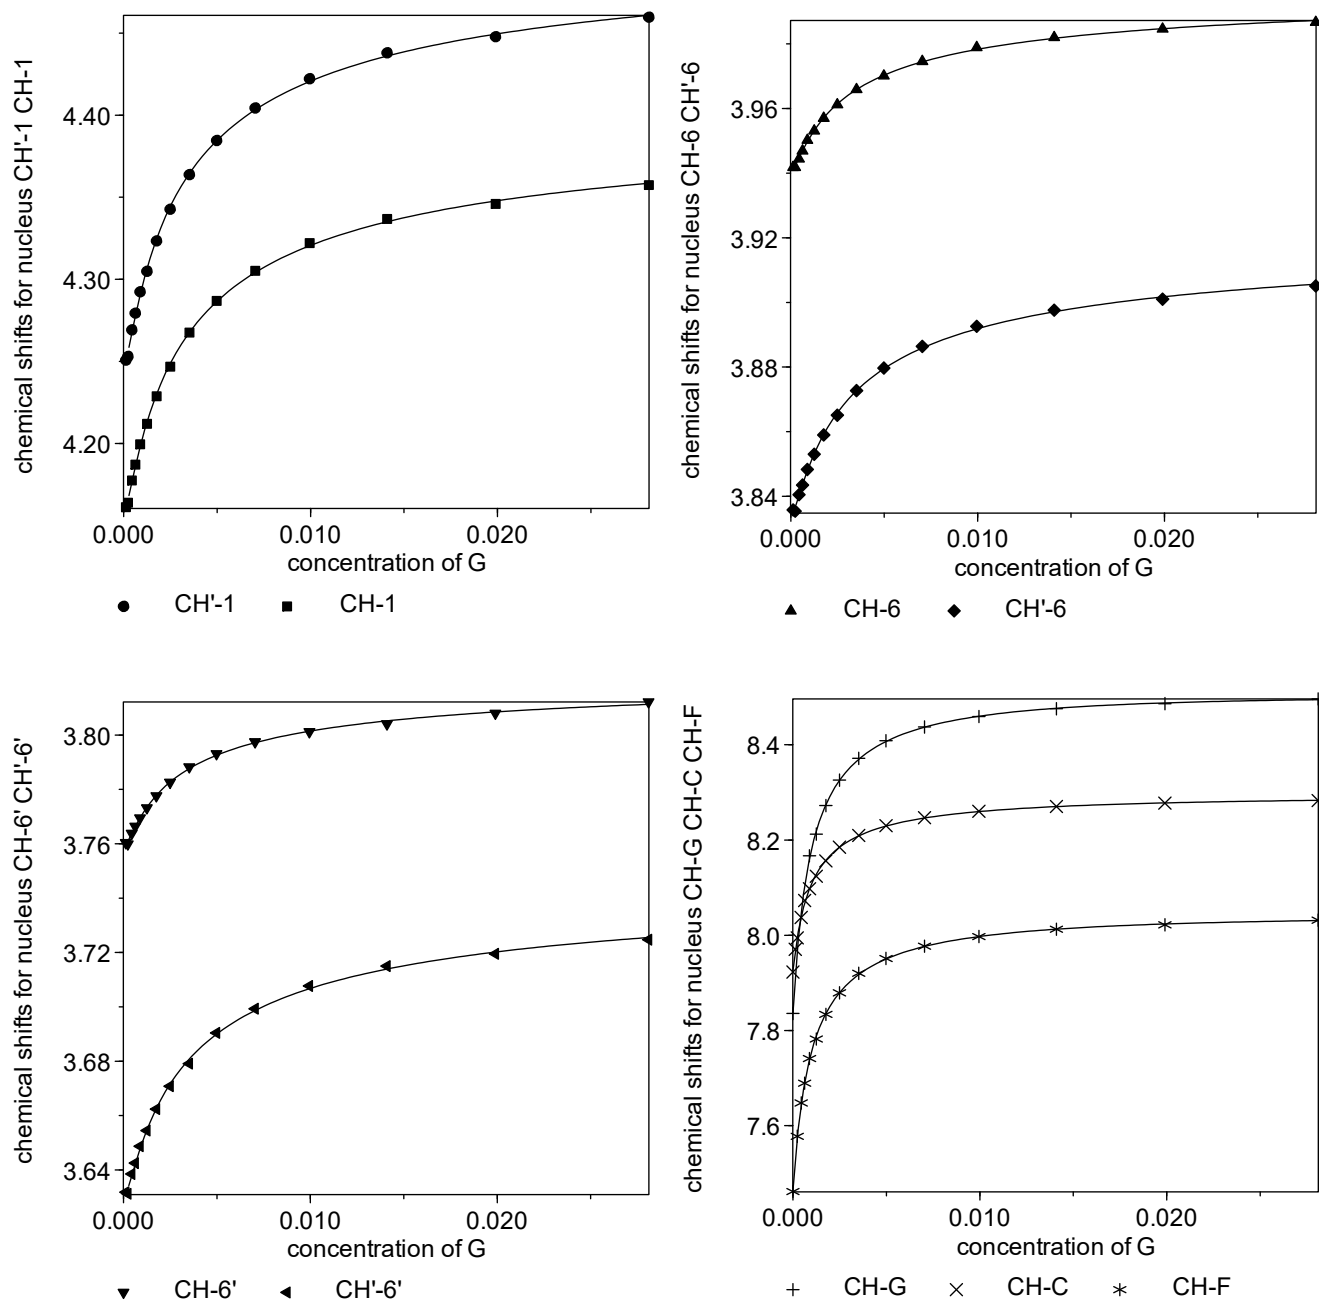

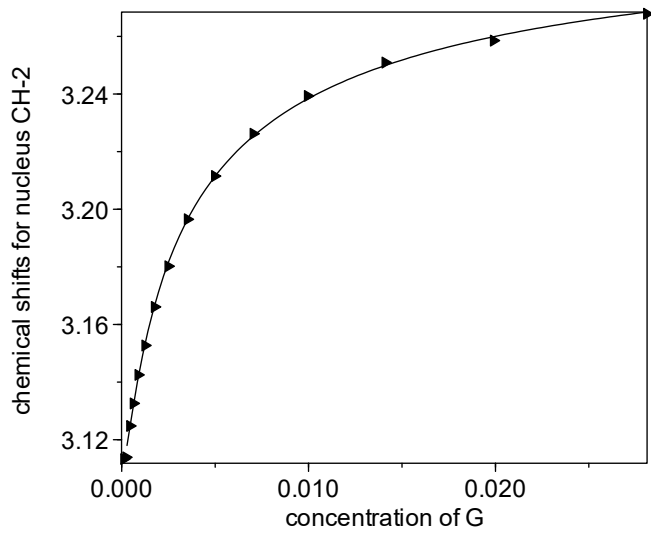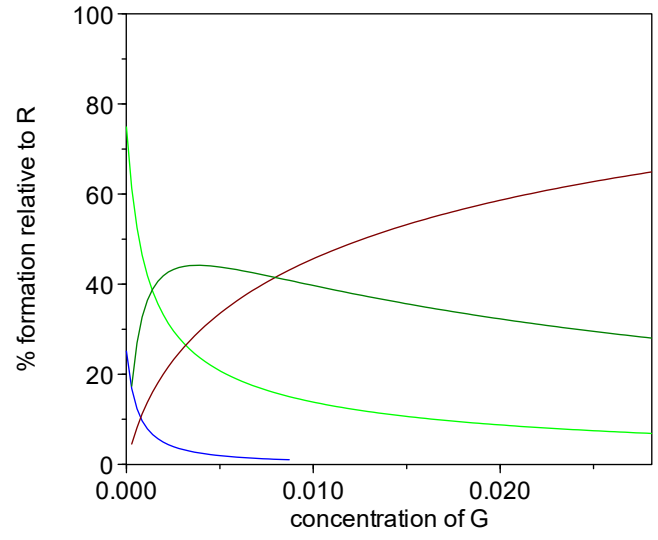

**R**    **R<sub>2</sub>**    **GR**    **GR<sub>2</sub>**

**1 + Me $\beta$ CeB (D<sub>2</sub>O, pD 11, 298 K, 500 MHz).**

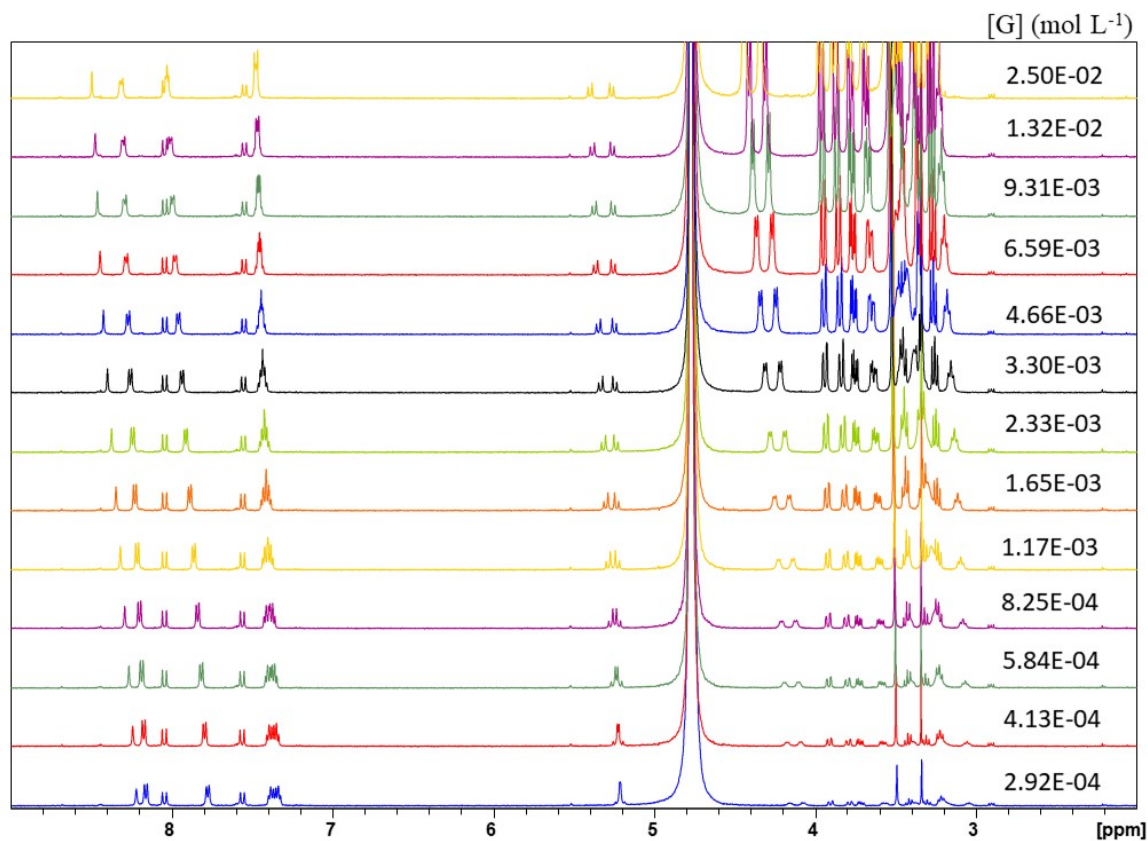

**Figure S9.** <sup>1</sup>H NMR spectroscopic titration (500 MHz, D<sub>2</sub>O, pD 11, 298 K) of receptor **1** ( $5.55 \cdot 10^{-4}$  mol L<sup>-1</sup>) with incremental concentrations of Me $\beta$ CeB (G).

### Data Table

R = 1 G = MeßCeB

$\delta$  (ppm) vs. [G] (mol L<sup>-1</sup>)

Titration [R] = 5.55 10<sup>-4</sup> mol L<sup>-1</sup>

| [G]      | CH'-1<br>G | CH-1<br>G | CH-6<br>G | CH'-6<br>G | CH-6'<br>G | CH'-6'<br>G | CH-2<br>G | CH-G<br>R | CH-C<br>R | CH-F<br>R |
|----------|------------|-----------|-----------|------------|------------|-------------|-----------|-----------|-----------|-----------|
| 2.92E-04 | 4.1655     | 4.0841    | 3.9193    | 3.7996     | 3.7347     | 3.5884      | 3.0446    | 8.2206    | 8.1711    | 7.7858    |
| 4.13E-04 | 4.1793     | 4.0969    | 3.9233    | 3.8054     | 3.7388     | 3.5960      | 3.0559    | 8.2429    | 8.1833    | 7.8045    |
| 5.84E-04 | 4.1946     | 4.1104    | 3.9266    | 3.8100     | 3.7428     | 3.6031      | 3.0667    | 8.2665    | 8.1965    | 7.8252    |
| 8.25E-04 | 4.2150     | 4.1277    | 3.9307    | 3.8170     | 3.7475     | 3.6110      | 3.0812    | 8.2929    | 8.2097    | 7.8477    |
| 1.17E-03 | 4.2372     | 4.1492    | 3.9356    | 3.8244     | 3.7534     | 3.6213      | 3.0975    | 8.3201    | 8.2245    | 7.8718    |
| 1.65E-03 | 4.2624     | 4.1724    | 3.9410    | 3.8331     | 3.7594     | 3.6325      | 3.1163    | 8.3476    | 8.2385    | 7.8966    |
| 2.33E-03 | 4.2902     | 4.1988    | 3.9476    | 3.8431     | 3.7666     | 3.6448      | 3.1360    | 8.3755    | 8.2532    | 7.9221    |
| 3.30E-03 | 4.3196     | 4.2261    | 3.9539    | 3.8529     | 3.7740     | 3.6576      | 3.1582    | 8.4005    | 8.2666    | 7.9459    |
| 4.66E-03 | 4.3494     | 4.2535    | 3.9604    | 3.8627     | 3.7820     | 3.6692      | 3.1796    | 8.4260    | 8.2806    | 7.9691    |
| 6.59E-03 | 4.3761     | 4.2791    | 3.9663    | 3.8722     | 3.7885     | 3.6808      | 3.1996    | 8.4464    | 8.2919    | 7.9893    |
| 9.31E-03 | 4.3999     | 4.3019    | 3.9714    | 3.8808     | 3.7942     | 3.6938      | 3.2177    | 8.4632    | 8.3006    | 8.0054    |
| 1.32E-02 | 4.4204     | 4.3210    | 3.9761    | 3.8880     | 3.7983     | 3.7033      | 3.2323    | 8.4768    | 8.3080    | 8.0186    |
| 2.50E-02 | 4.4529     | 4.3511    | 3.9829    | 3.8992     | 3.8054     | 3.7182      | 3.2563    | 8.4969    | 8.3209    | 8.0309    |

## Results page

no. of spectra            14  
 no. of resonance values 130  
 no. of resonant nuclei    10

Chi-squared =    6.98

|         |              |               |                         |        |               |         |
|---------|--------------|---------------|-------------------------|--------|---------------|---------|
| sigma = |              | 0.00097912641 | RMS weighted residual = |        | 0.00083700662 |         |
|         | stoich       | value         | relative                | log    | standard      |         |
|         | coeff        |               | std devn                | beta   | deviation     |         |
| Beta    | 0 2 constant | 1.4666E+003   |                         | 3.1663 |               | ( R2 )  |
| Beta    | 1 1 refined  | 3.1598E+002   | 0.1775                  | 2.4997 | 0.0771        | ( GR )  |
| Beta    | 1 2 refined  | 2.8496E+006   | 0.2383                  | 6.4548 | 0.1035        | ( GR2 ) |

### Individual chemical shifts

| G      |   |        | R      |         |        |
|--------|---|--------|--------|---------|--------|
|        | + | value  | error  | value   | error  |
| CH'-1  | + | 4.5196 | 0.0058 |         |        |
| CH-1   | + | 4.4154 | 0.0055 |         |        |
| CH-6   | + | 3.9975 | 0.0019 |         |        |
| CH'-6  | + | 3.9225 | 0.0024 |         |        |
| CH-6'  | + | 3.8215 | 0.0020 |         |        |
| CH'-6' | + | 3.7481 | 0.0029 |         |        |
| CH-2   | + | 3.3058 | 0.0044 |         |        |
| CH-G   | + |        |        | 7.9930  | 0.2024 |
| CH-C   | + |        |        | 8.0909  | 0.1167 |
| CH-F   | + |        |        | 7.3215  | 0.1554 |
| 0,2    |   |        | 1,1    |         |        |
| =====  |   |        |        |         |        |
|        | + | value  | error  | value   | error  |
| CH'-1  | + |        |        | -0.9746 | 1.1777 |
| CH-1   | + |        |        | -0.8523 | 1.1225 |
| CH-6   | + |        |        | 2.8082  | 0.2650 |
| CH'-6  | + |        |        | 1.9944  | 0.4170 |
| CH-6'  | + |        |        | 2.5673  | 0.2828 |
| CH'-6' | + |        |        | 1.2173  | 0.5421 |
| CH-2   | + |        |        | -0.7689 | 0.8729 |
| CH-G   | + | 8.3548 | 0.2306 | 8.5330  | 0.0093 |
| CH-C   | + | 8.1952 | 0.1337 | 8.3491  | 0.0071 |
| CH-F   | + | 8.2206 | 0.1799 | 8.0364  | 0.0121 |
| 1,2    |   |        |        |         |        |
| =====  |   |        |        |         |        |
|        | + | value  | error  |         |        |
| CH'-1  | + | 4.5074 | 0.1530 |         |        |
| CH-1   | + | 4.4573 | 0.1320 |         |        |
| CH-6   | + | 3.9878 | 0.0435 |         |        |
| CH'-6  | + | 3.9309 | 0.0559 |         |        |
| CH-6'  | + | 3.7791 | 0.0527 |         |        |
| CH'-6' | + | 3.7742 | 0.0659 |         |        |
| CH-2   | + | 3.3105 | 0.1110 |         |        |
| CH-G   | + | 8.5420 | 0.0368 |         |        |
| CH-C   | + | 8.3256 | 0.0253 |         |        |
| CH-F   | + | 8.1530 | 0.0192 |         |        |

### Correlation coefficients\*1000

|   |     |   |
|---|-----|---|
|   | 1   | 2 |
| 1 |     |   |
| 2 | -79 |   |

Parameters are numbered as follows

1 beta 1,1  
 2 beta 1,2

### Titration Plots

Chemical shifts ( $\delta$ , ppm) vs. concentration of G (mol L<sup>-1</sup>)

experimental (symbols) and calculated (lines) values

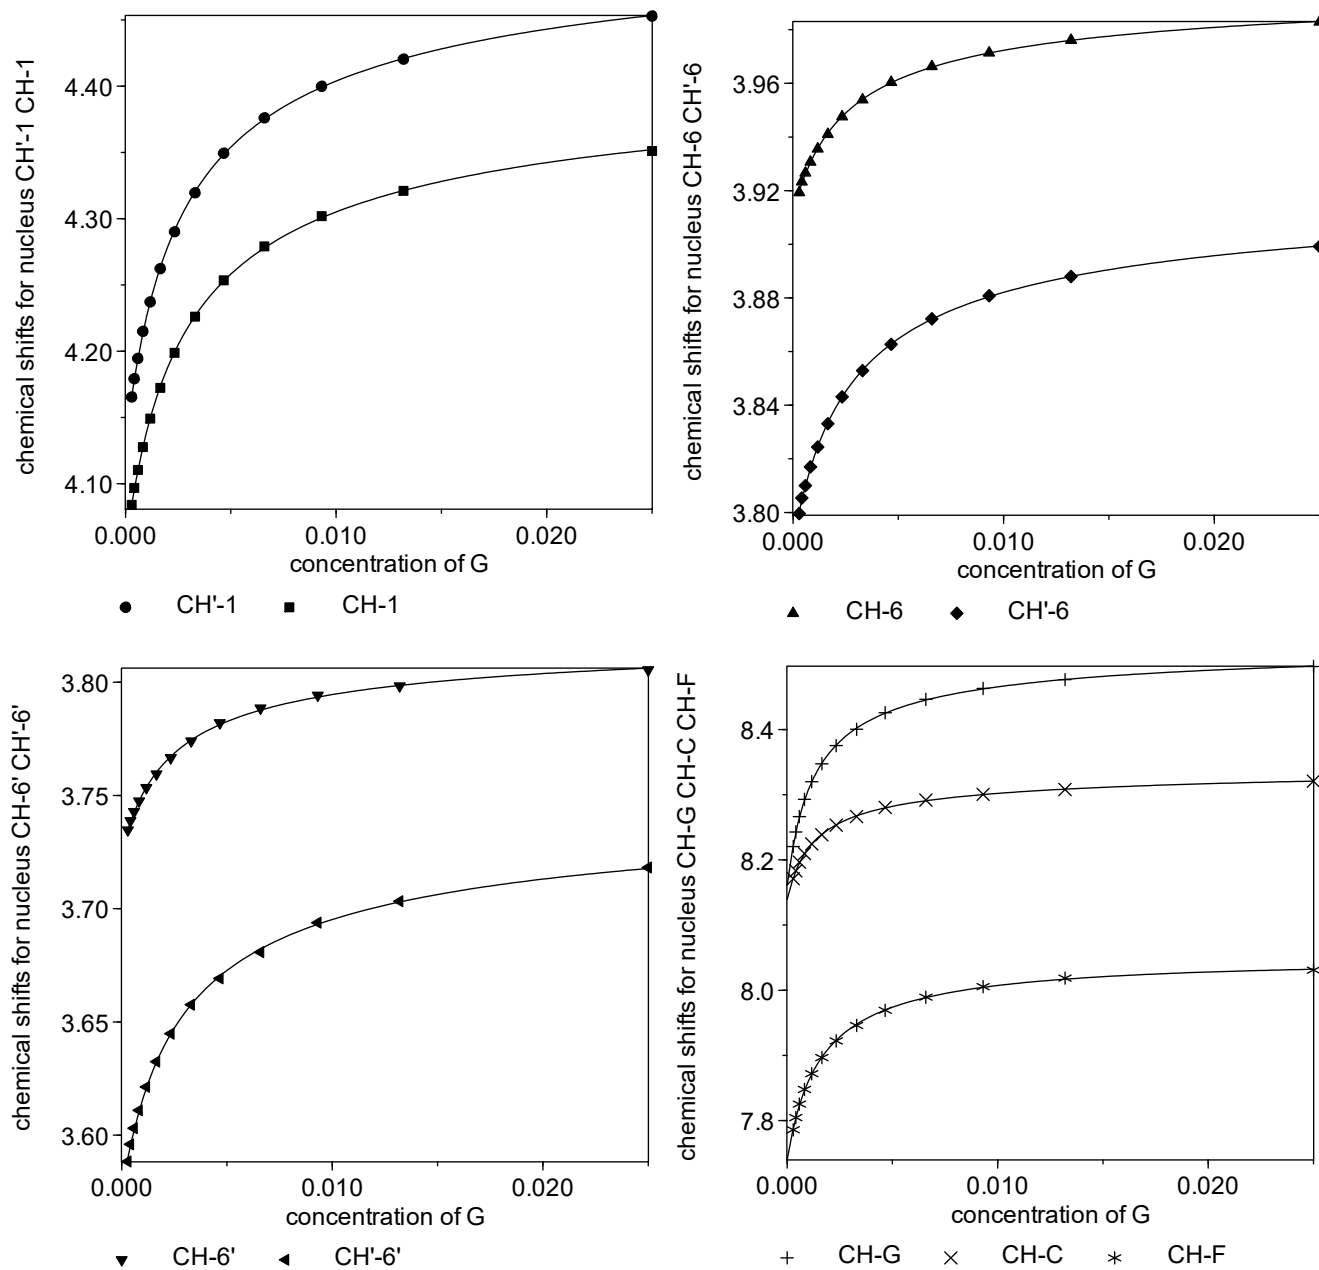



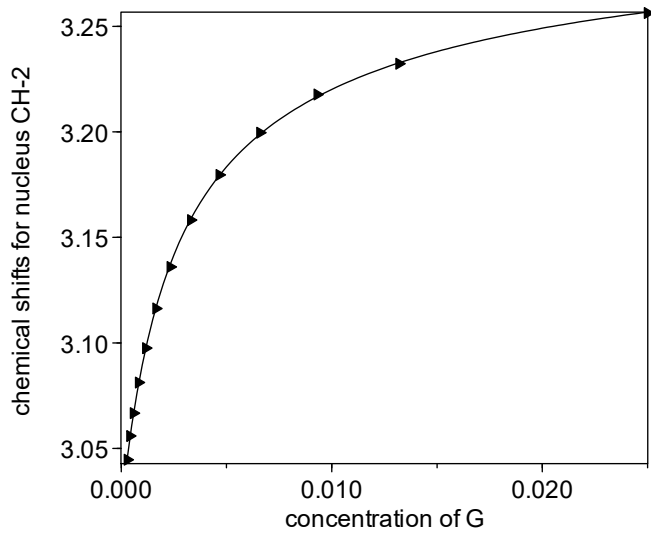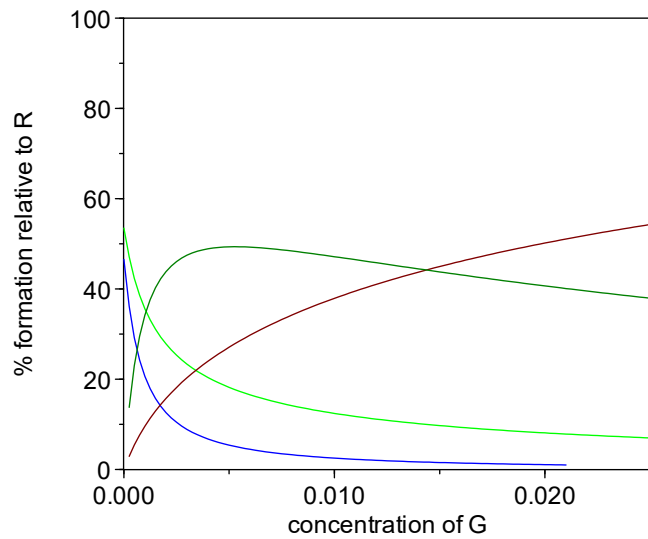

**R**    **R<sub>2</sub>**    **GR**    **GR<sub>2</sub>**

**1 + Me $\beta$ Mal (D<sub>2</sub>O, pD 7.4, 298 K, 500 MHz).**

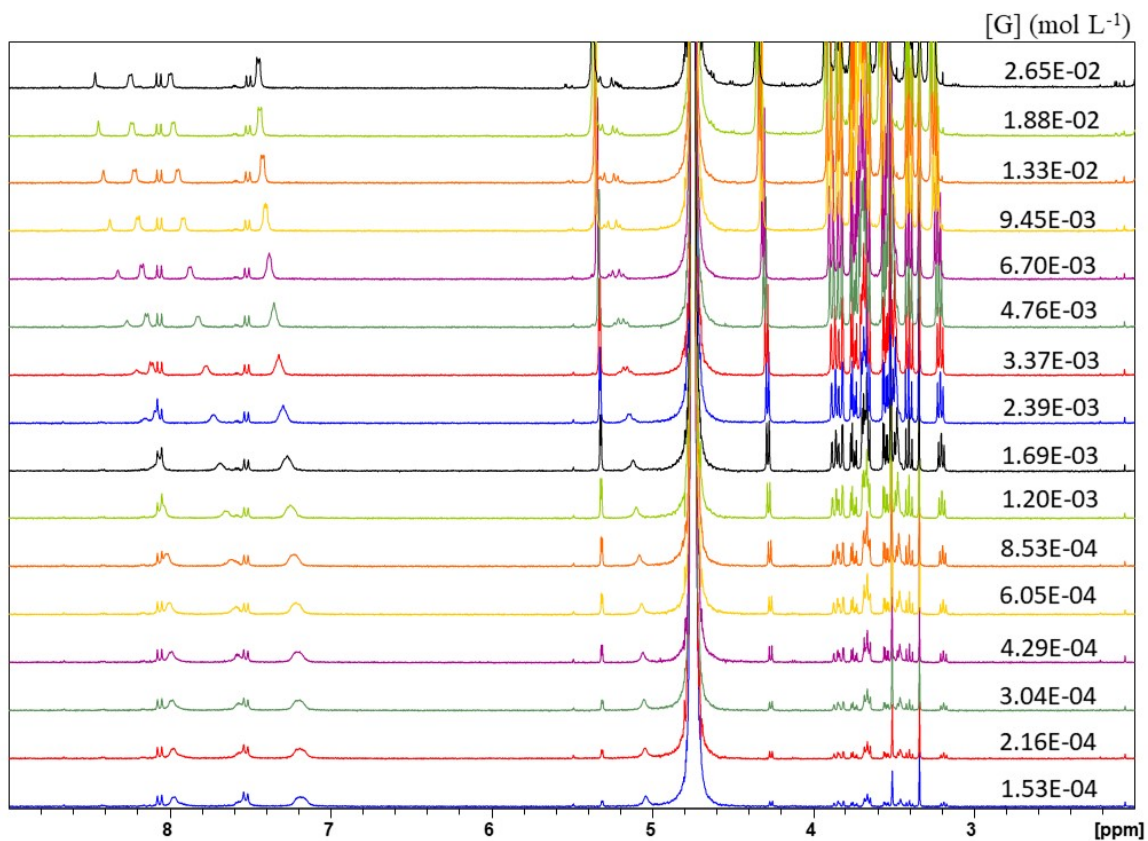

**Figure S10.** <sup>1</sup>H NMR spectroscopic titration (500 MHz, D<sub>2</sub>O, pD 7.4, 298 K) of receptor **1** ( $4.01 \cdot 10^{-4}$  mol L<sup>-1</sup>) with incremental concentrations of Me $\beta$ Mal (G).

### Data Table

R = 1 G = MeßMal

$\delta$  (ppm) vs. [G] (mol L<sup>-1</sup>)

Titration [R] = 4.01 10<sup>-4</sup> mol L<sup>-1</sup>

| [G]      | CH'-1<br>G | CH-1<br>G | CH-6<br>G | CH'-6<br>G | CH-6'<br>G | CH'-6'<br>G | CH-2<br>G | CH-G<br>R | CH-C<br>R | CH-F<br>R |
|----------|------------|-----------|-----------|------------|------------|-------------|-----------|-----------|-----------|-----------|
| 1.53E-04 | 5.3133     | 4.2729    | 3.8724    | 3.8149     | 3.5109     | 3.1897      | 7.9759    | -         | 7.5625    | 7.1870    |
| 2.16E-04 | 5.3147     | 4.2739    | 3.8730    | 3.8150     | 3.5114     | 3.1903      | 7.9882    | -         | 7.5692    | 7.1923    |
| 3.04E-04 | 5.3152     | 4.2746    | 3.8736    | 3.8154     | 3.5118     | 3.1911      | 7.9883    | -         | 7.5738    | 7.2025    |
| 4.29E-04 | 5.3163     | 4.2761    | 3.8749    | 3.8156     | 3.5125     | 3.1927      | 7.9931    | -         | 7.5810    | 7.2055    |
| 6.05E-04 | 5.3175     | 4.2778    | 3.8758    | 3.8157     | 3.5132     | 3.1939      | 8.0041    | -         | 7.5882    | 7.2162    |
| 8.53E-04 | 5.3190     | 4.2801    | 3.8771    | 3.8162     | 3.5142     | 3.1963      | 8.0208    | -         | 7.6147    | 7.2284    |
| 1.20E-03 | 5.3219     | 4.2844    | 3.8802    | 3.8168     | 3.5163     | 3.1996      | -         | -         | 7.6505    | 7.2498    |
| 1.69E-03 | 5.3251     | 4.2890    | 3.8831    | 3.8178     | 3.5184     | 3.2033      | -         | 8.1146    | 7.6874    | 7.2702    |
| 2.39E-03 | 5.3290     | 4.2945    | 3.8867    | 3.8189     | 3.5210     | 3.2080      | 8.0880    | 8.1537    | 7.7284    | 7.2952    |
| 3.37E-03 | 5.3336     | 4.3013    | 3.8914    | 3.8199     | 3.5240     | 3.2139      | 8.1151    | 8.2074    | 7.7767    | 7.3240    |
| 4.76E-03 | 5.3396     | 4.3099    | 3.8967    | 3.8216     | 3.5279     | 3.2209      | 8.1452    | 8.2669    | 7.8258    | 7.3533    |
| 6.70E-03 | 5.3463     | 4.3196    | 3.9029    | 3.8232     | 3.5323     | 3.2289      | 8.1734    | 8.3227    | 7.8748    | 7.3815    |
| 9.45E-03 | 5.3539     | 4.3308    | 3.9103    | 3.8251     | 3.5373     | 3.2383      | 8.1988    | 8.3729    | 7.9173    | 7.4057    |
| 1.33E-02 | 5.3618     | 4.3419    | 3.9175    | 3.8274     | 3.5425     | 3.2474      | 8.2204    | 8.4142    | 7.9523    | 7.4251    |
| 1.88E-02 | 5.3685     | 4.3517    | 3.9236    | 3.8287     | 3.5467     | 3.2559      | 8.2355    | 8.4441    | 7.9787    | 7.4406    |
| 2.65E-02 | 5.3739     | 4.3597    | 3.9289    | 3.8303     | 3.5502     | 3.2623      | 8.2465    | 8.4650    | 7.9971    | 7.4501    |

## Results page

no. of spectra            16  
 no. of resonance values 151  
 no. of resonant nuclei   10

sigma =    0.00194509826                      RMS weighted residual =    0.00177679918

|      | stoich       | value       | relative | log    | standard  |        |
|------|--------------|-------------|----------|--------|-----------|--------|
|      | coeff        |             | std devn | beta   | deviation |        |
| Beta | 1 1 refined  | 1.8579E+002 | 0.0334   | 2.2690 | 0.0145    | ( GR ) |
| Beta | 0 2 constant | 4.4208E+002 |          | 2.6455 |           | ( R2 ) |

### Individual chemical shifts

| G     |       |        | R      |        |        |
|-------|-------|--------|--------|--------|--------|
|       | value | error  | value  | error  |        |
| ===== |       |        |        |        |        |
| CH'-1 | +     | 5.3910 | 0.0017 |        |        |
| CH-1  | +     | 4.3842 | 0.0019 |        |        |
| CH-6  | +     | 3.9449 | 0.0017 |        |        |
| CH'-6 | +     | 3.8347 | 0.0015 |        |        |
| CH3   | +     | 3.5615 | 0.0016 |        |        |
| CH-2  | +     | 3.2830 | 0.0018 |        |        |
| CH-C  | +     |        |        | 8.2716 | 0.0258 |
| CH-G  | +     |        |        | 8.3829 | 0.0383 |
| CH-F  | +     |        |        | 7.9889 | 0.0387 |
| CH-B  | +     |        |        | 7.4950 | 0.0258 |
|       | +     |        |        |        |        |
|       |       | 1,1    | 0,2    |        |        |
| ===== |       |        |        |        |        |
| CH'-1 | +     | 3.9648 | 0.0662 |        |        |
| CH-1  | +     | 2.3238 | 0.0890 |        |        |
| CH-6  | +     | 2.6062 | 0.0632 |        |        |
| CH'-6 | +     | 3.4697 | 0.0365 |        |        |
| CH3   | +     | 2.6269 | 0.0502 |        |        |
| CH-2  | +     | 1.5599 | 0.0766 |        |        |
| CH-C  | +     | 8.2561 | 0.0048 | 6.8802 | 0.0934 |
| CH-G  | +     | 8.5083 | 0.0059 | 6.4217 | 0.1399 |
| CH-F  | +     | 8.0230 | 0.0061 | 5.9277 | 0.1386 |
| CH-B  | +     | 7.4560 | 0.0048 | 6.0455 | 0.0934 |

## Titration Plots

Chemical shifts ( $\delta$ , ppm) vs. concentration of G (mol L<sup>-1</sup>)

experimental (symbols) and calculated (lines) values

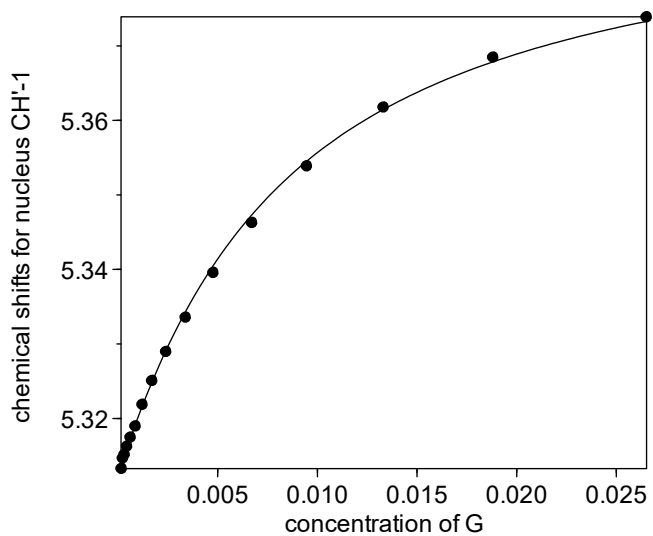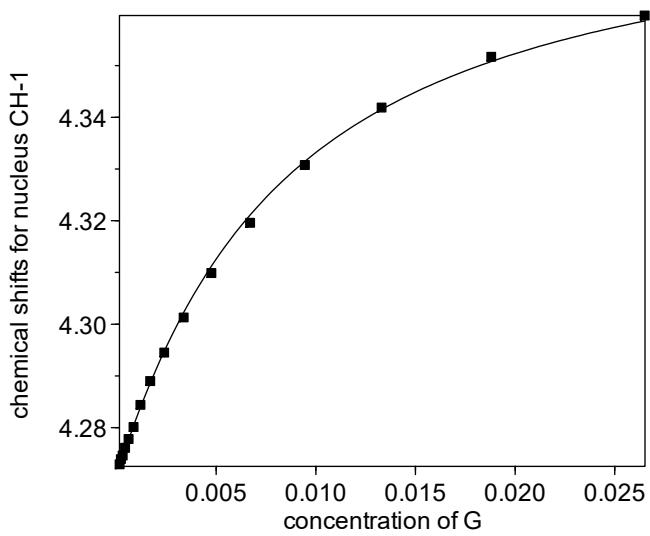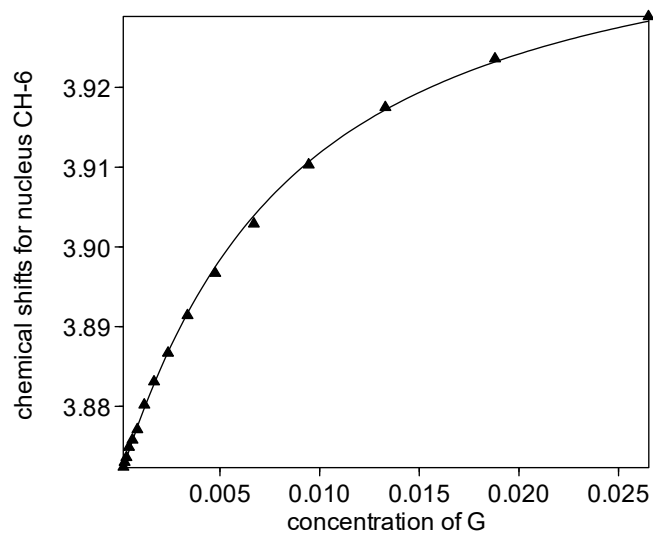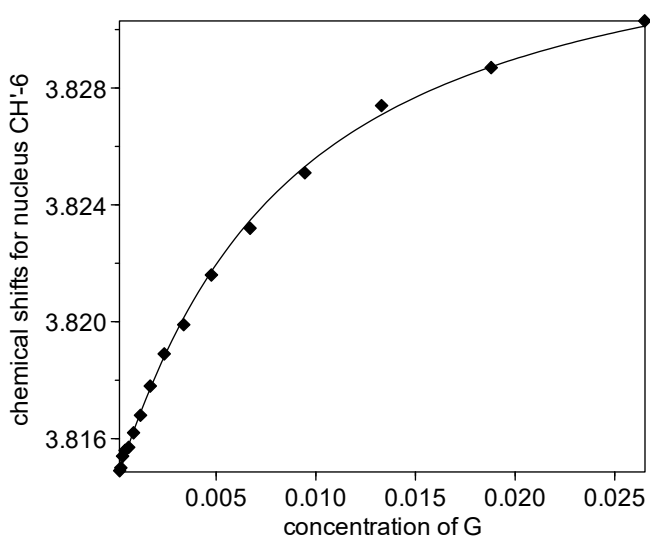

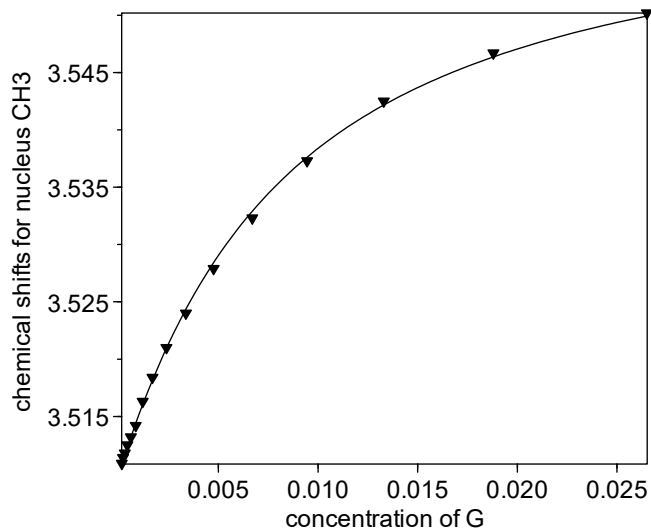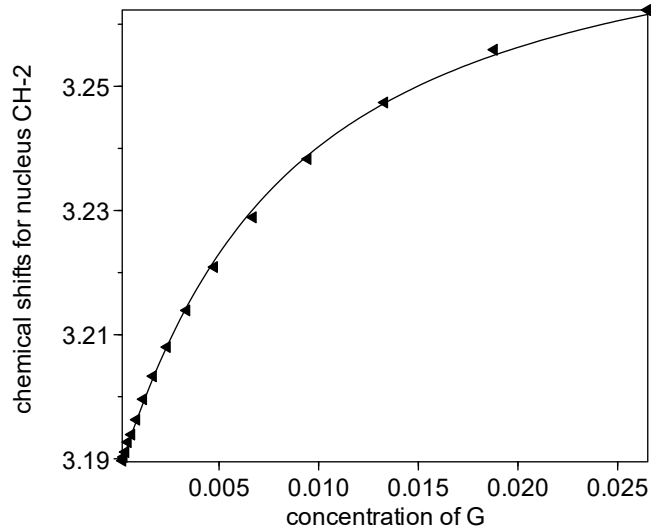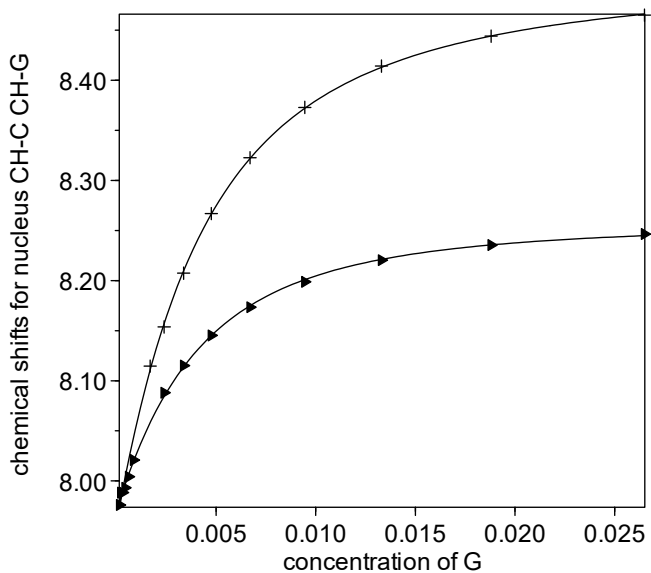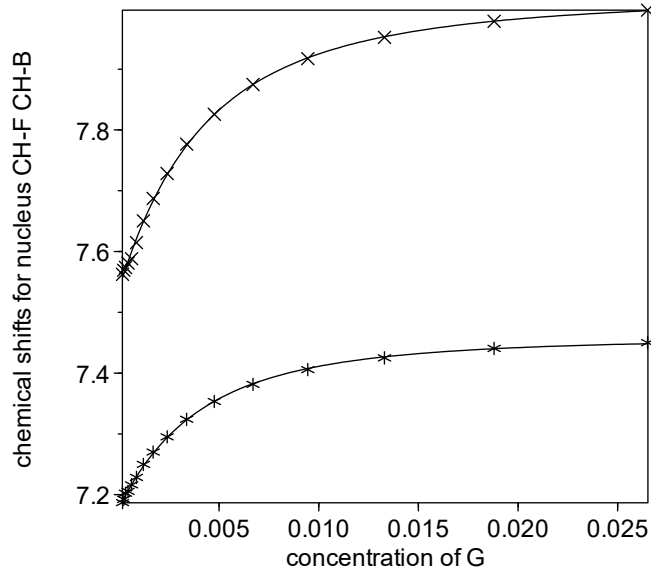

▶ CH-C + CH-G

× CH-F \* CH-B

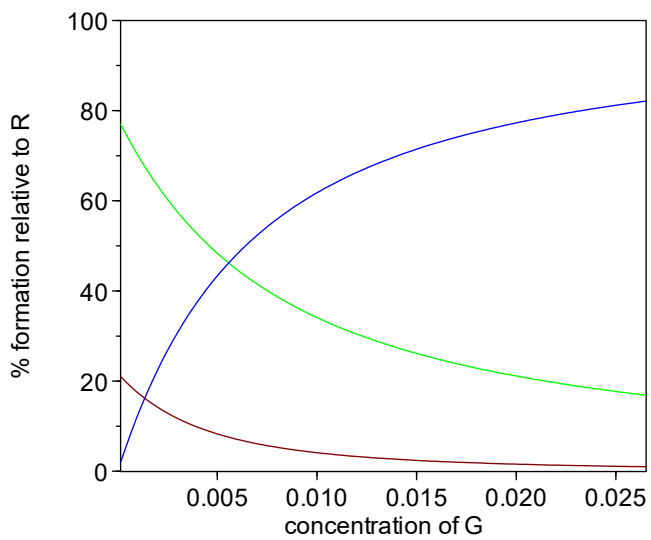

R GR R<sub>2</sub>

**1 + Me $\beta$ Lac (D<sub>2</sub>O, pD 7.4, 298 K, 500 MHz).**

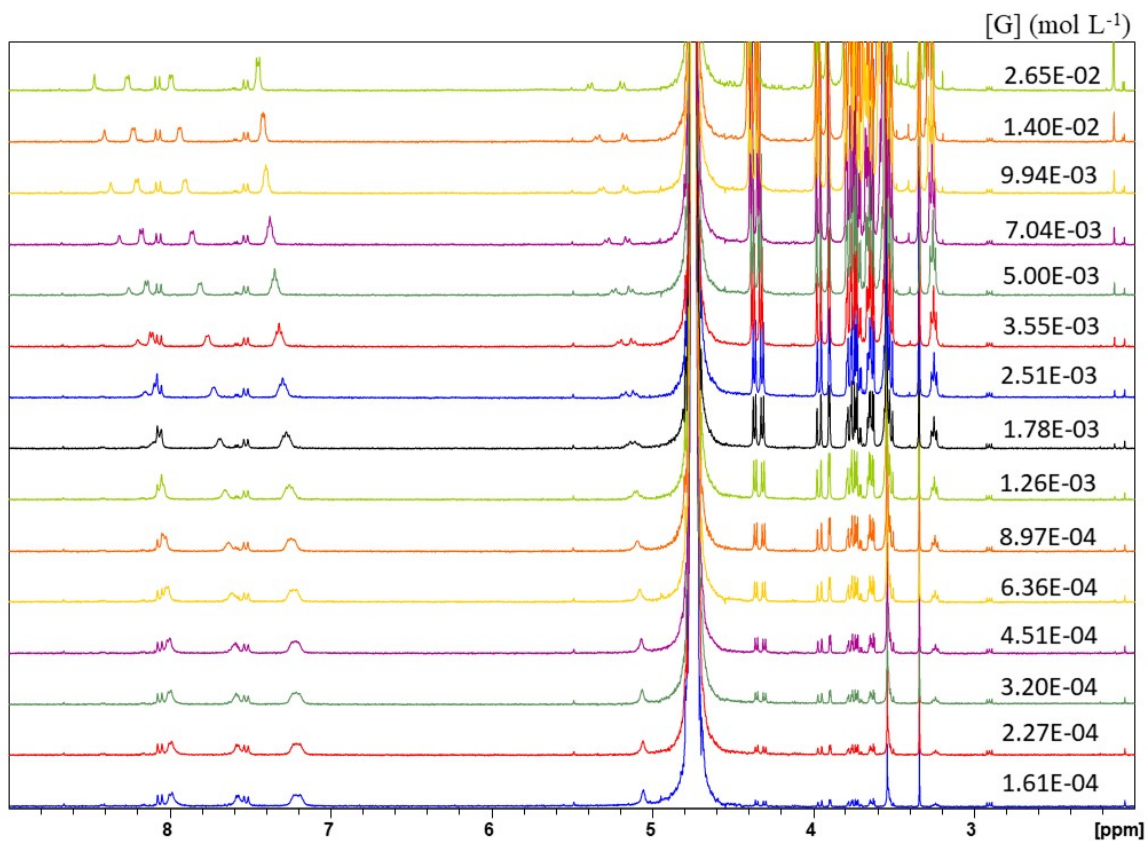

**Figure S11.** <sup>1</sup>H NMR spectroscopic titration (500 MHz, D<sub>2</sub>O, pD 7.4, 298 K) of receptor **1** ( $4.22 \cdot 10^{-4}$  mol L<sup>-1</sup>) with incremental concentrations of Me $\beta$ Lac (G).

### Data Table

R = 1 G = Me $\beta$ Lac

$\delta$  (ppm) vs. [G] (mol L<sup>-1</sup>)

Titration [R] = 4.22 10<sup>-4</sup> mol L<sup>-1</sup>

| [G]      | CH'-1<br>G | CH-1<br>G | CH-6<br>G | CH'-4<br>G | CH3<br>G | CH-2<br>G | CH-C<br>R | CH-G<br>R | CH-F<br>R |
|----------|------------|-----------|-----------|------------|----------|-----------|-----------|-----------|-----------|
| 1.61E-04 | 4.3631     | 4.3134    | 3.9732    | 3.8984     | 3.5420   | 3.2404    | 7.9943    | -         | 7.5810    |
| 2.27E-04 | 4.3635     | 4.3139    | 3.9738    | 3.8986     | 3.5421   | 3.2412    | 7.9965    | -         | 7.5811    |
| 3.20E-04 | 4.3639     | 4.3146    | 3.9740    | 3.8987     | 3.5423   | 3.2418    | 8.0020    | -         | 7.5849    |
| 4.51E-04 | 4.3647     | 4.3155    | 3.9742    | 3.8989     | 3.5425   | 3.2424    | 8.0078    | -         | 7.5916    |
| 6.36E-04 | 4.3661     | 4.3170    | 3.9745    | 3.8991     | 3.5429   | 3.2431    | 8.0178    | -         | 7.6140    |
| 8.97E-04 | 4.3679     | 4.3189    | 3.9749    | 3.8994     | 3.5434   | 3.2443    | 8.0304    | -         | 7.6329    |
| 1.26E-03 | 4.3698     | 4.3211    | 3.9753    | 3.9000     | 3.5440   | 3.2459    | -         | -         | 7.6567    |
| 1.78E-03 | 4.3727     | 4.3243    | 3.9760    | 3.9007     | 3.5449   | 3.2481    | -         | 8.1005    | 7.6896    |
| 2.51E-03 | 4.3764     | 4.3284    | 3.9772    | 3.9015     | 3.5461   | 3.2509    | 8.0897    | 8.1544    | 7.7264    |
| 3.55E-03 | 4.3809     | 4.3333    | 3.9779    | 3.9026     | 3.5474   | 3.2539    | 8.1152    | 8.1998    | 7.7679    |
| 5.00E-03 | 4.3868     | 4.3401    | 3.9801    | 3.9040     | 3.5491   | 3.2586    | 8.1450    | 8.2565    | 7.8135    |
| 7.04E-03 | 4.3936     | 4.3477    | 3.9817    | 3.9055     | 3.5511   | 3.2635    | 8.1763    | 8.3132    | 7.8618    |
| 9.94E-03 | 4.4013     | 4.3561    | 3.9837    | 3.9071     | 3.5533   | 3.2690    | 8.2050    | 8.3671    | 7.9065    |
| 1.40E-02 | 4.4077     | 4.3633    | 3.9853    | 3.9086     | 3.5552   | 3.2737    | 8.2272    | 8.4065    | 7.9407    |
| 2.65E-02 | 4.4200     | 4.3770    | 3.9884    | 3.9112     | 3.5586   | 3.2828    | 8.2644    | 8.4694    | 7.9930    |



## Results page

no. of spectra            15  
 no. of resonance values 126  
 no. of resonant nuclei    9

sigma =    0.00148779121                      RMS weighted residual =    0.00135167844

|      | stoich |          | value       | relative | log    | standard  |        |
|------|--------|----------|-------------|----------|--------|-----------|--------|
|      | coeff  |          |             | std devn | beta   | deviation |        |
| Beta | 1 1    | refined  | 1.8642E+002 | 0.0450   | 2.2705 | 0.0195    | ( GR ) |
| Beta | 0 2    | constant | 4.4208E+002 |          | 2.6455 |           | ( R2 ) |

Individual chemical shifts

| G     |   |        |        | R      |        |
|-------|---|--------|--------|--------|--------|
| ===== |   |        |        |        |        |
|       | + | value  | error  | value  | error  |
| CH'-1 | + | 4.4349 | 0.0017 |        |        |
| CH-1  | + | 4.3936 | 0.0018 |        |        |
| CH-6  | + | 3.9924 | 0.0013 |        |        |
| CH'-4 | + | 3.9147 | 0.0013 |        |        |
| CH3   | + | 3.5632 | 0.0013 |        |        |
| CH-2  | + | 3.2938 | 0.0015 |        |        |
| CH-C  | + |        |        | 8.1092 | 0.0283 |
| CH-G  | + |        |        | 8.2328 | 0.0459 |
| CH-F  | + |        |        | 7.8012 | 0.0435 |
|       | + |        |        |        |        |
|       |   | 1,1    |        | 0,2    |        |
| ===== |   |        |        |        |        |
|       | + | value  | error  | value  | error  |
| CH'-1 | + | 3.1512 | 0.0752 |        |        |
| CH-1  | + | 2.9625 | 0.0828 |        |        |
| CH-6  | + | 3.6562 | 0.0326 |        |        |
| CH'-4 | + | 3.6244 | 0.0313 |        |        |
| CH3   | + | 3.1858 | 0.0339 |        |        |
| CH-2  | + | 2.3484 | 0.0583 |        |        |
| CH-C  | + | 8.3035 | 0.0038 | 7.5589 | 0.0978 |
| CH-G  | + | 8.5352 | 0.0052 | 7.0000 | 0.1556 |
| CH-F  | + | 8.0467 | 0.0052 | 6.7354 | 0.1496 |

## Titration Plots

Chemical shifts ( $\delta$ , ppm) vs. concentration of G ( $\text{mol L}^{-1}$ )

experimental (symbols) and calculated (lines) values

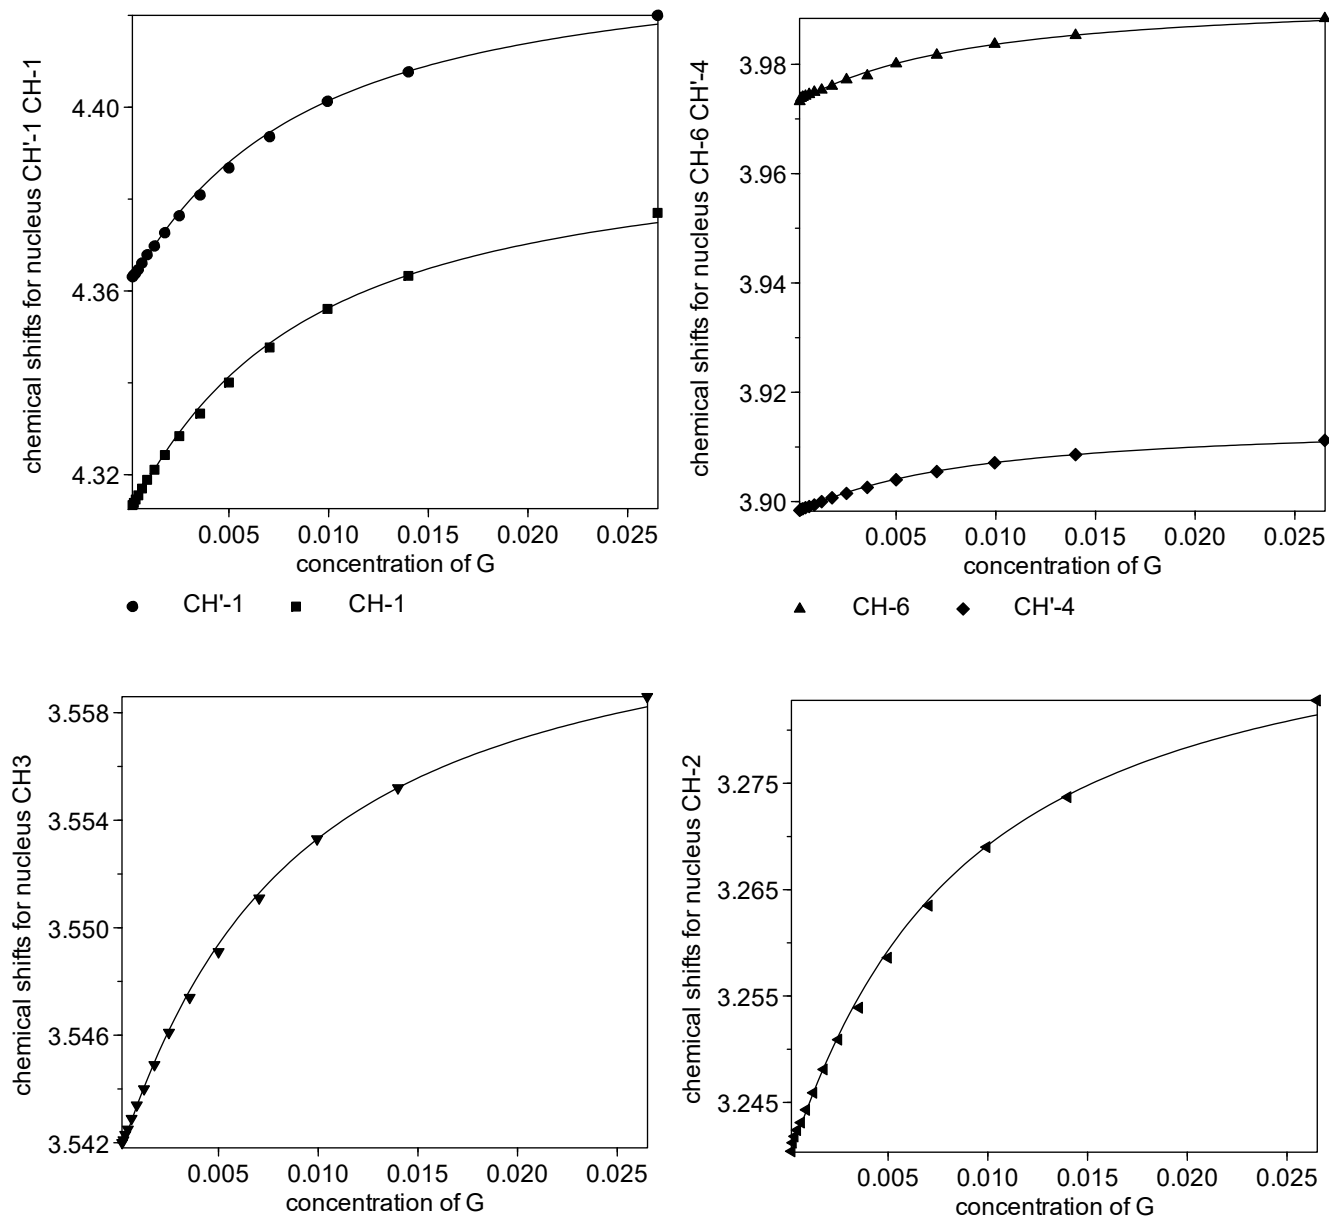

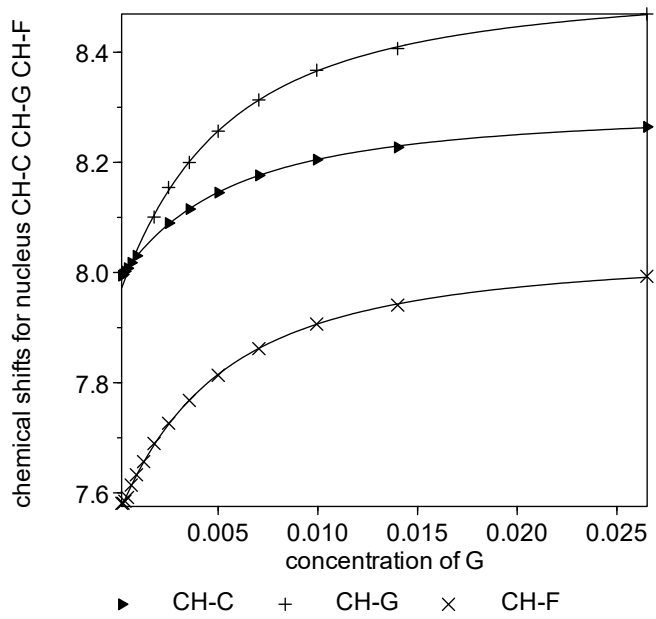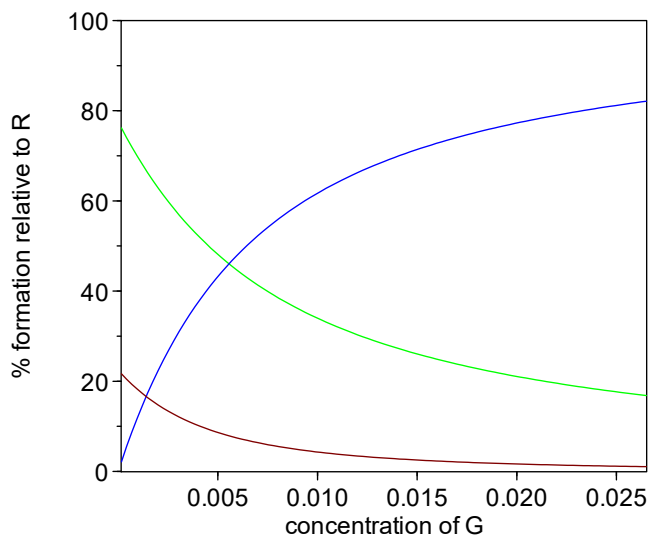

**R**    **GR**    **R<sub>2</sub>**

**1 + Me $\beta$ GlcNAc<sub>2</sub> (D<sub>2</sub>O, pD 7.4, 298 K, 500 MHz).**

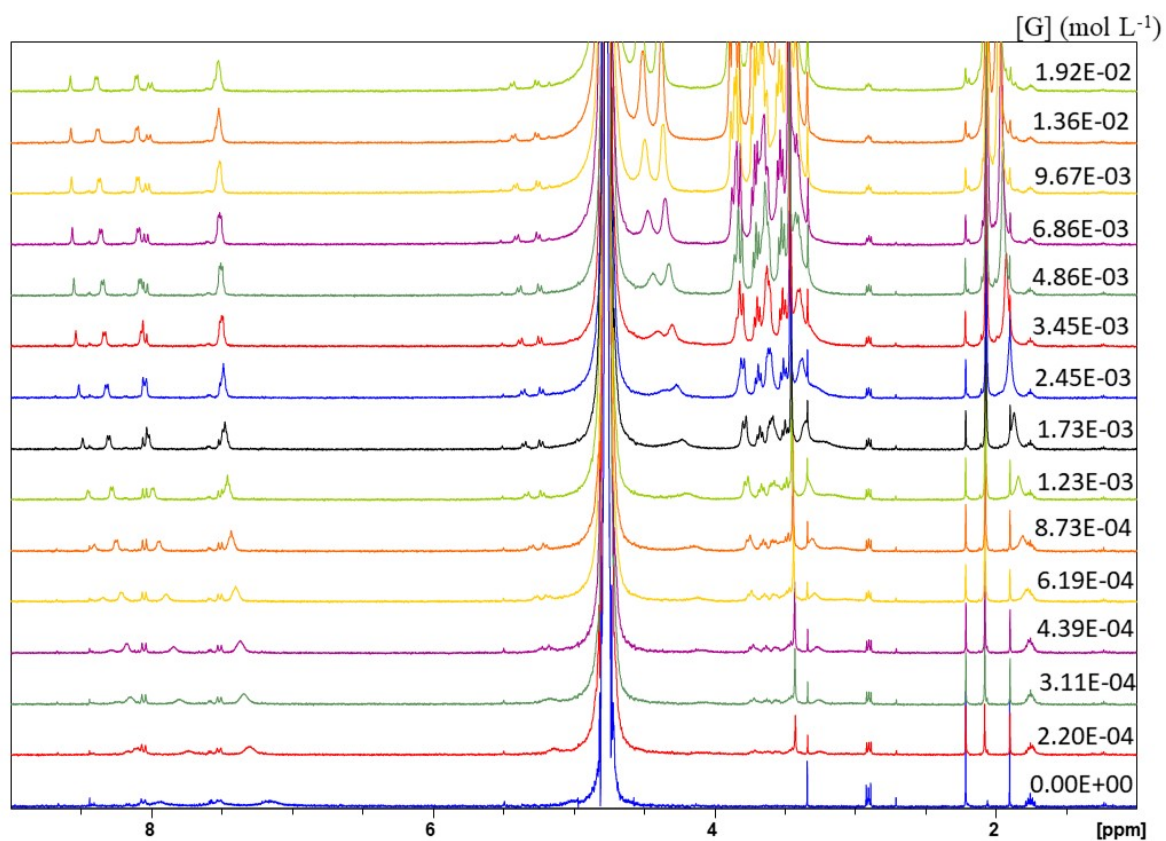

**Figure S12.** <sup>1</sup>H NMR spectroscopic titration (500 MHz, D<sub>2</sub>O, pD 7.4, 298 K) of receptor **1** (5.46 10<sup>-4</sup> mol L<sup>-1</sup>) with incremental concentrations of Me $\beta$ GlcNAc<sub>2</sub> (G).

### Data Table

R = 1 G = Me $\beta$ GlcNAc<sub>2</sub>

$\delta$  (ppm) vs. [G] (mol L<sup>-1</sup>)

Titration [R] = 5.46 10<sup>-4</sup> mol L<sup>-1</sup>

| [G]      | CH-1<br>G | CH-6'<br>G | CH3<br>G | Ac'<br>G | Ac<br>G | CH-C<br>R | CH-G<br>R |
|----------|-----------|------------|----------|----------|---------|-----------|-----------|
| 0.00E+00 | -         | -          | -        | -        | -       | 7.9463    | 7.5285    |
| 2.20E-04 | 4.0751    | 3.7183     | 3.4293   | 2.0829   | -       | 8.1064    | -         |
| 3.11E-04 | 4.0774    | 3.7234     | 3.4319   | 2.0821   | -       | 8.1513    | -         |
| 4.39E-04 | 4.0908    | 3.7287     | 3.4343   | 2.0812   | -       | 8.1789    | -         |
| 6.19E-04 | 4.1191    | 3.7374     | 3.4387   | 2.0799   | 1.7809  | 8.2139    | 7.8962    |
| 8.73E-04 | -         | 3.7497     | 3.4441   | 2.0781   | 1.8123  | 8.2540    | 7.9495    |
| 1.23E-03 | 4.1978    | 3.7621     | 3.4503   | 2.0760   | 1.8419  | 8.2841    | 7.9918    |
| 1.73E-03 | 4.2313    | 3.7775     | 3.4570   | 2.0737   | 1.8736  | 8.3045    | 8.0259    |
| 2.45E-03 | 4.2733    | 3.7913     | 3.4635   | 2.0715   | 1.9043  | 8.3205    | 8.0514    |
| 3.45E-03 | 4.3004    | 3.8017     | 3.4688   | 2.0698   | 1.9284  | 8.3343    | 8.0706    |
| 4.86E-03 | 4.3302    | 3.8107     | 3.4731   | 2.0684   | 1.9493  | 8.3481    | 8.0840    |
| 6.86E-03 | 4.3504    | 3.8186     | 3.4767   | 2.0672   | 1.9660  | 8.3613    | 8.0938    |
| 9.67E-03 | 4.3684    | 3.8236     | 3.4796   | 2.0662   | 1.9787  | 8.3734    | 8.0996    |
| 1.36E-02 | 4.3819    | 3.8286     | 3.4815   | 2.0652   | 1.9894  | 8.3832    | 8.1042    |
| 1.92E-02 | 4.3919    | 3.8322     | 3.4831   | 2.0644   | 1.9971  | 8.3928    | 8.1078    |

## Results page

no. of spectra            15  
 no. of resonance values   93  
 no. of resonant nuclei    7

sigma =    0.00208276193                      RMS weighted residual =    0.00178095364

|      | stoich | coeff | value    | relative    | log    | standard  |        |         |
|------|--------|-------|----------|-------------|--------|-----------|--------|---------|
|      |        |       |          | std devn    | beta   | deviation |        |         |
| Beta | 1      | 1     | refined  | 3.5677E+003 | 0.0963 | 3.5524    | 0.0418 | ( GR )  |
| Beta | 1      | 2     | refined  | 2.2306E+007 | 0.2059 | 7.3484    | 0.0894 | ( GR2 ) |
| Beta | 0      | 2     | constant | 4.4208E+002 |        | 2.6455    |        | ( R2 )  |

### Individual chemical shifts

| G     |   |        |        | R      |        |
|-------|---|--------|--------|--------|--------|
|       | + | value  | error  | value  | error  |
| CH-1  | + | 4.4214 | 0.0026 |        |        |
| CH-6' | + | 3.8422 | 0.0015 |        |        |
| CH3   | + | 3.4880 | 0.0014 |        |        |
| Ac'   | + | 2.0631 | 0.0013 |        |        |
| Ac    | + | 2.0194 | 0.0022 |        |        |
| CH-C  | + |        |        | 7.9737 | 0.0781 |
| CH-G  | + |        |        | 6.7497 | 0.1138 |
|       | + |        |        |        |        |

| 1,1   |   |        |        | 1,2    |        |
|-------|---|--------|--------|--------|--------|
|       | + | value  | error  | value  | error  |
| CH-1  | + | 3.3006 | 0.0740 | 4.3181 | 0.0164 |
| CH-6' | + | 3.4590 | 0.0280 | 3.7986 | 0.0104 |
| CH3   | + | 3.3064 | 0.0171 | 3.4678 | 0.0099 |
| Ac'   | + | 2.1262 | 0.0130 | 2.0686 | 0.0098 |
| Ac    | + | 1.1726 | 0.0543 | 1.8893 | 0.0340 |
| CH-C  | + | 8.4080 | 0.0029 | 8.2519 | 0.0267 |
| CH-G  | + | 8.1160 | 0.0023 | 8.2420 | 0.0203 |
|       | + |        |        |        |        |

| 0,2   |   |        |        |
|-------|---|--------|--------|
|       | + | value  | error  |
| CH-1  | + |        |        |
| CH-6' | + |        |        |
| CH3   | + |        |        |
| Ac'   | + |        |        |
| Ac    | + |        |        |
| CH-C  | + | 7.8710 | 0.2208 |
| CH-G  | + | 9.7161 | 0.3201 |
|       | + |        |        |

### Correlation coefficients\*1000

|   | 1   | 2 |
|---|-----|---|
| 1 |     |   |
| 2 | 399 |   |

Parameters are numbered as follows

1 beta 1,1  
 2 beta 1,2

### Titration Plots

Chemical shifts ( $\delta$ , ppm) vs. concentration of G ( $\text{mol L}^{-1}$ )

experimental (symbols) and calculated (lines) values

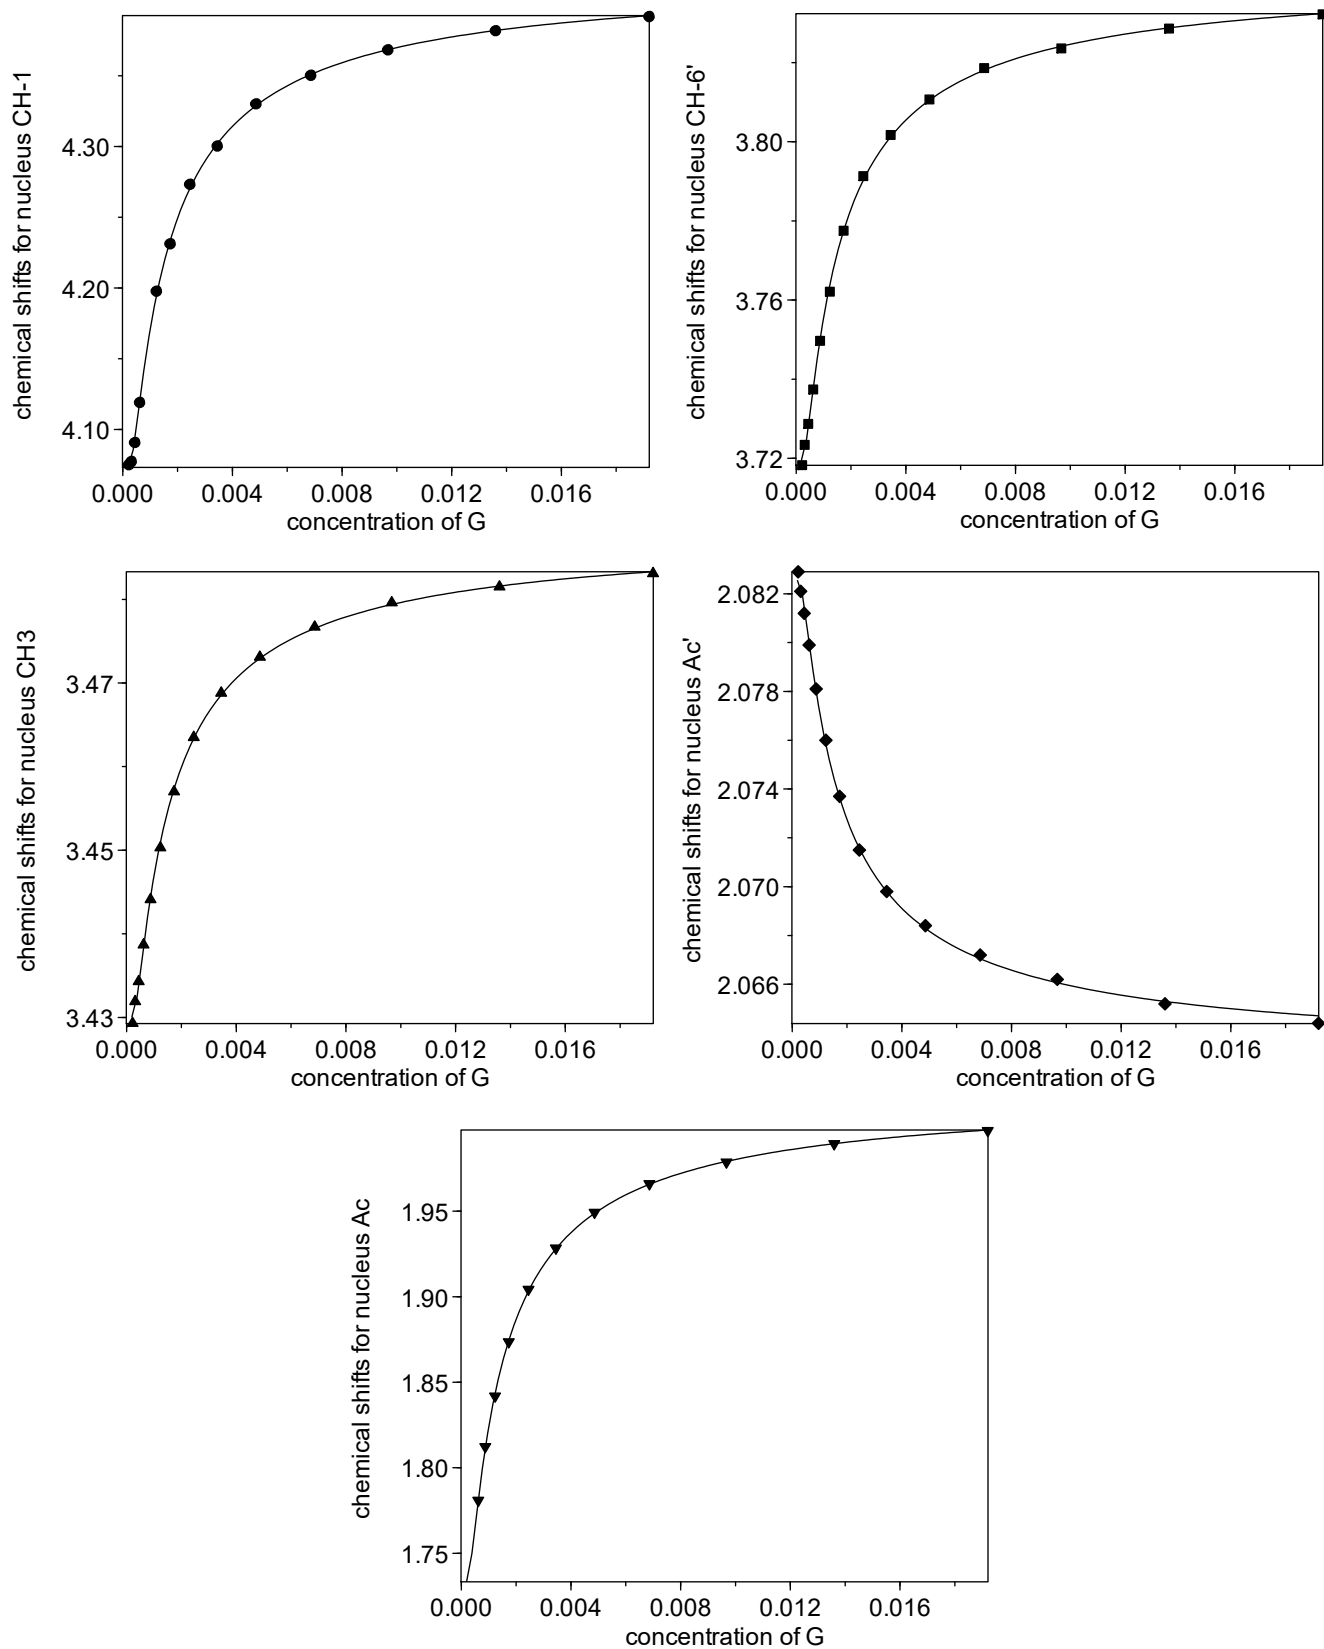

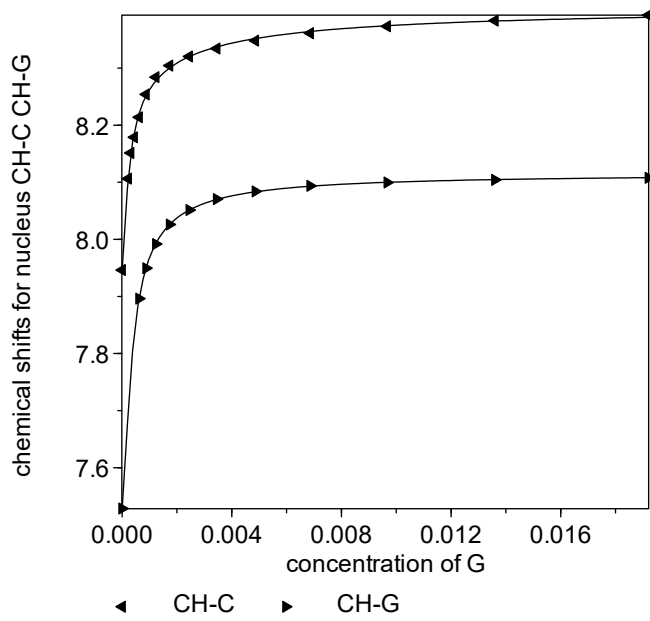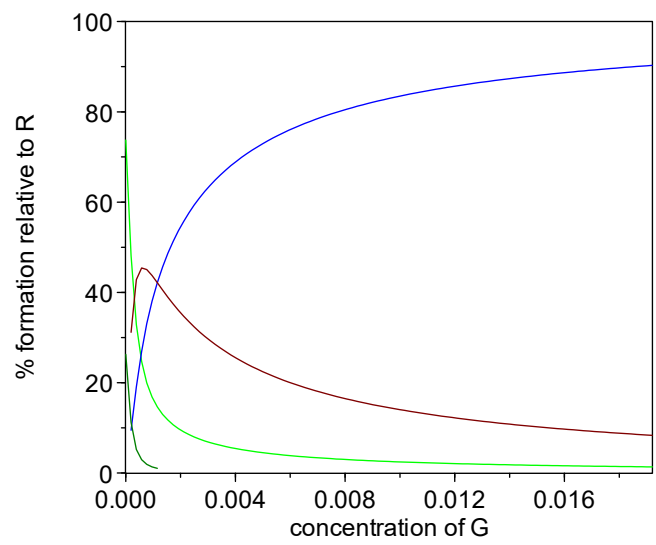

**R**    **GR**    **GR<sub>2</sub>**    **R<sub>2</sub>**



**1 + Me $\beta$ GlcNAc (D<sub>2</sub>O, pD 7.4, 298 K, 500 MHz).**

R = 1 G = Me $\beta$ GlcNAc

**Titration**

[R] =  $4.97 \cdot 10^{-4}$  mol L<sup>-1</sup>

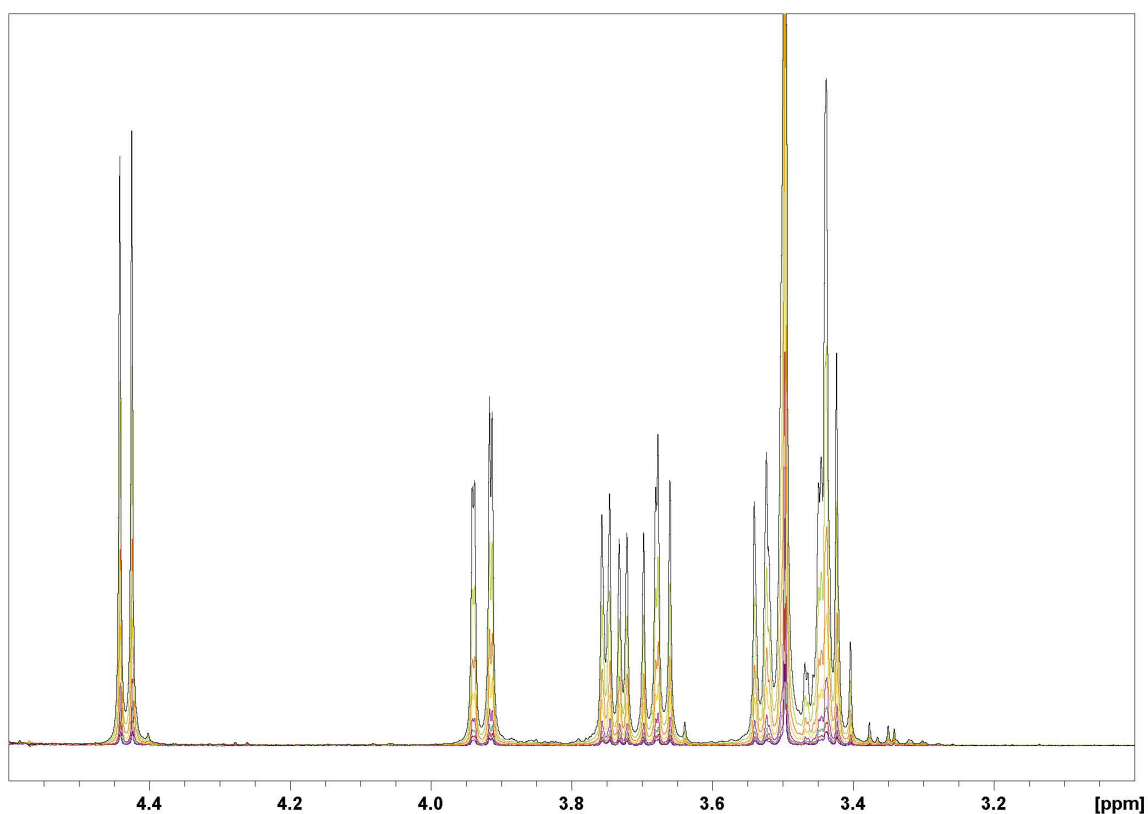

**Figure S13.** Superposition of <sup>1</sup>H NMR spectra registered at incremental concentrations of Me $\beta$ GlcNAc (0.329 mM, 0.623 mM, 1.18 mM, 2.23 mM, 4.21 mM, 7.57 mM, 15.1 mM, 28.5 mM) in a 0.497 mM solution of **1**. Expansion of the saccharide region.

**Table S1.** Cumulative formation constants ( $\log \beta_n$ )<sup>[a]</sup> and intrinsic median binding concentration ( $BC_{50}^0$ , mM)<sup>[b]</sup> for receptor **1** to Me $\beta$ CeB (R:G) complexes, measured at 298 K from NMR data in D<sub>2</sub>O at pD 11.<sup>[c]</sup>

| R:G | $\log \beta_n$ | $BC_{50}^0$ |
|-----|----------------|-------------|
| 1:1 | 2.50±0.08      | 1.39±0.29   |
| 2:1 | 6.46±0.10      |             |

[a] Formation constants were obtained by nonlinear least-square regression analysis of NMR data.

[b] Calculated from the  $\log \beta$  values using the “BC50 Calculator” program.<sup>[15]</sup> [c] Receptor dimerization constant at pD 11 (**1**:  $\log \beta_{\text{dim}} = 3.17 \pm 0.07$ ) was set invariant in the nonlinear regression analysis of NMR data.

**Calorimetric titrations and data analysis.** Isothermal Titration Microcalorimetry experiments were performed at 298 K with a Nano-ITC instrument. After an initial injection of 3  $\mu\text{L}$ , which was excluded from data analysis, aliquots of the titrant solution, containing the glycoside, were injected stepwise into the sample cell containing a solution of the titrate **1**. Titrant solutions containing **1** were prepared in  $\text{H}_2\text{O}$  adjusting the pH with a diluted NaOH solution. All experiments were performed in  $\text{H}_2\text{O}$  at pH 7.4. Heats of dilution were measured by injecting the titrant solution into neat  $\text{H}_2\text{O}$  and then subtracted from the binding heats. To remove ambiguities in the definition of binding models of receptor **1**, data from independent titrations performed at different concentrations of the titrate were simultaneously fitted to measure the cumulative association constants and the thermodynamic parameters using the HypCal software package.<sup>S3</sup> The dimerization constant  $\log \beta_{\text{dim}} 2.65 \pm 0.07$  of receptor **1** was set invariant in the non linear regression analysis of receptor-glycosides binding data.

## 1 + Me $\beta$ CeB (H<sub>2</sub>O, pH 7.4, 298 K).

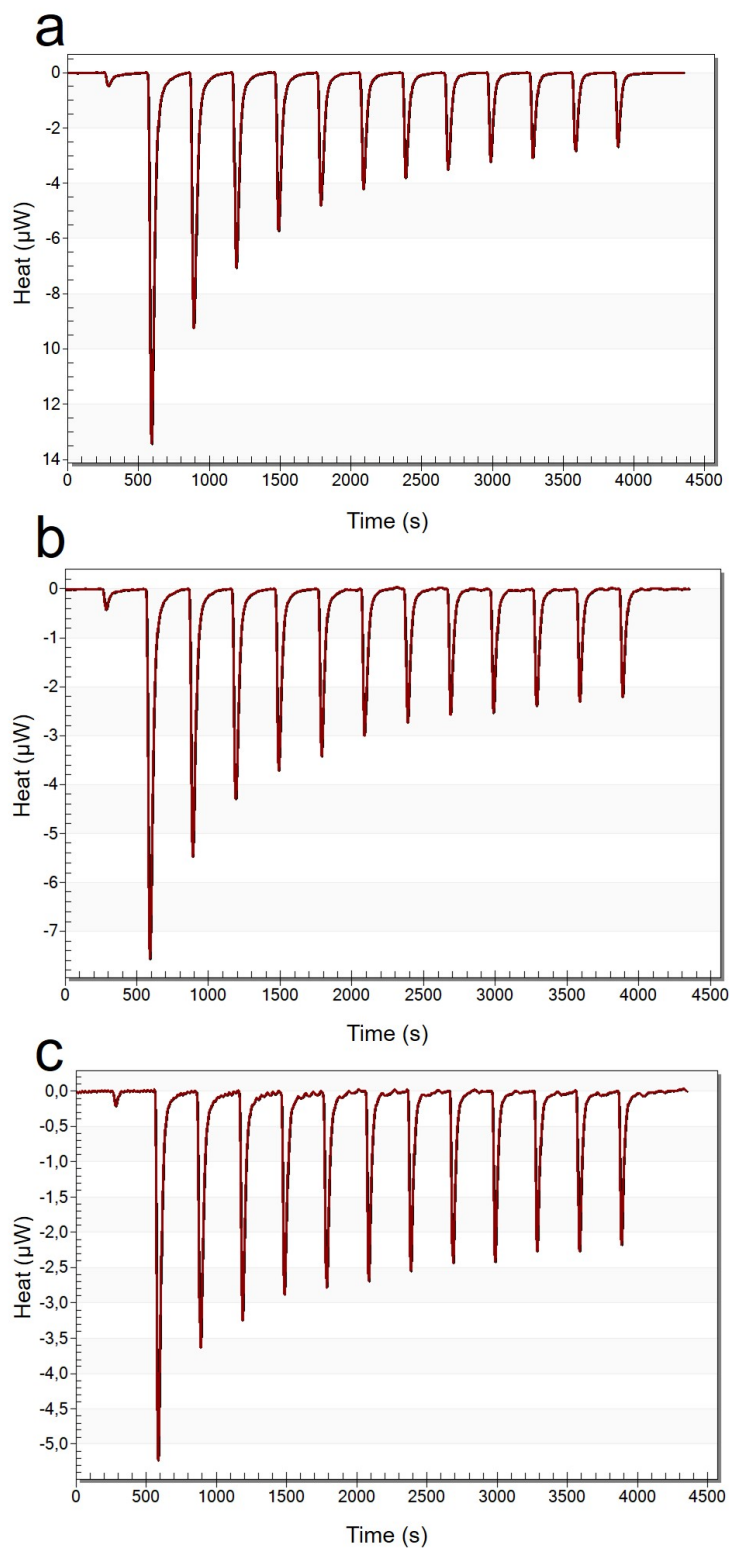

**Figure S14.** ITC results of Me $\beta$ CeB with 1 in H<sub>2</sub>O, pH 7.4, at 298 K: a) Titration of 1 ( $1.25 \times 10^{-4} \text{ mol L}^{-1}$ ) with Me $\beta$ CeB ( $4.04 \times 10^{-2} \text{ mol L}^{-1}$ ); b) Titration of 1 ( $6.25 \times 10^{-5} \text{ mol L}^{-1}$ ) with Me $\beta$ CeB ( $4.04 \times 10^{-2} \text{ mol L}^{-1}$ ); c) Titration of 1 ( $3.13 \times 10^{-5} \text{ mol L}^{-1}$ ) with Me $\beta$ CeB ( $4.04 \times 10^{-2} \text{ mol L}^{-1}$ ).

### Data Table

$$R = 1 \quad G = \text{Me}\beta\text{CeB}$$

$$[G] = 4.04 \cdot 10^{-2} \text{ mol L}^{-1}$$

#### Titration 1: $[R] = 1.25 \cdot 10^{-4} \text{ mol L}^{-1}$

| Injection | Q<br>( $\mu\text{J}$ ) | Corrected Q<br>( $\mu\text{J}$ ) | inj volume<br>( $\mu\text{L}$ ) | mol G<br>(mol) | mol R<br>(mol) | mol G / mol R | total volume<br>( $\mu\text{L}$ ) |
|-----------|------------------------|----------------------------------|---------------------------------|----------------|----------------|---------------|-----------------------------------|
| 1         | -30.9766               | -27.6163                         | 3                               | 1.21E-07       | 1.18E-07       | 1.029299      | 945                               |
| 2         | -582.334               | -489.594                         | 20                              | 9.27E-07       | 1.15E-07       | 8.039663      | 945                               |
| 3         | -400.243               | -314.737                         | 20                              | 1.72E-06       | 1.13E-07       | 15.2016       | 945                               |
| 4         | -299.109               | -218.062                         | 20                              | 2.49E-06       | 1.10E-07       | 22.51839      | 945                               |
| 5         | -241.943               | -162.067                         | 20                              | 3.24E-06       | 1.08E-07       | 29.99338      | 945                               |
| 6         | -199.557               | -125.591                         | 20                              | 3.98E-06       | 1.06E-07       | 37.63         | 945                               |
| 7         | -171.782               | -99.1094                         | 20                              | 4.71E-06       | 1.04E-07       | 45.43173      | 945                               |
| 8         | -153.049               | -78.1583                         | 20                              | 5.41E-06       | 1.01E-07       | 53.40214      | 945                               |
| 9         | -135.395               | -65.943                          | 20                              | 6.11E-06       | 9.92E-08       | 61.54489      | 945                               |
| 10        | -122.045               | -50.2804                         | 20                              | 6.79E-06       | 9.71E-08       | 69.8637       | 945                               |
| 11        | -114.121               | -45.7163                         | 20                              | 7.45E-06       | 9.51E-08       | 78.36238      | 945                               |
| 12        | -103.462               | -35.4923                         | 20                              | 8.10E-06       | 9.31E-08       | 87.04481      | 945                               |
| 13        | -101.806               | -36.1191                         | 20                              | 8.74E-06       | 9.11E-08       | 95.91496      | 945                               |

#### Titration 2: $[R] = 6.25 \cdot 10^{-5} \text{ mol L}^{-1}$

| Injection | Q<br>( $\mu\text{J}$ ) | Corrected Q<br>( $\mu\text{J}$ ) | inj volume<br>( $\mu\text{L}$ ) | mol G<br>(mol) | mol R<br>(mol) | mol G / mol R | total volume<br>( $\mu\text{L}$ ) |
|-----------|------------------------|----------------------------------|---------------------------------|----------------|----------------|---------------|-----------------------------------|
| 1         | -21.4848               | -18.1244                         | 3                               | 1.21E-07       | 5.89E-08       | 2.058599      | 945                               |
| 2         | -328.267               | -235.527                         | 20                              | 9.27E-07       | 5.76E-08       | 16.07933      | 945                               |
| 3         | -231.113               | -145.607                         | 20                              | 1.72E-06       | 5.64E-08       | 30.4032       | 945                               |
| 4         | -180.018               | -98.9708                         | 20                              | 2.49E-06       | 5.52E-08       | 45.03679      | 945                               |
| 5         | -151.376               | -71.4999                         | 20                              | 3.24E-06       | 5.40E-08       | 59.98677      | 945                               |
| 6         | -135.309               | -61.343                          | 20                              | 3.98E-06       | 5.29E-08       | 75.26         | 945                               |
| 7         | -112.061               | -39.3888                         | 20                              | 4.71E-06       | 5.18E-08       | 90.86346      | 945                               |
| 8         | -100.561               | -25.6711                         | 20                              | 5.41E-06       | 5.07E-08       | 106.8043      | 945                               |
| 9         | -92.6911               | -23.2389                         | 20                              | 6.11E-06       | 4.96E-08       | 123.0898      | 945                               |
| 10        | -94.6884               | -22.9239                         | 20                              | 6.79E-06       | 4.86E-08       | 139.7274      | 945                               |
| 11        | -86.4853               | -18.0804                         | 20                              | 7.45E-06       | 4.75E-08       | 156.7248      | 945                               |
| 12        | -80.3039               | -12.3341                         | 20                              | 8.10E-06       | 4.65E-08       | 174.0896      | 945                               |
| 13        | -76.5588               | -10.8719                         | 20                              | 8.74E-06       | 4.55E-08       | 191.8299      | 945                               |

**Titration 3:**  $[R] = 3.13 \cdot 10^{-5} \text{ mol L}^{-1}$ 

| Injection | Q<br>( $\mu\text{J}$ ) | Corrected Q<br>( $\mu\text{J}$ ) | inj volume<br>( $\mu\text{L}$ ) | mol G<br>(mol) | mol R<br>(mol) | mol G / mol R | total volume<br>( $\mu\text{L}$ ) |
|-----------|------------------------|----------------------------------|---------------------------------|----------------|----------------|---------------|-----------------------------------|
| 1         | -5.956317667           | -2.596000333                     | 3                               | 1.21E-07       | 2.94E-08       | 4.123795525   | 945                               |
| 2         | -201.274375            | -108.534725                      | 20                              | 9.27E-07       | 2.88E-08       | 32.21018667   | 945                               |
| 3         | -152.692475            | -67.186525                       | 20                              | 1.72E-06       | 2.82E-08       | 60.90385113   | 945                               |
| 4         | -131.606875            | -50.559875                       | 20                              | 2.49E-06       | 2.76E-08       | 90.21791916   | 945                               |
| 5         | -114.939075            | -35.062675                       | 20                              | 3.24E-06       | 2.70E-08       | 120.1658049   | 945                               |
| 6         | -103.531325            | -29.565625                       | 20                              | 3.98E-06       | 2.64E-08       | 150.7612124   | 945                               |
| 7         | -94.42565              | -21.752975                       | 20                              | 4.71E-06       | 2.59E-08       | 182.0181423   | 945                               |
| 8         | -89.067975             | -14.1778                         | 20                              | 5.41E-06       | 2.53E-08       | 213.9508977   | 945                               |
| 9         | -81.4659               | -12.013775                       | 20                              | 6.11E-06       | 2.48E-08       | 246.5740911   | 945                               |
| 10        | -83.05675              | -11.292275                       | 20                              | 6.79E-06       | 2.42E-08       | 279.9026508   | 945                               |
| 11        | -81.4706               | -13.0657                         | 20                              | 7.45E-06       | 2.37E-08       | 313.951828    | 945                               |
| 12        | -80.8955               | -12.925675                       | 20                              | 8.10E-06       | 2.32E-08       | 348.7372036   | 945                               |
| 13        | -77.3666               | -11.6797                         | 20                              | 8.74E-06       | 2.27E-08       | 384.2746955   | 945                               |

## Results page

```

Reagent Reagent
number  name
  1      R
  2      G
  
```

sigma = 0.00363

| Formation constants | Value      | relative<br>std devn | log<br>beta | standard<br>deviation |   |   |
|---------------------|------------|----------------------|-------------|-----------------------|---|---|
| Beta A refined      | 0.3790E+03 | 0.0722               | 2.5787      | 0.0314                | 1 | 1 |
| Beta B refined      | 0.1899E+06 | 0.6580               | 5.2786      | 0.2857                | 2 | 1 |
| Beta C constant     | 0.4421E+03 |                      | 2.6455      | 0.0676                | 2 | 0 |

| Formation entalpies | Value     | standard<br>deviation |
|---------------------|-----------|-----------------------|
| -DeltaH A refined   | 15.5995   | 0.6640                |
| -DeltaH B refined   | -109.3421 | 46.6052               |
| -DeltaH C refined   | -108.9897 | 20.9161               |

++++  
 Thermodynamic Functions, kJ/mol

|   | - DeltaG° |        | - DeltaH° |         | T DeltaS° |         |
|---|-----------|--------|-----------|---------|-----------|---------|
| A | 14.7191   | 0.1790 | 15.5995   | 0.6640  | -0.8803   | 0.8176  |
| B | 30.1304   | 1.6311 | -109.3421 | 46.6052 | 139.4725  | 47.5953 |
| C | 15.1006   | 0.1055 | -108.9897 | 20.9161 | 124.0903  | 20.9163 |

++++

Correlation coefficients\*1000                      Run timed at 14.31 on 4 Sep 2020

```

 2  588
 3 -823 -432
 4  260 -596 -380
 5  812  711 -910  69
   1    2    3    4
  
```

Order of parameters:

```

 1      Beta  A
 2      Beta  B
 3     -DeltaH A
 4     -DeltaH B
 5     -DeltaH C
  
```

### Results table

| Addition<br>( $\mu$ L) | Qobs<br>(mJ) | Qcalc<br>(mJ) | residual<br>(mJ) | QTobs<br>(mJ) | QTcalc<br>(mJ) |
|------------------------|--------------|---------------|------------------|---------------|----------------|
| 1.1300                 | -0.0276      |               |                  |               |                |
| 21.1300                | -0.4896      | -0.4898       | 2.0000e-4        | -0.5172       | -0.5174        |
| 41.1300                | -0.3147      | -0.3163       | 1.6000e-3        | -0.8319       | -0.8337        |
| 61.1300                | -0.2181      | -0.2200       | 1.9000e-3        | -1.0500       | -1.0537        |
| 81.1300                | -0.1621      | -0.1613       | -8.0000e-4       | -1.2121       | -1.2150        |
| 101.1300               | -0.1256      | -0.1230       | -2.6000e-3       | -1.3377       | -1.3380        |
| 121.1300               | -0.0991      | -0.0967       | -2.4000e-3       | -1.4368       | -1.4347        |
| 141.1300               | -0.0782      | -0.0779       | -3.0000e-4       | -1.5149       | -1.5126        |
| 161.1300               | -0.0659      | -0.0640       | -2.0000e-3       | -1.5809       | -1.5765        |
| 181.1300               | -0.0503      | -0.0534       | 3.1000e-3        | -1.6312       | -1.6300        |
| 201.1300               | -0.0457      | -0.0452       | -5.0000e-4       | -1.6769       | -1.6752        |
| 221.1300               | -0.0355      | -0.0387       | 3.2000e-3        | -1.7124       | -1.7139        |
| 241.1300               | -0.0361      | -0.0335       | -2.6000e-3       | -1.7485       | -1.7474        |
| 1.5400                 | -0.0181      |               |                  |               |                |
| 21.5400                | -0.2355      | -0.2308       | -4.8000e-3       | -0.2537       | -0.2489        |
| 41.5400                | -0.1456      | -0.1447       | -9.0000e-4       | -0.3993       | -0.3936        |
| 61.5400                | -0.0990      | -0.0989       | -1.0000e-4       | -0.4982       | -0.4925        |
| 81.5400                | -0.0715      | -0.0717       | 2.0000e-4        | -0.5697       | -0.5642        |
| 101.5400               | -0.0613      | -0.0543       | -7.0000e-3       | -0.6311       | -0.6185        |
| 121.5400               | -0.0394      | -0.0425       | 3.1000e-3        | -0.6705       | -0.6610        |
| 141.5400               | -0.0257      | -0.0341       | 8.4000e-3        | -0.6961       | -0.6951        |
| 161.5400               | -0.0232      | -0.0280       | 4.7000e-3        | -0.7194       | -0.7231        |
| 181.5400               | -0.0229      | -0.0233       | 4.0000e-4        | -0.7423       | -0.7464        |
| 201.5400               | -0.0181      | -0.0197       | 1.6000e-3        | -0.7604       | -0.7661        |
| 221.5400               | -0.0123      | -0.0169       | 4.5000e-3        | -0.7727       | -0.7830        |
| 241.5400               | -0.0109      | -0.0146       | 3.7000e-3        | -0.7836       | -0.7976        |
| 0.4800                 | -2.6000e-3   |               |                  |               |                |
| 20.4800                | -0.1085      | -0.1146       | 6.0000e-3        | -0.1111       | -0.1172        |
| 40.4800                | -0.0672      | -0.0702       | 3.0000e-3        | -0.1783       | -0.1874        |
| 60.4800                | -0.0506      | -0.0473       | -3.2000e-3       | -0.2289       | -0.2347        |
| 80.4800                | -0.0351      | -0.0340       | -1.0000e-3       | -0.2639       | -0.2687        |
| 100.4800               | -0.0296      | -0.0256       | -4.0000e-3       | -0.2935       | -0.2943        |
| 120.4800               | -0.0218      | -0.0200       | -1.8000e-3       | -0.3153       | -0.3143        |
| 140.4800               | -0.0142      | -0.0160       | 1.8000e-3        | -0.3294       | -0.3302        |
| 160.4800               | -0.0120      | -0.0131       | 1.1000e-3        | -0.3414       | -0.3433        |
| 180.4800               | -0.0113      | -0.0109       | -4.0000e-4       | -0.3527       | -0.3542        |
| 200.4800               | -0.0131      | -9.2000e-3    | -3.9000e-3       | -0.3658       | -0.3634        |
| 220.4800               | -0.0129      | -7.9000e-3    | -5.1000e-3       | -0.3787       | -0.3713        |
| 240.4800               | -0.0117      | -6.8000e-3    | -4.9000e-3       | -0.3904       | -0.3781        |



### Titration Plots

Experimental (symbols) and calculated (cross and lines) heats

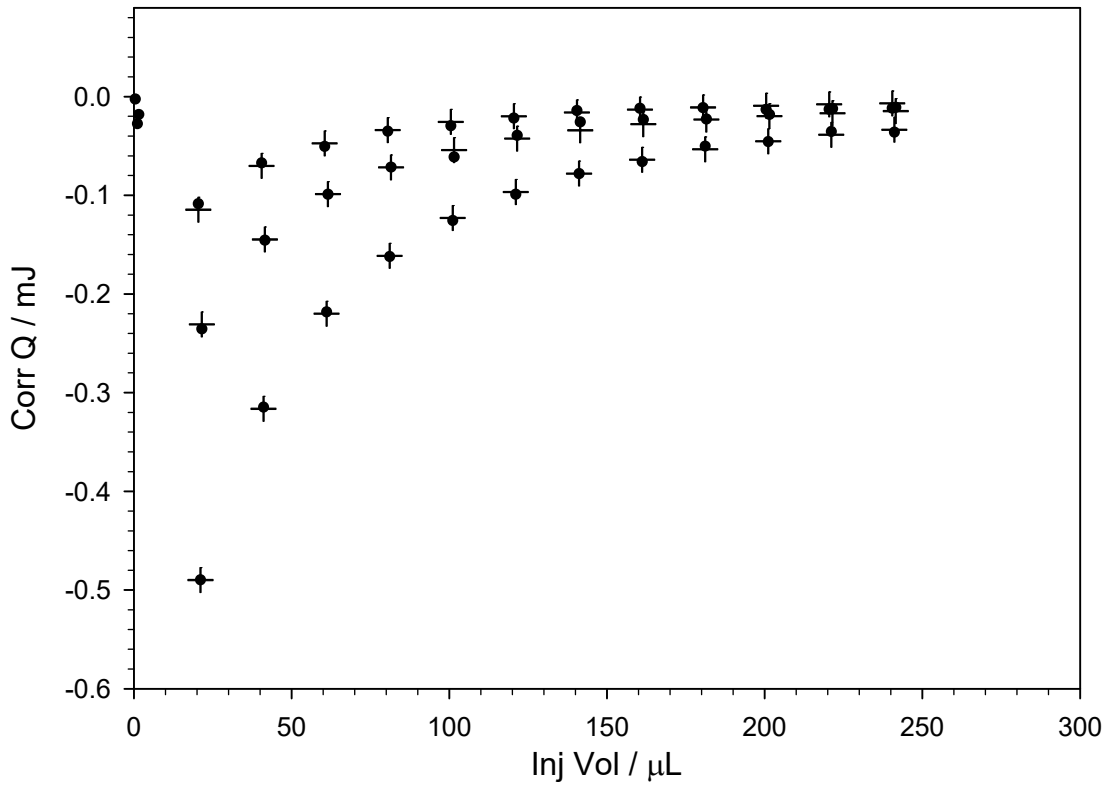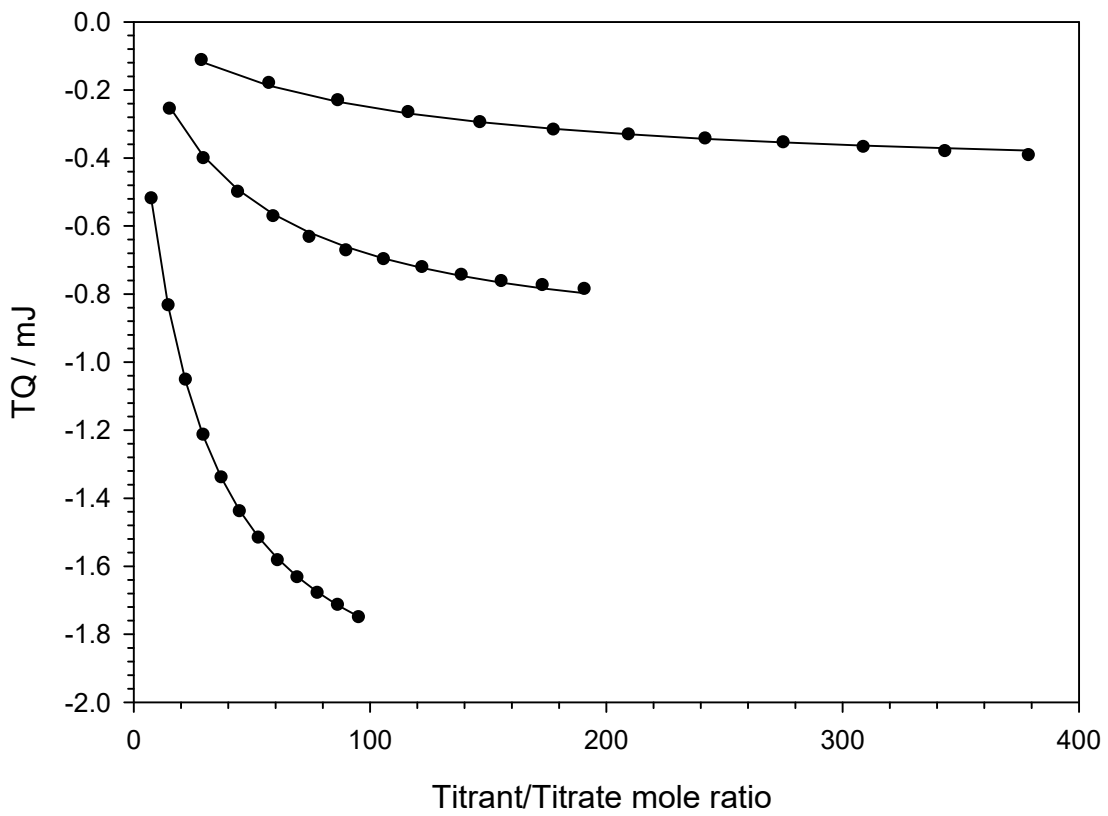

## 1 + Me $\beta$ Mal (H<sub>2</sub>O, pH 7.4, 298 K).

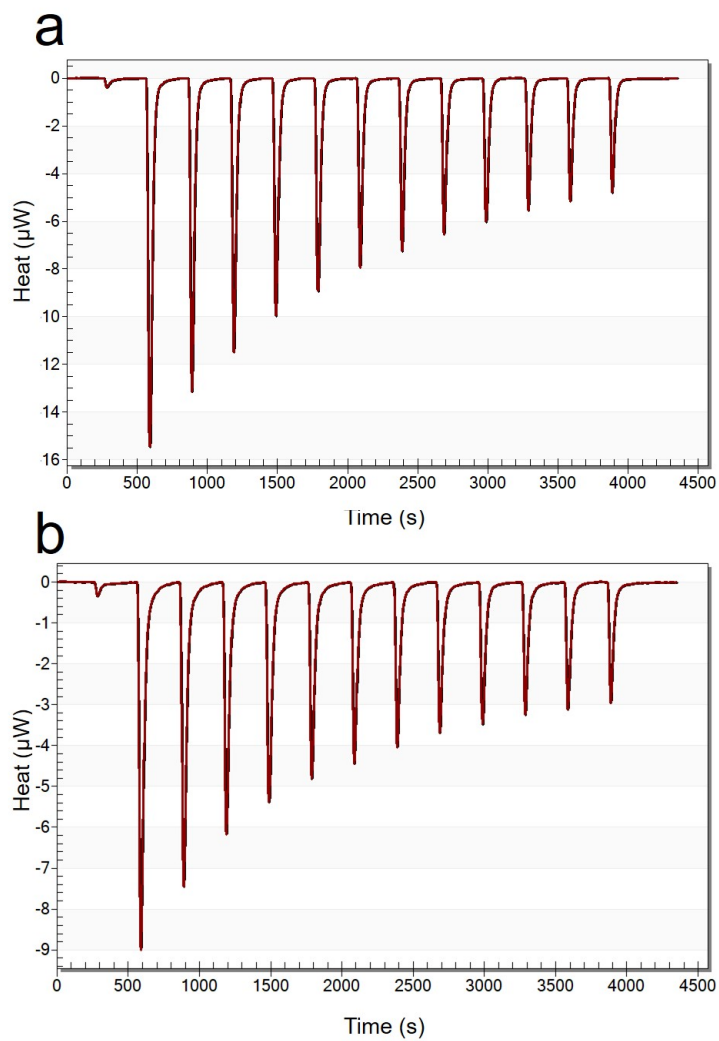

**Figure S15.** ITC results of Me $\beta$ Mal with **1** in H<sub>2</sub>O, pH 7.4, at 298 K: a) Titration of **1** ( $2.50 \cdot 10^{-4} \text{ mol L}^{-1}$ ) with Me $\beta$ Mal ( $4.04 \cdot 10^{-2} \text{ mol L}^{-1}$ ); b) Titration of **1** ( $1.25 \cdot 10^{-4} \text{ mol L}^{-1}$ ) with Me $\beta$ Mal ( $4.04 \cdot 10^{-2} \text{ mol L}^{-1}$ )

### Data Table

$$R = 1 \quad G = \text{Me}\beta\text{Mal}$$

$$[G] = 4.04 \cdot 10^{-2} \text{ mol L}^{-1}$$

#### Titration 1: $[R] = 2.50 \cdot 10^{-4} \text{ mol L}^{-1}$

| Injection | Q<br>( $\mu\text{J}$ ) | Corrected Q<br>( $\mu\text{J}$ ) | inj volume<br>( $\mu\text{L}$ ) | mol G<br>(mol) | mol R<br>(mol) | mol G / mol R | total volume<br>( $\mu\text{L}$ ) |
|-----------|------------------------|----------------------------------|---------------------------------|----------------|----------------|---------------|-----------------------------------|
| 1         | -21.102                | -11.5977                         | 3                               | 1.21E-07       | 2.36E-07       | 0.51465       | 945                               |
| 2         | -550.989               | -443.994                         | 20                              | 9.27E-07       | 2.31E-07       | 4.019831      | 945                               |
| 3         | -470.059               | -372.192                         | 20                              | 1.72E-06       | 2.26E-07       | 7.600801      | 945                               |
| 4         | -403.38                | -308.473                         | 20                              | 2.49E-06       | 2.21E-07       | 11.2592       | 945                               |
| 5         | -349.554               | -258.811                         | 20                              | 3.24E-06       | 2.16E-07       | 14.99669      | 945                               |
| 6         | -309.931               | -223.443                         | 20                              | 3.98E-06       | 2.12E-07       | 18.815        | 945                               |
| 7         | -276.198               | -192.986                         | 20                              | 4.71E-06       | 2.07E-07       | 22.71586      | 945                               |
| 8         | -250.262               | -174.693                         | 20                              | 5.41E-06       | 2.03E-07       | 26.70107      | 945                               |
| 9         | -225.74                | -143.412                         | 20                              | 6.11E-06       | 1.98E-07       | 30.77245      | 945                               |
| 10        | -199.48                | -122.548                         | 20                              | 6.79E-06       | 1.94E-07       | 34.93185      | 945                               |
| 11        | -188.203               | -113.932                         | 20                              | 7.45E-06       | 1.90E-07       | 39.18119      | 945                               |
| 12        | -172.74                | -99.8081                         | 20                              | 8.10E-06       | 1.86E-07       | 43.5224       | 945                               |
| 13        | -164.805               | -85.9617                         | 20                              | 8.74E-06       | 1.82E-07       | 47.95748      | 945                               |

#### Titration 2: $[R] = 1.25 \cdot 10^{-4} \text{ mol L}^{-1}$

| Injection | Q<br>( $\mu\text{J}$ ) | Corrected Q<br>( $\mu\text{J}$ ) | inj volume<br>( $\mu\text{L}$ ) | mol G<br>(mol) | mol R<br>(mol) | mol G / mol R | total volume<br>( $\mu\text{L}$ ) |
|-----------|------------------------|----------------------------------|---------------------------------|----------------|----------------|---------------|-----------------------------------|
| 1         | -18.383                | -8.87876                         | 3                               | 1.21E-07       | 1.18E-07       | 1.029299      | 945                               |
| 2         | -371.732               | -264.736                         | 20                              | 9.27E-07       | 1.15E-07       | 8.039663      | 945                               |
| 3         | -309.987               | -212.12                          | 20                              | 1.72E-06       | 1.13E-07       | 15.2016       | 945                               |
| 4         | -256.678               | -161.771                         | 20                              | 2.49E-06       | 1.10E-07       | 22.51839      | 945                               |
| 5         | -222.233               | -131.491                         | 20                              | 3.24E-06       | 1.08E-07       | 29.99338      | 945                               |
| 6         | -198.057               | -111.569                         | 20                              | 3.98E-06       | 1.06E-07       | 37.63         | 945                               |
| 7         | -179.709               | -96.4967                         | 20                              | 4.71E-06       | 1.04E-07       | 45.43173      | 945                               |
| 8         | -159.616               | -84.048                          | 20                              | 5.41E-06       | 1.01E-07       | 53.40214      | 945                               |
| 9         | -146.976               | -64.6484                         | 20                              | 6.11E-06       | 9.92E-08       | 61.54489      | 945                               |
| 10        | -130.566               | -53.6335                         | 20                              | 6.79E-06       | 9.71E-08       | 69.8637       | 945                               |
| 11        | -125.921               | -51.6502                         | 20                              | 7.45E-06       | 9.51E-08       | 78.36238      | 945                               |
| 12        | -113.831               | -40.8998                         | 20                              | 8.10E-06       | 9.31E-08       | 87.04481      | 945                               |
| 13        | -113.2                 | -34.357                          | 20                              | 8.74E-06       | 9.11E-08       | 95.91496      | 945                               |

## Results page

Reagent Reagent  
 number name  
 1 R  
 2 G

sigma = 0.00596

| Formation constants | Value      | relative<br>std devn | log<br>beta | standard<br>deviation |   |   |
|---------------------|------------|----------------------|-------------|-----------------------|---|---|
| Beta A refined      | 0.1756E+03 | 0.0309               | 2.2444      | 0.0134                | 1 | 1 |
| Beta B constant     | 0.4421E+03 |                      | 2.6455      | 0.0676                | 2 | 0 |

| Formation entalpies | Value   | standard<br>deviation |
|---------------------|---------|-----------------------|
| -DeltaH A refined   | 20.7240 | 0.4795                |
| -DeltaH B refined   | 23.7075 | 6.1583                |

++++  
 Thermodynamic Functions, kJ/mol

|   | - DeltaG° |        | - DeltaH° |        | T DeltaS° |        |
|---|-----------|--------|-----------|--------|-----------|--------|
| A | 12.8113   | 0.0766 | 20.7240   | 0.4795 | -7.9127   | 0.4721 |
| B | 15.1006   | 0.0574 | 23.7075   | 6.1583 | -8.6070   | 6.1585 |

++++

Correlation coefficients\*1000 Run timed at 13.42 on 1 Sep 2020

|   |     |     |
|---|-----|-----|
| 2 | 175 |     |
| 3 | 670 | 825 |
|   | 1   | 2   |

Order of parameters:

|   |         |   |
|---|---------|---|
| 1 | Beta    | A |
| 2 | -DeltaH | A |
| 3 | -DeltaH | B |

### Results table

| Addition<br>( $\mu$ L) | Qobs<br>(mJ) | Qcalc<br>(mJ) | residual<br>(mJ) | QTobs<br>(mJ) | QTcalc<br>(mJ) |
|------------------------|--------------|---------------|------------------|---------------|----------------|
| 0.5200                 | -0.0116      |               |                  |               |                |
| 20.5200                | -0.4440      | -0.4507       | 6.7000e-3        | -0.4556       | -0.4623        |
| 40.5200                | -0.3722      | -0.3708       | -1.4000e-3       | -0.8278       | -0.8331        |
| 60.5200                | -0.3085      | -0.3082       | -2.0000e-4       | -1.1363       | -1.1413        |
| 80.5200                | -0.2588      | -0.2590       | 2.0000e-4        | -1.3951       | -1.4003        |
| 100.5200               | -0.2234      | -0.2198       | -3.7000e-3       | -1.6185       | -1.6201        |
| 120.5200               | -0.1930      | -0.1883       | -4.7000e-3       | -1.8115       | -1.8084        |
| 140.5200               | -0.1747      | -0.1628       | -0.0119          | -1.9862       | -1.9712        |
| 160.5200               | -0.1434      | -0.1418       | -1.6000e-3       | -2.1296       | -2.1130        |
| 180.5200               | -0.1225      | -0.1245       | 2.0000e-3        | -2.2522       | -2.2375        |
| 200.5200               | -0.1139      | -0.1100       | -3.9000e-3       | -2.3661       | -2.3475        |
| 220.5200               | -0.0998      | -0.0979       | -1.9000e-3       | -2.4659       | -2.4454        |
| 240.5200               | -0.0860      | -0.0875       | 1.6000e-3        | -2.5519       | -2.5329        |
| 0.6700                 | -8.9000e-3   |               |                  |               |                |
| 20.6700                | -0.2647      | -0.2585       | -6.2000e-3       | -0.2736       | -0.2674        |
| 40.6700                | -0.2121      | -0.2059       | -6.2000e-3       | -0.4857       | -0.4733        |
| 60.6700                | -0.1618      | -0.1671       | 5.3000e-3        | -0.6475       | -0.6404        |
| 80.6700                | -0.1315      | -0.1378       | 6.3000e-3        | -0.7790       | -0.7782        |
| 100.6700               | -0.1116      | -0.1153       | 3.7000e-3        | -0.8906       | -0.8934        |
| 120.6700               | -0.0965      | -0.0977       | 1.2000e-3        | -0.9871       | -0.9911        |
| 140.6700               | -0.0840      | -0.0837       | -4.0000e-4       | -1.0711       | -1.0748        |
| 160.6700               | -0.0646      | -0.0724       | 7.8000e-3        | -1.1358       | -1.1472        |
| 180.6700               | -0.0536      | -0.0632       | 9.6000e-3        | -1.1894       | -1.2105        |
| 200.6700               | -0.0517      | -0.0557       | 4.0000e-3        | -1.2410       | -1.2662        |
| 220.6700               | -0.0409      | -0.0493       | 8.4000e-3        | -1.2819       | -1.3155        |
| 240.6700               | -0.0344      | -0.0440       | 9.6000e-3        | -1.3163       | -1.3595        |

### Titration Plots

Experimental (symbols) and calculated (cross and lines) heats

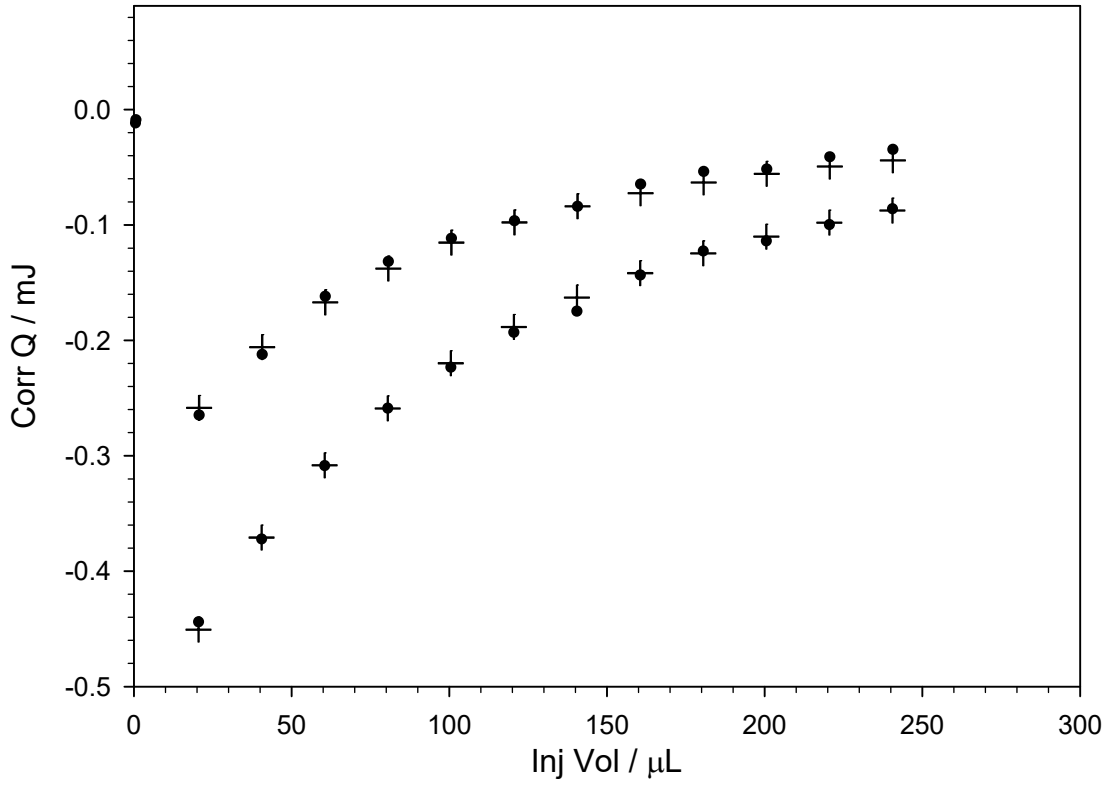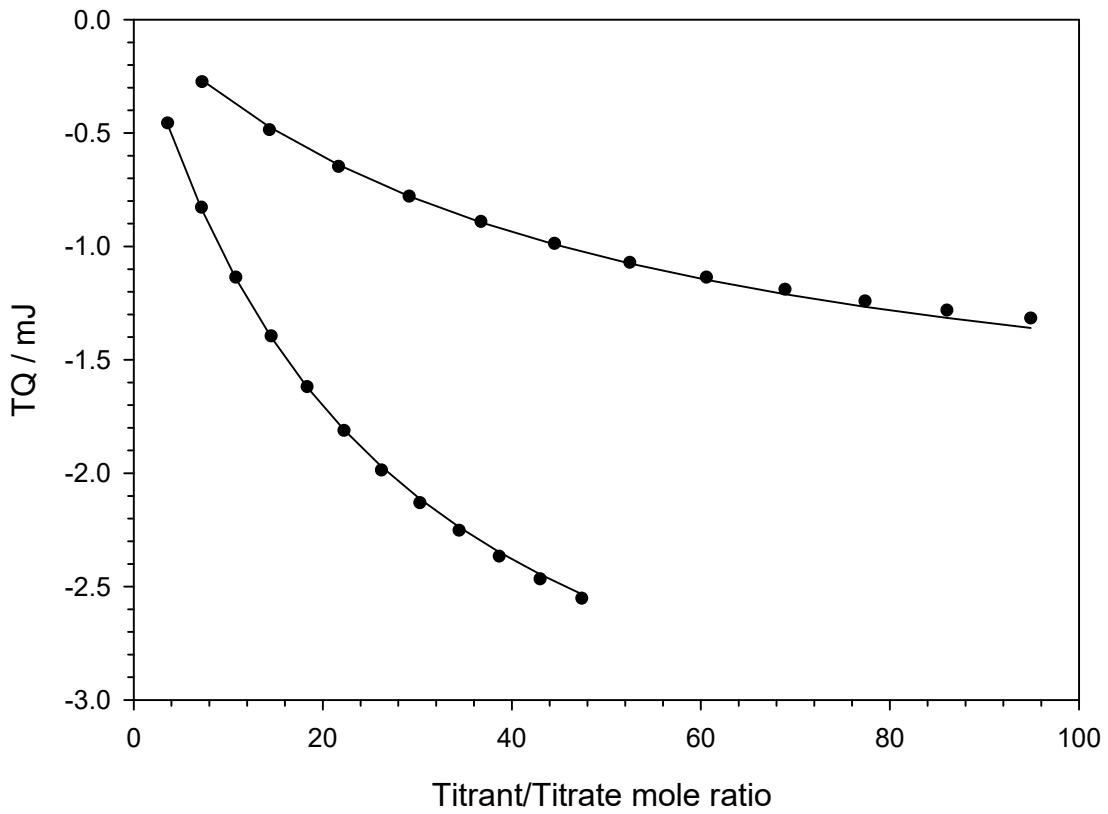

## 1 + MeβLac (H<sub>2</sub>O, pH 7.4, 298 K).

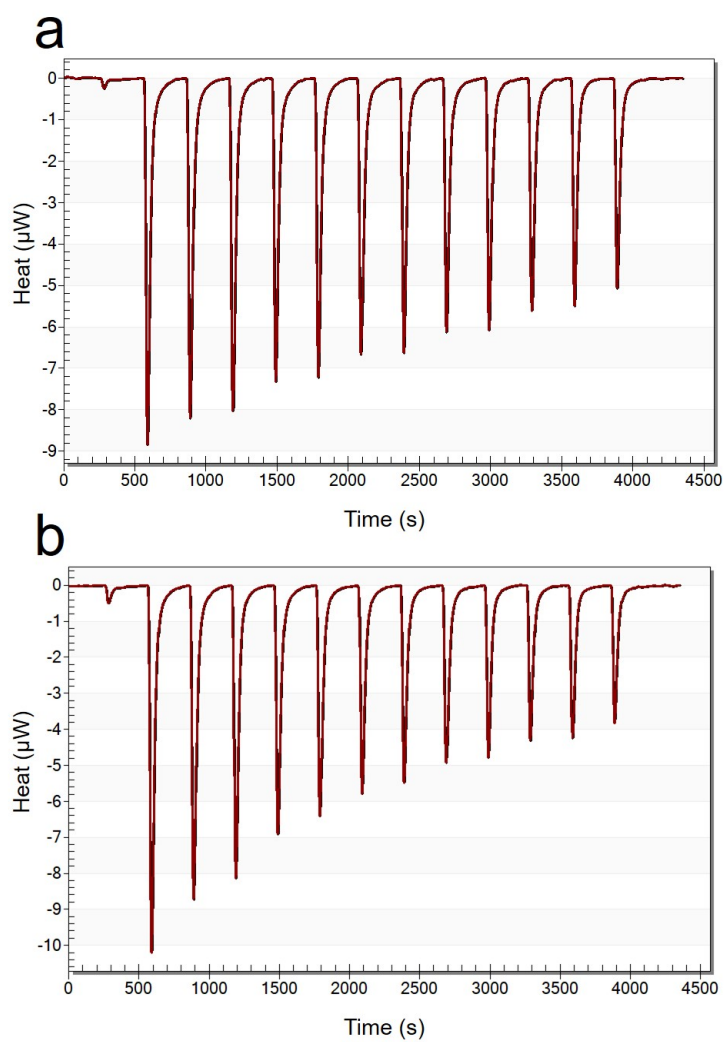

**Figure S16.** ITC results of MeβLac with **1** in H<sub>2</sub>O, pH 7.4, at 298 K: a) Titration of **1** ( $5.00 \cdot 10^{-4} \text{ mol L}^{-1}$ ) with MeβLac ( $4.05 \cdot 10^{-2} \text{ mol L}^{-1}$ ); b) Titration of **1** ( $2.50 \cdot 10^{-4} \text{ mol L}^{-1}$ ) with MeβLac ( $4.05 \cdot 10^{-2} \text{ mol L}^{-1}$ )

### Data Table

$$R = 1 \quad G = \text{Me}\beta\text{Lac}$$

$$[G] = 4.05 \cdot 10^{-2} \text{ mol L}^{-1}$$

#### Titration 1: $[R] = 5.00 \cdot 10^{-4} \text{ mol L}^{-1}$

| Injection | Q<br>( $\mu\text{J}$ ) | Corrected Q<br>( $\mu\text{J}$ ) | inj volume<br>( $\mu\text{L}$ ) | mol G<br>(mol) | mol R<br>(mol) | mol G / mol R | total volume<br>( $\mu\text{L}$ ) |
|-----------|------------------------|----------------------------------|---------------------------------|----------------|----------------|---------------|-----------------------------------|
| 1         | -12.6643               | -10.3446                         | 3                               | 1.22E-07       | 4.71E-07       | 0.257962      | 945                               |
| 2         | -355.837               | -255.389                         | 20                              | 9.29E-07       | 4.61E-07       | 2.014891      | 945                               |
| 3         | -337.515               | -246.202                         | 20                              | 1.72E-06       | 4.51E-07       | 3.809807      | 945                               |
| 4         | -321.21                | -231.573                         | 20                              | 2.49E-06       | 4.42E-07       | 5.643533      | 945                               |
| 5         | -307.439               | -220.479                         | 20                              | 3.25E-06       | 4.32E-07       | 7.516906      | 945                               |
| 6         | -294.123               | -207.986                         | 20                              | 3.99E-06       | 4.23E-07       | 9.430786      | 945                               |
| 7         | -278.541               | -197.392                         | 20                              | 4.72E-06       | 4.14E-07       | 11.38605      | 945                               |
| 8         | -269.484               | -193.411                         | 20                              | 5.43E-06       | 4.05E-07       | 13.38358      | 945                               |
| 9         | -254.601               | -175.159                         | 20                              | 6.12E-06       | 3.97E-07       | 15.42431      | 945                               |
| 10        | -242.224               | -165.482                         | 20                              | 6.80E-06       | 3.89E-07       | 17.50916      | 945                               |
| 11        | -229.656               | -152.557                         | 20                              | 7.47E-06       | 3.80E-07       | 19.63909      | 945                               |
| 12        | -211.43                | -136.949                         | 20                              | 8.12E-06       | 3.72E-07       | 21.81507      | 945                               |
| 13        | -203.921               | -128.65                          | 20                              | 8.76E-06       | 3.64E-07       | 24.03809      | 945                               |

#### Titration 2: $[R] = 2.50 \cdot 10^{-4} \text{ mol L}^{-1}$

| Injection | Q<br>( $\mu\text{J}$ ) | Corrected Q<br>( $\mu\text{J}$ ) | inj volume<br>( $\mu\text{L}$ ) | mol G<br>(mol) | mol R<br>(mol) | mol G / mol R | total volume<br>( $\mu\text{L}$ ) |
|-----------|------------------------|----------------------------------|---------------------------------|----------------|----------------|---------------|-----------------------------------|
| 1         | -25.6331               | -23.3134                         | 3                               | 1.22E-07       | 2.36E-07       | 0.515924      | 945                               |
| 2         | -428.45                | -328.001                         | 20                              | 9.29E-07       | 2.31E-07       | 4.029781      | 945                               |
| 3         | -378.526               | -287.214                         | 20                              | 1.72E-06       | 2.26E-07       | 7.619614      | 945                               |
| 4         | -337.159               | -247.522                         | 20                              | 2.49E-06       | 2.21E-07       | 11.28707      | 945                               |
| 5         | -301.294               | -214.334                         | 20                              | 3.25E-06       | 2.16E-07       | 15.03381      | 945                               |
| 6         | -270.68                | -184.543                         | 20                              | 3.99E-06       | 2.12E-07       | 18.86157      | 945                               |
| 7         | -250.135               | -168.986                         | 20                              | 4.72E-06       | 2.07E-07       | 22.77209      | 945                               |
| 8         | -226.28                | -150.207                         | 20                              | 5.43E-06       | 2.03E-07       | 26.76716      | 945                               |
| 9         | -209.695               | -130.252                         | 20                              | 6.12E-06       | 1.98E-07       | 30.84862      | 945                               |
| 10        | -190.567               | -113.825                         | 20                              | 6.80E-06       | 1.94E-07       | 35.01832      | 945                               |
| 11        | -174.747               | -97.6488                         | 20                              | 7.47E-06       | 1.90E-07       | 39.27817      | 945                               |
| 12        | -166.944               | -92.464                          | 20                              | 8.12E-06       | 1.86E-07       | 43.63013      | 945                               |
| 13        | -159.098               | -83.8265                         | 20                              | 8.76E-06       | 1.82E-07       | 48.07619      | 945                               |



## Results page

Reagent Reagent  
number name  
1 R  
2 G

sigma = 0.00992

| Formation constants | Value      | relative<br>std devn | log<br>beta | standard<br>deviation |   |   |
|---------------------|------------|----------------------|-------------|-----------------------|---|---|
| Beta A refined      | 0.2043E+03 | 0.0517               | 2.3103      | 0.0225                | 1 | 1 |
| Beta B constant     | 0.4421E+03 |                      | 2.6455      | 0.0676                | 2 | 0 |

| Formation entalpies | Value    | standard<br>deviation |
|---------------------|----------|-----------------------|
| -DeltaH A refined   | 23.8721  | 0.6050                |
| -DeltaH B refined   | 101.0108 | 2.8812                |

++++  
Thermodynamic Functions, kJ/mol

|   | - DeltaG° |        | - DeltaH° |        | T DeltaS° |        |
|---|-----------|--------|-----------|--------|-----------|--------|
| A | 13.1871   | 0.1283 | 23.8721   | 0.6050 | -10.6850  | 0.6996 |
| B | 15.1006   | 0.0628 | 101.0108  | 2.8812 | -85.9102  | 2.8819 |

++++

Correlation coefficients\*1000

Run timed at 16.38 on 28 Aug 2020

|   |      |     |
|---|------|-----|
| 2 | -689 |     |
| 3 | -261 | 862 |
| 1 |      | 2   |

Order of parameters:

|   |         |   |
|---|---------|---|
| 1 | Beta    | A |
| 2 | -DeltaH | A |
| 3 | -DeltaH | B |

### Results table

| Addition<br>( $\mu$ L) | Qobs<br>(mJ) | Qcalc<br>(mJ) | residual<br>(mJ) | QTobs<br>(mJ) | QTcalc<br>(mJ) |
|------------------------|--------------|---------------|------------------|---------------|----------------|
| 0.8100                 | -0.0103      |               |                  |               |                |
| 20.8100                | -0.2554      | -0.2342       | -0.0212          | -0.2657       | -0.2445        |
| 40.8100                | -0.2462      | -0.2478       | 1.6000e-3        | -0.5119       | -0.4923        |
| 60.8100                | -0.2316      | -0.2474       | 0.0158           | -0.7435       | -0.7397        |
| 80.8100                | -0.2205      | -0.2387       | 0.0183           | -0.9640       | -0.9784        |
| 100.8100               | -0.2080      | -0.2258       | 0.0178           | -1.1720       | -1.2042        |
| 120.8100               | -0.1974      | -0.2108       | 0.0135           | -1.3694       | -1.4150        |
| 140.8100               | -0.1934      | -0.1955       | 2.0000e-3        | -1.5628       | -1.6105        |
| 160.8100               | -0.1752      | -0.1804       | 5.3000e-3        | -1.7379       | -1.7909        |
| 180.8100               | -0.1655      | -0.1662       | 7.0000e-4        | -1.9034       | -1.9571        |
| 200.8100               | -0.1526      | -0.1530       | 4.0000e-4        | -2.0560       | -2.1101        |
| 220.8100               | -0.1369      | -0.1409       | 3.9000e-3        | -2.1929       | -2.2509        |
| 240.8100               | -0.1287      | -0.1298       | 1.1000e-3        | -2.3216       | -2.3807        |
| 1.4200                 | -0.0233      |               |                  |               |                |
| 21.4200                | -0.3280      | -0.3169       | -0.0111          | -0.3513       | -0.3402        |
| 41.4200                | -0.2872      | -0.2776       | -9.7000e-3       | -0.6385       | -0.6178        |
| 61.4200                | -0.2475      | -0.2416       | -5.9000e-3       | -0.8861       | -0.8594        |
| 81.4200                | -0.2143      | -0.2102       | -4.1000e-3       | -1.1004       | -1.0696        |
| 101.4200               | -0.1845      | -0.1833       | -1.2000e-3       | -1.2849       | -1.2529        |
| 121.4200               | -0.1690      | -0.1605       | -8.5000e-3       | -1.4539       | -1.4134        |
| 141.4200               | -0.1502      | -0.1412       | -9.0000e-3       | -1.6041       | -1.5546        |
| 161.4200               | -0.1303      | -0.1249       | -5.4000e-3       | -1.7344       | -1.6795        |
| 181.4200               | -0.1138      | -0.1110       | -2.8000e-3       | -1.8482       | -1.7905        |
| 201.4200               | -0.0976      | -0.0992       | 1.5000e-3        | -1.9458       | -1.8897        |
| 221.4200               | -0.0925      | -0.0890       | -3.4000e-3       | -2.0383       | -1.9788        |
| 241.4200               | -0.0838      | -0.0803       | -3.5000e-3       | -2.1221       | -2.0590        |

## Titration Plots

Experimental (symbols) and calculated (cross and lines) heats

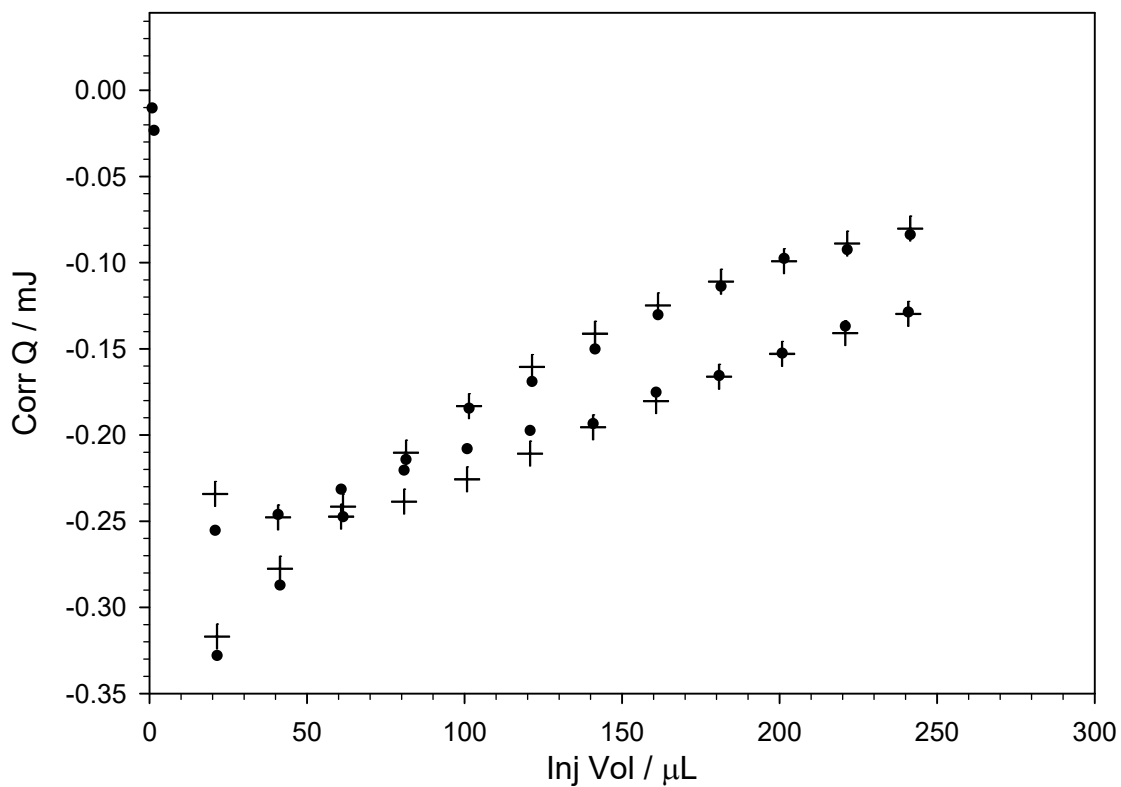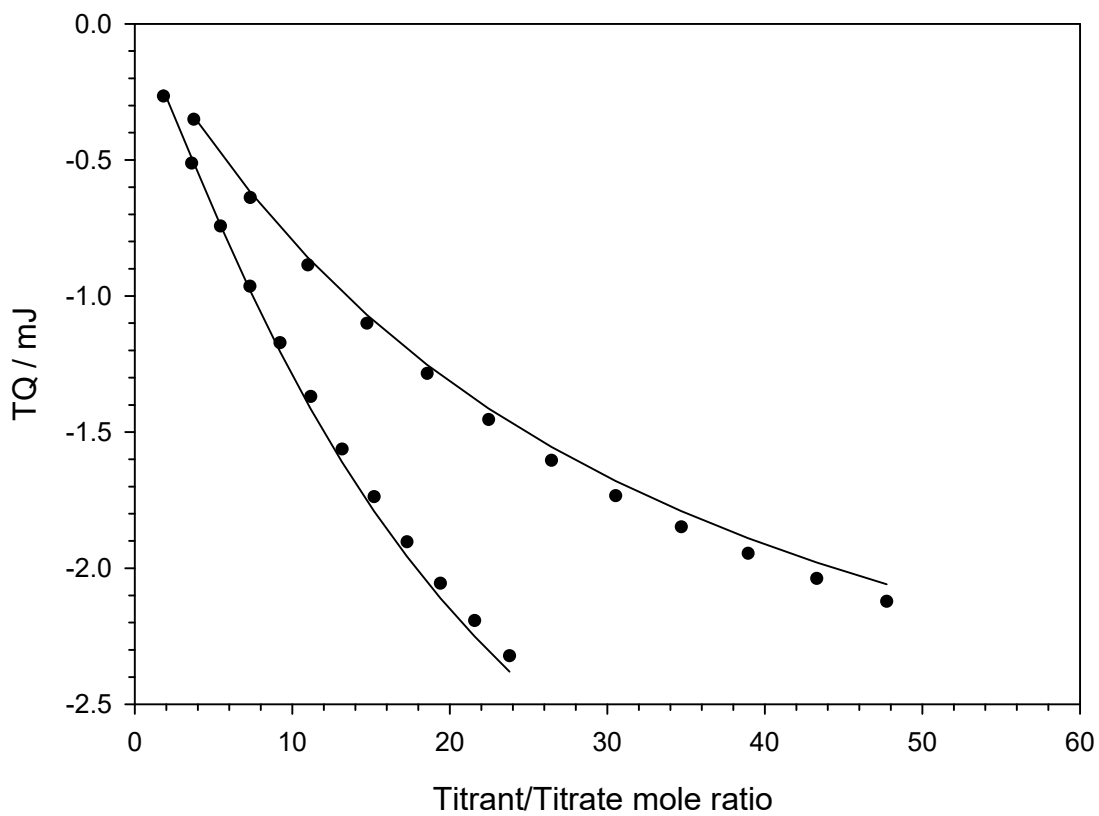

## 1 + Me $\beta$ GlcNAc<sub>2</sub> (H<sub>2</sub>O, pH 7.4, 298 K).

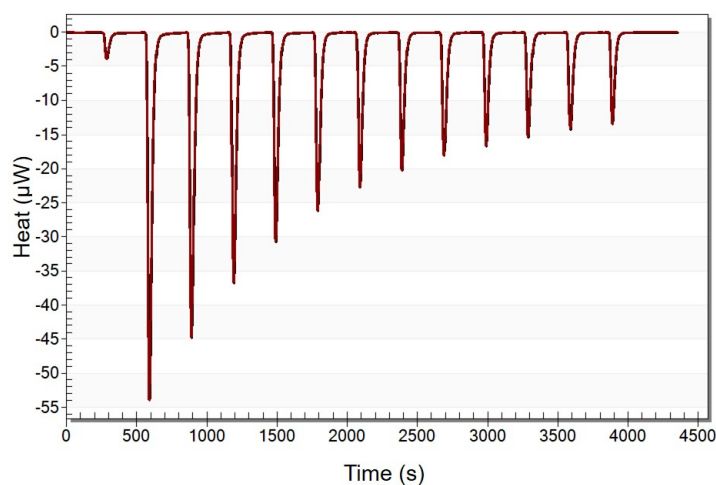

**Figure S17.** ITC results the titration of **1** ( $4.04 \cdot 10^{-4} \text{ mol L}^{-1}$ ) with Me $\beta$ GlcNAc<sub>2</sub> ( $1.06 \cdot 10^{-2} \text{ mol L}^{-1}$ ) in H<sub>2</sub>O, pH 7.4, at 298 K

### Data Table

R = **1** G = Me $\beta$ GlcNAc<sub>2</sub>

[G] =  $1.06 \cdot 10^{-2} \text{ mol L}^{-1}$

**Titration:** [R] =  $4.04 \cdot 10^{-4} \text{ mol L}^{-1}$

| Injection | Q<br>( $\mu\text{J}$ ) | Corrected Q<br>( $\mu\text{J}$ ) | inj volume<br>( $\mu\text{L}$ ) | mol G<br>(mol) | mol R<br>(mol) | mol G / mol R | total volume<br>( $\mu\text{L}$ ) |
|-----------|------------------------|----------------------------------|---------------------------------|----------------|----------------|---------------|-----------------------------------|
| 1         | -141.752               | -126.83                          | 3                               | 3.18E-08       | 4.18E-07       | 0.076031      | 945                               |
| 2         | -1898.54               | -1673.16                         | 20                              | 2.43E-07       | 4.09E-07       | 0.593867      | 945                               |
| 3         | -1590.97               | -1423.57                         | 20                              | 4.50E-07       | 4.01E-07       | 1.122899      | 945                               |
| 4         | -1294.78               | -1286.4                          | 20                              | 6.52E-07       | 3.92E-07       | 1.66337       | 945                               |
| 5         | -1073.32               | -1126.42                         | 20                              | 8.51E-07       | 3.84E-07       | 2.215527      | 945                               |
| 6         | -906.664               | -957.795                         | 20                              | 1.04E-06       | 3.76E-07       | 2.779622      | 945                               |
| 7         | -781.13                | -821.685                         | 20                              | 1.23E-06       | 3.68E-07       | 3.355914      | 945                               |
| 8         | -688.656               | -716.257                         | 20                              | 1.42E-06       | 3.60E-07       | 3.944666      | 945                               |
| 9         | -617.208               | -636.098                         | 20                              | 1.60E-06       | 3.52E-07       | 4.546148      | 945                               |
| 10        | -564.001               | -584.506                         | 20                              | 1.78E-06       | 3.45E-07       | 5.160635      | 945                               |
| 11        | -515.716               | -533.281                         | 20                              | 1.95E-06       | 3.38E-07       | 5.788408      | 945                               |
| 12        | -476.9                 | -488.287                         | 20                              | 2.13E-06       | 3.31E-07       | 6.429755      | 945                               |
| 13        | -435.708               | -434.053                         | 20                              | 2.29E-06       | 3.24E-07       | 7.084968      | 945                               |

## Results page

```

Reagent Reagent
number  name
  1      R
  2      G
  
```

sigma = 0.01205

| Formation constants | Value      | relative<br>std devn | log<br>beta | standard<br>deviation |   |   |
|---------------------|------------|----------------------|-------------|-----------------------|---|---|
| Beta A refined      | 0.3066E+04 | 0.1560               | 3.4865      | 0.0677                | 1 | 1 |
| Beta B refined      | 0.5192E+08 | 0.5175               | 7.7153      | 0.2247                | 2 | 1 |
| Beta C constant     | 0.4421E+03 |                      | 2.6455      | 0.0676                | 2 | 0 |

| Formation entalpies | Value     | standard<br>deviation |
|---------------------|-----------|-----------------------|
| -DeltaH A refined   | 42.4924   | 4.5528                |
| -DeltaH B refined   | -98.6733  | 7.2566                |
| -DeltaH C refined   | -293.3921 | 16.2613               |

+++++

Thermodynamic Functions, kJ/mol

|   | - DeltaG° |        | - DeltaH° |         | T DeltaS° |         |
|---|-----------|--------|-----------|---------|-----------|---------|
| A | 19.9011   | 0.3866 | 42.4924   | 4.5528  | -22.5913  | 4.4236  |
| B | 44.0392   | 1.2829 | -98.6733  | 7.2566  | 142.7125  | 8.2500  |
| C | 15.1006   | 0.2656 | -293.3921 | 16.2613 | 308.4927  | 16.2634 |

+++++

Correlation coefficients\*1000

Run timed at 10.03 on 20 Oct 2020

```

 2  952
 3  372  634
 4 -526 -739 -951
 5  646  434 -359  283
   1    2    3    4
  
```

Order of parameters:

```

 1      Beta  A
 2      Beta  B
 3     -DeltaH A
 4     -DeltaH B
 5     -DeltaH C
  
```

### Results table

| Addition<br>( $\mu\text{L}$ ) | Qobs<br>(mJ) | Qcalc<br>(mJ) | residual<br>(mJ) | QTobs<br>(mJ) | QTcalc<br>(mJ) |
|-------------------------------|--------------|---------------|------------------|---------------|----------------|
| 1.5200                        | -0.1268      |               |                  |               |                |
| 21.5200                       | -1.6732      | -1.6732       | 0.0000           | -1.8000       | -1.8000        |
| 41.5200                       | -1.4236      | -1.4227       | -9.0000e-4       | -3.2236       | -3.2227        |
| 61.5200                       | -1.2864      | -1.2960       | 9.6000e-3        | -4.5100       | -4.5187        |
| 81.5200                       | -1.1264      | -1.1086       | -0.0179          | -5.6364       | -5.6272        |
| 101.5200                      | -0.9578      | -0.9524       | -5.4000e-3       | -6.5942       | -6.5796        |
| 121.5200                      | -0.8217      | -0.8286       | 6.9000e-3        | -7.4159       | -7.4082        |
| 141.5200                      | -0.7163      | -0.7295       | 0.0133           | -8.1321       | -8.1378        |
| 161.5200                      | -0.6361      | -0.6488       | 0.0127           | -8.7682       | -8.7866        |
| 181.5200                      | -0.5845      | -0.5819       | -2.6000e-3       | -9.3527       | -9.3685        |
| 201.5200                      | -0.5333      | -0.5256       | -7.7000e-3       | -9.8860       | -9.8941        |
| 221.5200                      | -0.4883      | -0.4774       | -0.0108          | -10.3743      | -10.3715       |
| 241.5200                      | -0.4341      | -0.4359       | 1.8000e-3        | -10.8083      | -10.8074       |

### Titration Plots

Experimental (symbols) and calculated (cross and lines) heats

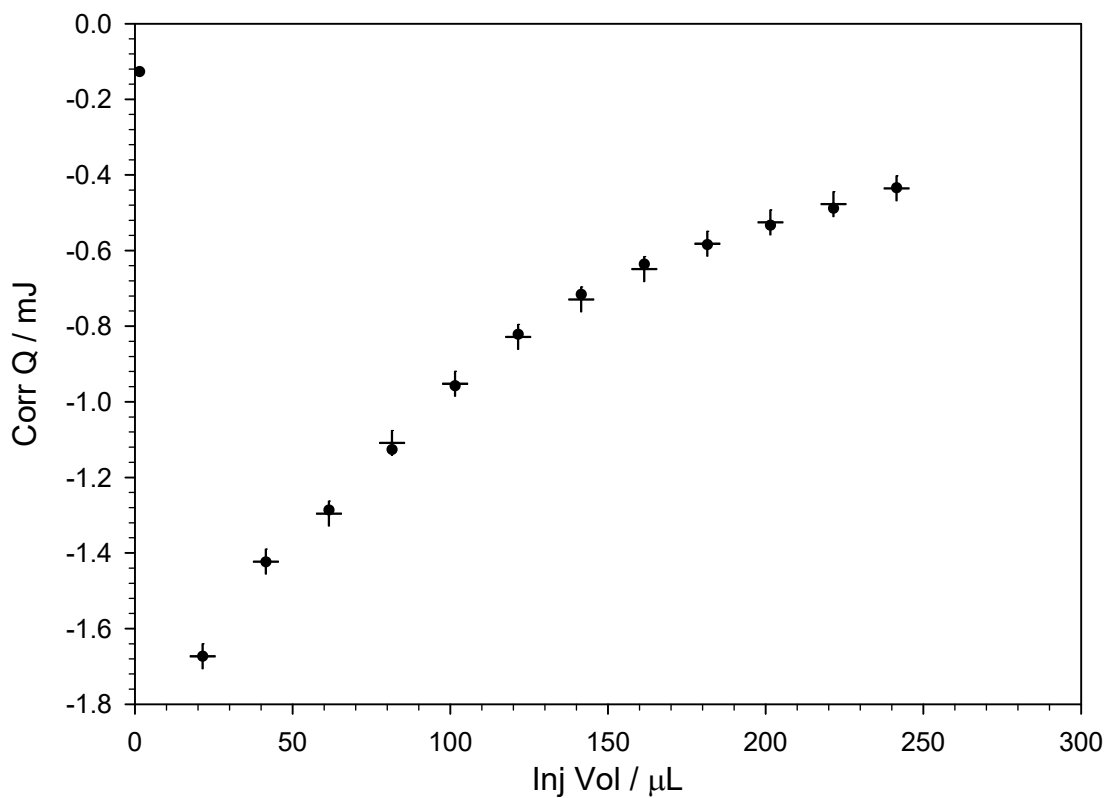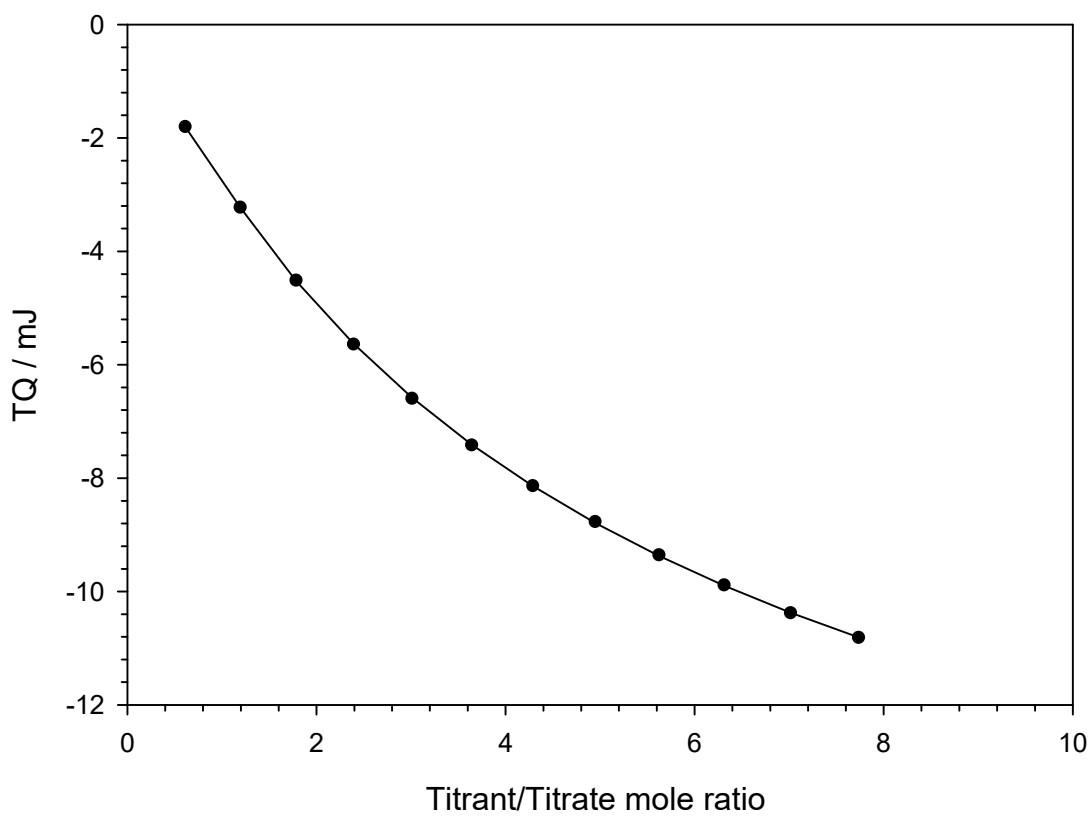

## Structural studies.

**NMR methods.** NMR experiments were performed at 500 MHz in D<sub>2</sub>O at pD 11 at 298 K. The experiments on the complex were performed using an equimolar solution of **1** (R) and Me $\beta$ GlcNAc<sub>2</sub> (G). Because of broad signals observed for the complex, due to a medium-exchange equilibrium in the NMR time scale, related to the strong binding, a concentration of 15 mM for both **1** and Me $\beta$ GlcNAc<sub>2</sub> was used to obtain an acceptable signal to noise ratio for NOESY experiments. Alkaline pD was used to obtain sharper signal of the receptor at operative 15 mM concentration. In addition to standard 1D <sup>1</sup>H NMR spectra, COSY, TOCSY, HSQC and NOESY experiments (500 ms mixing time) were also acquired to assign the resonances of all the molecular entities and to detect the relevant intramolecular and intermolecular contacts.

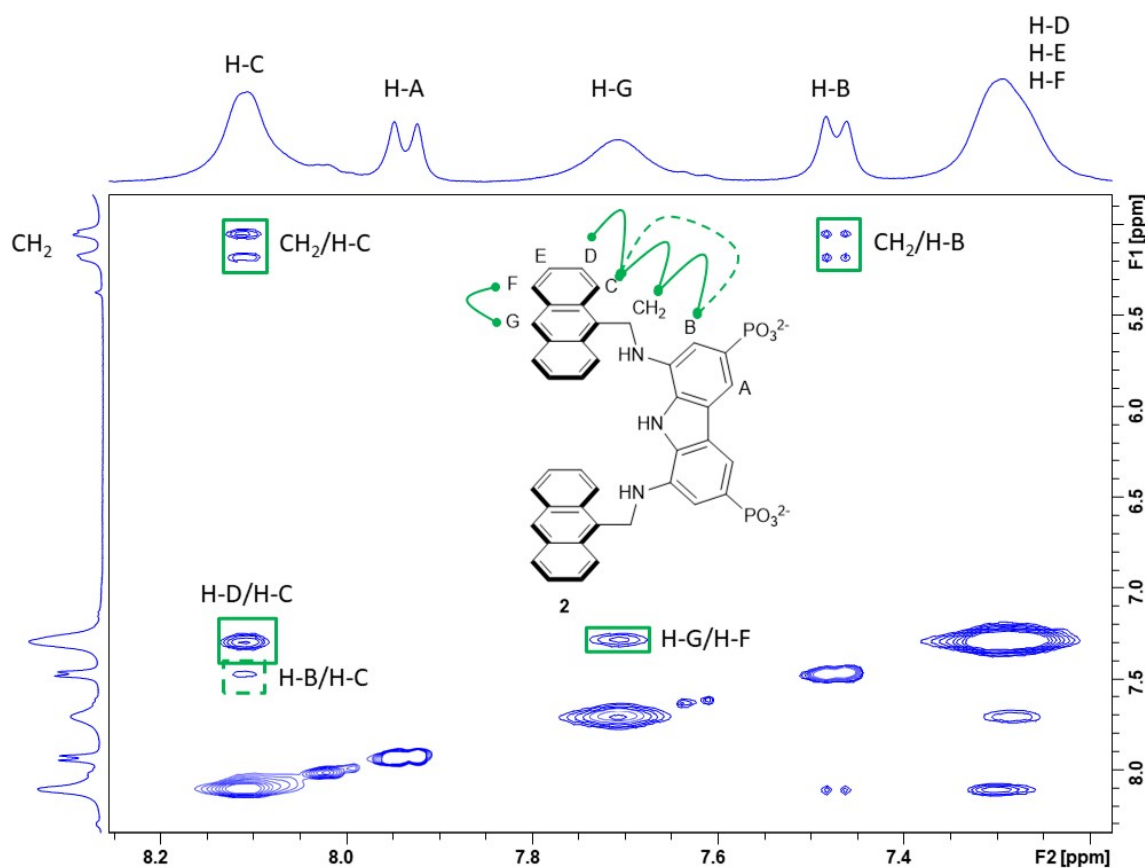

**Figure S18.** 500 MHz NOESY spectrum of an equimolar mixture of Me $\beta$ GlcNAc<sub>2</sub> and **1** (15 mM each) in D<sub>2</sub>O at 298 K. Intramolecular NOE cross peaks of the receptor **1** are indicated by squares and schematically represented (solid and dashed squares and lines were used to indicate strong and medium NOEs).



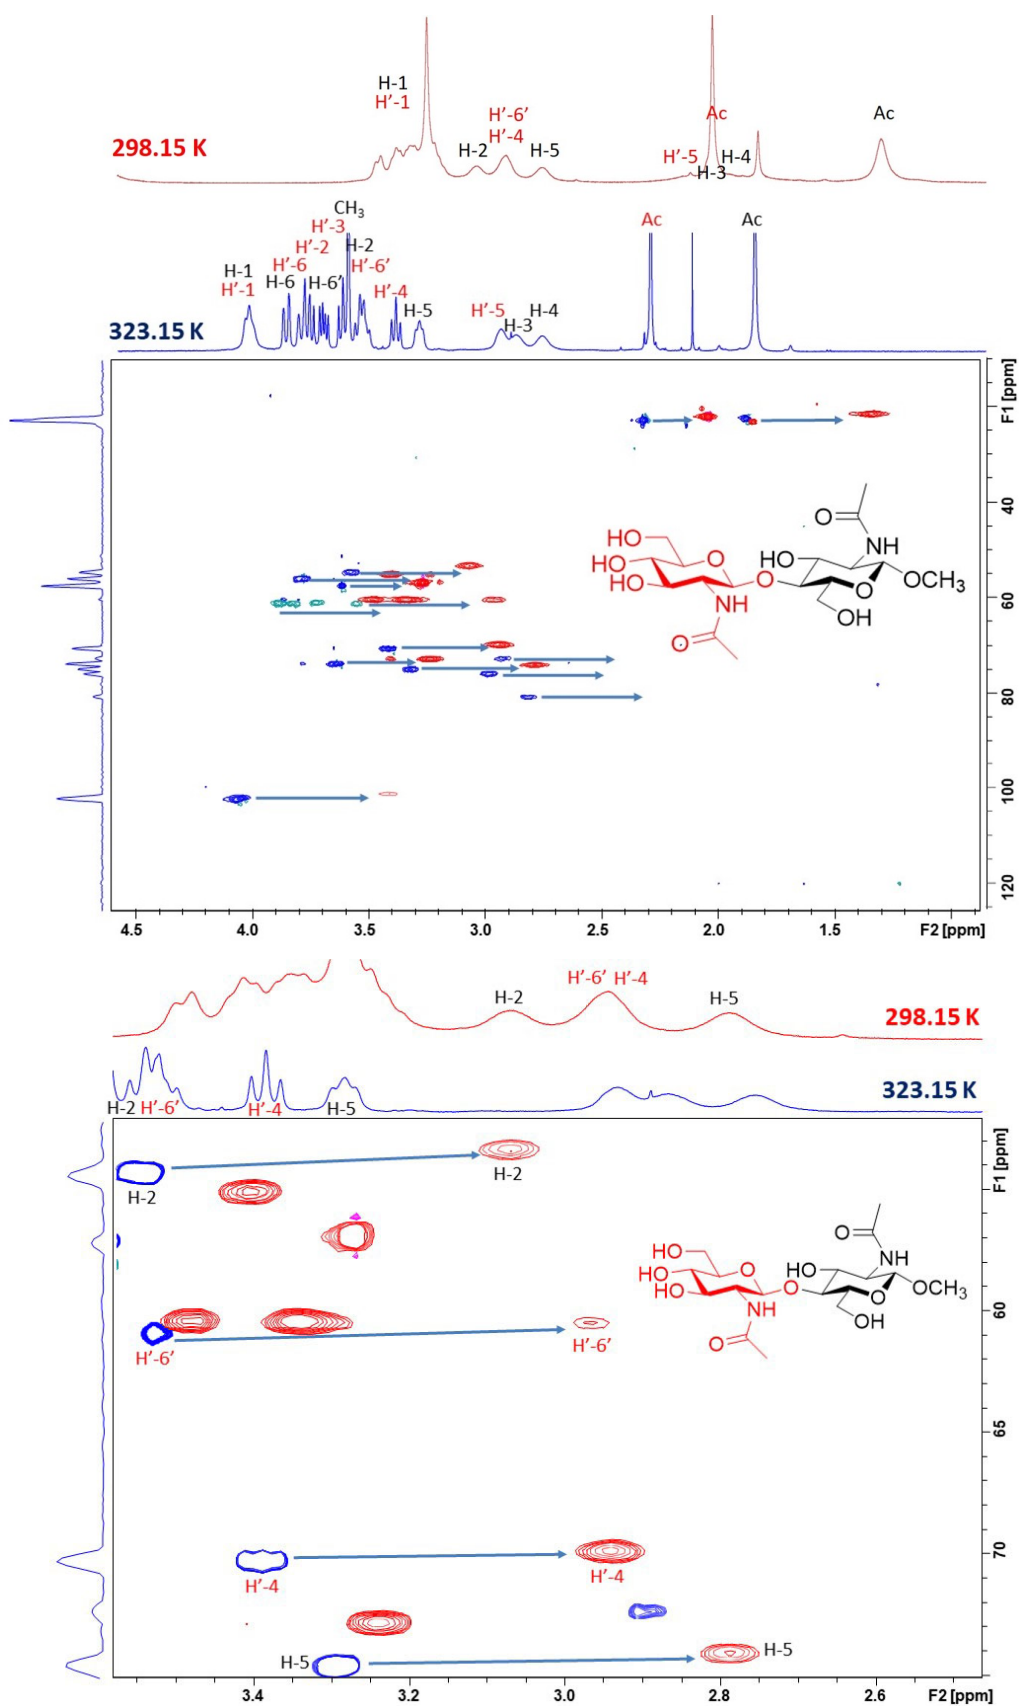

**Figure S19.** Superposition of 500 MHz HSQC and <sup>1</sup>H-NMR spectra acquired at 298.15 K (in red) and 323.15 K (in blue) of an equimolar mixture of MeβGlcNAc<sub>2</sub> and **1** (15 mM each) in D<sub>2</sub>O at 298 K. Temperature-dependent chemical shift variations are indicated by arrows and were used to assign proton signals of broad peaks at 298.15 K.

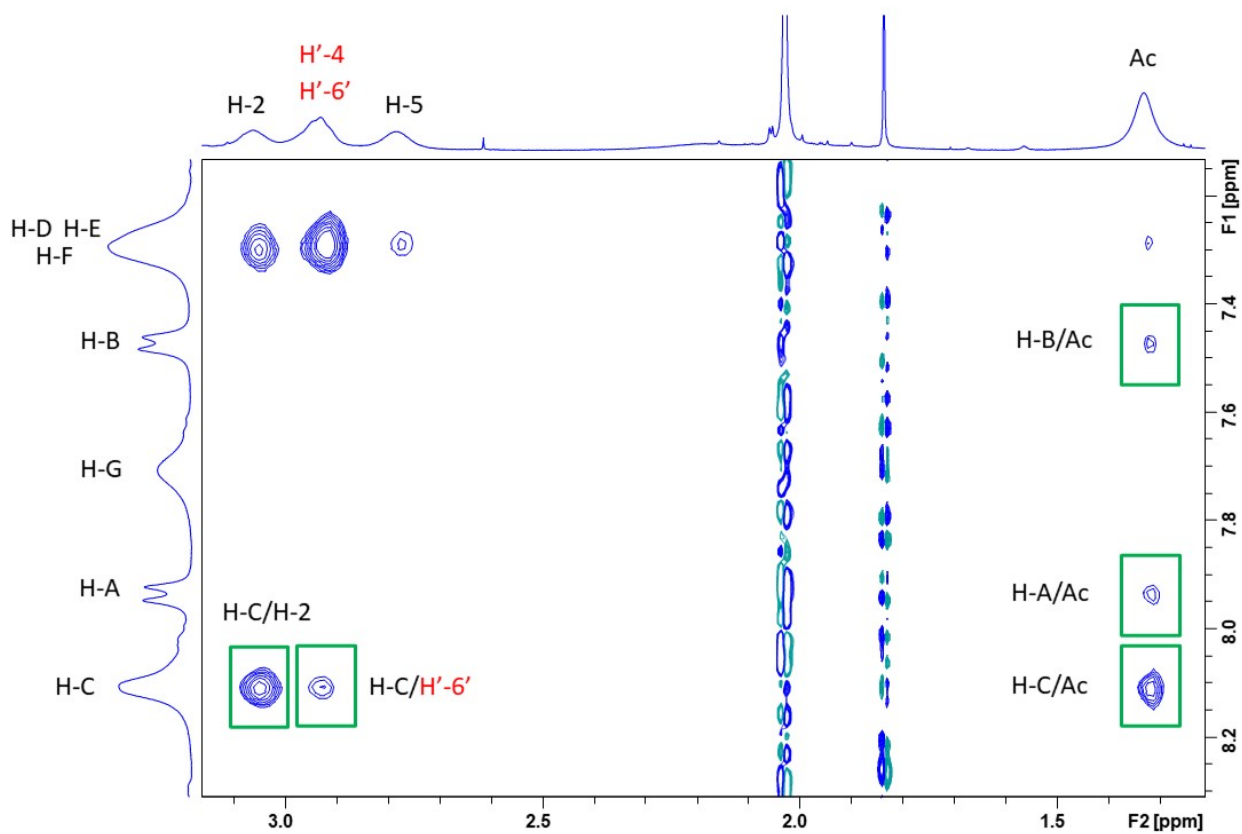

**Figure S20.** 500 MHz NOESY spectrum of an equimolar mixture of Me $\beta$ GlcNAc<sub>2</sub> and **1** (15 mM each) in D<sub>2</sub>O at 298 K. Unambiguous intermolecular NOE cross peaks are indicated by squares.

**Molecular modeling methods.** Initial structures of Me $\beta$ GlcNAc<sub>2</sub> and receptor **1** were built and minimized using conjugate gradients with the OPLS\_2005 force field, water was set as solvent and an extended cutoff was used to treat remote interactions. Each phosphonate group of the receptor was considered monoprotonated, accordingly with the degree of protonation observed for a structurally correlated receptor at neutral pH.<sup>[11]</sup> A maximum number of 5000 iterations were employed with the Polak-Ribiere Conjugate Gradient (PRCG) scheme, until the convergence energy threshold was 0.05. Once the optimum geometries had been achieved, a conformational search protocol was adopted for the receptors, using a Monte Carlo torsional sampling method (MCMM) with automatic setup during the calculation, energy window of 21 kJ mol<sup>-1</sup>, 1000 maximum number of steps, and 100 steps per torsion of the bond to be rotated. The best structures obtained from this calculation in terms of energy were chosen and then, the disaccharide was manually docked within the receptors cleft with different starting relative orientations and further minimized. Minimization results afford different structures which were employed as input for further conformational search protocols without any constraints. Several complexes were found to be stable, in which the sugar was located inside the receptor cleft. The lowest energy structures were analyzed to check the agreement with experimental NMR data. The protocol returned a family of structures, containing the minimum energy structure of the conformational search, in agreement with the observed NOE data.

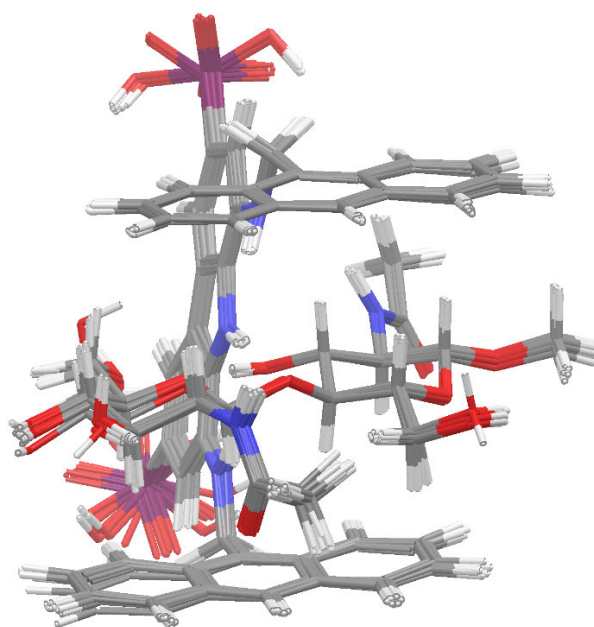

**Figure S21.** Molecular modelling results from conformational search for the complex of **1** with Me $\beta$ GlcNAc<sub>2</sub>. Superposition of the 16 energy minimum structures, within an energy window of 10.0 kJ mol<sup>-1</sup>, identified among the 156 structures obtained from the calculation.

## References.

- S1. A. Vacca, C. Nativi, M. Cacciarini, R. Pergoli, S. Roelens, *J. Am. Chem. Soc.* **2004**, *126*, 16456-16465.
- S2. C. Frassinetti, S. Ghelli, P. Gans, A. Sabatini, M. S. Moruzzi, A. Vacca, *Anal. Biochem.* **1995**, *231*, 374-382.
- S3. P. Gans, A. Sabatini, A. Vacca, *J. Solution Chem.* **2008**, *37*, 467-476.
